# Supplementary material for: DABCO-catalyzed unusual [4 + 2] cycloaddition reaction: non-substituted allenoate acts as a four-carbon synthon and facile synthesis of spirooxindoles
Source: Royal Society of Chemistry journal article supplement (doi:10.1039/c5ob02383a), 2015-12-13

**DABCO-catalyzed unusual [4+2] cycloaddition reaction: non-substituted allenolate acts as a four-carbon synthon and facile synthesis of spirooxindoles**

Yufen Liu, Yanlong Du, Aimin Yu,\* Haifeng Mu and Xiangtai Meng\*

*Tianjin Key Laboratory of Organic Solar Cells and Photochemical Conversion, School of Chemistry & Chemical Engineering, Tianjin University of Technology, Tianjin 300384, China*

mengxiangtai23@mail.nankai.edu.cn

**Contents**

|                                                                |    |
|----------------------------------------------------------------|----|
| 1. General information.....                                    | 2  |
| 2. Typical procedure for the synthesis of products 3.....      | 2  |
| 3. Characterization of the Products.....                       | 3  |
| 4. Copies of <sup>1</sup> H NMR and <sup>13</sup> C NMR.....   | 20 |
| 5. X-ray crystallography data of <b>1h</b> and <b>3s</b> ..... | 72 |

## 1. General information:

All reactions were performed under N<sub>2</sub> atmospheres in oven-dried glassware with magnetic stirring. Unless otherwise stated, all reagents were purchased from commercial suppliers and used without further purification. All solvents were purified and dried according to standard methods prior to use. TLC monitored all reactions with silica gel-coated plates. Flash column chromatography was performed using 200-300 mesh silica gel. <sup>1</sup>H- and <sup>13</sup>C-NMR spectrum was recorded at ambient temperature on Bruker 400 instruments. All spectra were referenced to CDCl<sub>3</sub> (<sup>1</sup>H δ 7.26 ppm and <sup>13</sup>C NMR δ 77.00 ppm). HRMS were obtained on Waters Xevo Q-TOF MS with ESI resource. Melting points were measured on a RY-I apparatus and are reported uncorrected. Substrates **1** were synthesized according to the known procedure.<sup>1</sup>

## 2. Typical procedure for the synthesis of products **3**:

Substrate **1** and DABCO (12 mol%) were added to an oven-dried round bottomflask with a magnetic stir bar. The solvent CH<sub>3</sub>OH/CHCl<sub>3</sub> (2 mL, v/v = 1:1.5) and allenolate **2a** (1 eq.) were then added. The resulting mixture was stirred at 60 °C for two hours. Then, another batch of DABCO (12 mol%) and allenolate **2a** (1 eq.) was added and stirred for another two hours. A last batch of DABCO and allenolate **2a** were added and stirred for one to three hours more (see Table 2). When the reaction was completed, the solvent was evaporated and the crude residue was purified by column chromatography (ethyl acetate: petroleum ether = 1:2) with silica gel as stationary phase to obtain the product.

1 Y. Liu, Y. Du, A. Yu, D. Qin and X. Meng, *Tetrahedron*, 2015, **71**, 7706-7716.

### 3. Characterization of the Products

**Ethyl-(E)-3-ethoxy-3-(4-methoxy-2,2'-dioxospiro[cyclohexane-1,3'-indolin]-3-en-6-yl)acrylate (3a):** yield 42 mg (63%, white solid); mp 204-205 °C; IR (KBr) 3444, 2925, 2358, 2339, 2027, 1714, 1660, 1614  $\text{cm}^{-1}$ ;  $^1\text{H}$  NMR (400 MHz,  $\text{CDCl}_3$ )  $\delta$  .74 (s, 1H), 7.19 (td,  $J = 7.8, 1.2$  Hz, 1H), 7.07 (d,  $J = 7.2$  Hz, 1H), 6.97 (td,  $J = 7.6, 0.8$  Hz, 1H), 6.80 (d,  $J = 7.6$  Hz, 1H), 5.51 (d,  $J = 1.2$  Hz, 1H), 5.31 (dd,  $J = 12.0, 4.8$  Hz, 1H), 4.77 (s, 1H), 4.11 (q,  $J = 7.2$  Hz, 2H), 3.80 (s, 3H), 3.59-3.71 (m, 2H), 3.39-3.47 (m, 1H), 2.53 (dd,  $J = 17.2, 4.8$  Hz, 1H), 1.25 (t,  $J = 7.2$  Hz, 3H), 1.12 (t,  $J = 7.0$  Hz, 3H) ppm;  $^{13}\text{C}$  NMR (100 MHz,  $\text{CDCl}_3$ )  $\delta$  192.68, 178.91, 175.44, 170.77, 167.03, 141.61, 128.94, 128.52, 124.11, 122.37, 109.11, 100.62, 92.42, 64.32, 61.26, 59.66, 56.15, 40.75, 29.39, 14.26, 13.04 ppm; ESI-HRMS: calcd. for  $\text{C}_{21}\text{H}_{23}\text{NO}_6 + \text{H}$  386.1604, found 386.1610.

**Ethyl-(E)-3-ethoxy-3-(4-methoxy-5'-methyl-2,2'-dioxospiro[cyclohexane-1,3'-indolin]-3-en-6-yl)acrylate (3b):** yield 37 mg (57%, white solid); mp 209-210 °C; IR (KBr) 3445, 2940, 2360, 2341, 2026, 1731, 1660, 1614  $\text{cm}^{-1}$ ;  $^1\text{H}$  NMR (400 MHz,  $\text{CDCl}_3$ )  $\delta$  7.52 (s, 1H), 6.98 (dt,  $J = 8.0, 1.0$  Hz, 1H), 6.89 (s, 1H), 6.69 (d,  $J = 8.0$  Hz, 1H), 5.51 (d,  $J = 1.6$  Hz, 1H), 5.28 (dd,  $J = 12.0, 4.8$  Hz, 1H), 4.77 (s, 1H), 4.08-4.16 (m, 2H), 3.79 (s, 3H), 3.58-3.70 (m, 2H), 3.40-3.48 (m, 1H), 2.52 (dd,  $J = 17.2, 4.8$  Hz, 1H), 2.25 (s, 3H), 1.24 (d,  $J = 7.0$  Hz, 3H), 1.13 (td,  $J = 7.2, 1.6$  Hz, 3H) ppm;  $^{13}\text{C}$  NMR (100 MHz,  $\text{CDCl}_3$ )  $\delta$  192.87, 178.90, 175.31, 170.86, 167.05, 139.05, 131.70, 128.94, 124.90, 108.75, 100.68, 92.43, 64.29, 61.36, 59.64, 56.14, 40.77, 29.35, 21.14, 14.32, 13.10 ppm; ESI-HRMS: calcd. for  $\text{C}_{22}\text{H}_{25}\text{NO}_6 + \text{H}$  400.1760, found 400.1761.

**Ethyl-(E)-3-(4,5'-dimethoxy-2,2'-dioxospiro[cyclohexane-1,3'-indolin]-3-en-6-yl)-3-ethoxyacrylate (3c):** yield 47 mg (73%, white solid); mp 213-214 °C; IR (KBr) 3452, 2944, 2361, 2342, 2026, 1704, 1664, 1612  $\text{cm}^{-1}$ ;  $^1\text{H}$  NMR (400 MHz,  $\text{CDCl}_3$ )  $\delta$  7.60 (s, 1H), 6.65-6.79 (m, 3H), 5.51 (d,  $J = 1.6$  Hz, 1H), 5.30 (dd,  $J = 12.4, 4.8$  Hz, 1H), 4.78 (s, 1H), 4.10 (q,  $J = 7.2$  Hz, 2H), 3.80 (s, 3H), 3.71 (s, 3H), 3.59-3.70 (m, 2H), 3.40-3.48 (m, 1H), 2.51 (dd,  $J = 16.8, 4.8$  Hz, 1H), 1.24 (t,  $J = 7.0$  Hz, 3H), 1.13

(t,  $J = 7.0$  Hz, 3H) ppm;  $^{13}\text{C}$  NMR (100 MHz,  $\text{CDCl}_3$ )  $\delta$  192.66, 178.97, 175.19, 170.75, 167.10, 155.57, 134.88, 130.08, 114.13, 110.60, 109.49, 100.64, 92.51, 64.31, 61.82, 59.65, 56.15, 55.57, 40.71, 29.38, 14.26, 13.11 ppm; ESI-HRMS: calcd. for  $\text{C}_{22}\text{H}_{25}\text{NO}_7 + \text{H}$  416.1709, found 416.1703.

**Ethyl-(E)-3-ethoxy-3-(5'-fluoro-4-methoxy-2,2'-dioxospiro[cyclohexane-1,3'-indolin]-3-en-6-yl)acrylate (3d):** yield 56 mg (86%, white solid); mp 211-212 °C; IR (KBr) 3452, 2940, 2362, 2344, 2026, 1711, 1656, 1609  $\text{cm}^{-1}$ ;  $^1\text{H}$  NMR (400 MHz,  $\text{CDCl}_3$ )  $\delta$  7.80 (s, 1H), 6.90 (td,  $J = 8.8, 2.4$  Hz, 1H), 6.84 (dd,  $J = 8.0, 2.4$  Hz, 1H), 6.74 (dd,  $J = 8.4, 4.2$  Hz, 1H), 5.50 (d,  $J = 1.6$  Hz, 1H), 5.29 (dd,  $J = 12.0, 4.8$  Hz, 1H), 4.80 (s, 1H), 4.08-4.18 (m, 2H), 3.80 (s, 3H), 3.58-3.71 (m, 2H), 3.41-3.49 (m, 1H), 2.52 (dd,  $J = 17.2, 4.8$  Hz, 1H), 1.25 (t,  $J = 7.0$  Hz, 3H), 1.13 (t,  $J = 7.0$  Hz, 3H) ppm;  $^{13}\text{C}$  NMR (100 MHz,  $\text{CDCl}_3$ )  $\delta$  192.09, 179.14, 175.50, 170.21, 167.02, 158.85 (d,  $J = 238.4$  Hz), 137.65 (d,  $J = 2.1$  Hz), 130.56 (d,  $J = 8.5$  Hz), 114.98 (d,  $J = 23.5$  Hz), 112.23 (d,  $J = 25.0$  Hz), 109.66 (d,  $J = 25.0$  Hz), 100.47, 92.69, 64.38, 61.92, 59.82, 56.22, 40.61, 29.26, 14.23, 13.05 ppm; ESI-HRMS: calcd. for  $\text{C}_{21}\text{H}_{22}\text{FNO}_6 + \text{H}$  404.1509, found 404.1510.

**Ethyl-(E)-3-(5'-chloro-4-methoxy-2,2'-dioxospiro[cyclohexane-1,3'-indolin]-3-en-6-yl)-3-ethoxyacrylate (3e):** yield 58 mg (90%, white solid); mp 232-233 °C; IR (KBr) 3442, 2924, 2361, 2342, 2026, 1711, 1656, 1610  $\text{cm}^{-1}$ ;  $^1\text{H}$  NMR (400 MHz,  $\text{CDCl}_3$ )  $\delta$  7.98 (s, 1H), 7.16 (dd,  $J = 8.4, 2.0$  Hz, 1H), 7.07 (d,  $J = 2.0$  Hz, 1H), 6.74 (d,  $J = 8.4$  Hz, 1H), 5.50 (d,  $J = 1.6$  Hz, 1H), 5.30 (dd,  $J = 12.0, 4.8$  Hz, 1H), 4.80 (s, 1H), 4.08-4.20 (m, 2H), 3.80 (s, 3H), 3.58-3.71 (m, 2H), 3.42-3.49 (m, 1H), 2.53 (dd,  $J = 16.8, 4.8$  Hz, 1H), 1.26 (t,  $J = 7.0$  Hz, 3H), 1.13 (t,  $J = 7.0$  Hz, 3H) ppm;  $^{13}\text{C}$  NMR (100 MHz,  $\text{CDCl}_3$ )  $\delta$  191.91, 179.16, 175.13, 170.04, 167.01, 140.24, 130.68, 128.60, 127.71, 124.75, 110.07, 100.46, 92.87, 64.38, 61.70, 59.89, 56.24, 40.59, 29.20, 14.28, 13.11 ppm; ESI-HRMS: calcd. for  $\text{C}_{21}\text{H}_{22}\text{ClNO}_6 + \text{H}$  420.1214, found 420.1216.

**Ethyl-(E)-3-(5'-bromo-4-methoxy-2,2'-dioxospiro[cyclohexane-1,3'-indolin]-3-en-6-yl)-3-ethoxyacrylate (3f):** yield 48 mg (77%, white solid); mp 232-233 °C; IR (KBr) 3442, 2923, 2361, 2343, 2026, 1709, 1658, 1609  $\text{cm}^{-1}$ ;  $^1\text{H}$  NMR (400 MHz,  $\text{CDCl}_3$ )  $\delta$  7.83 (s, 1H), 7.31 (dd,  $J = 8.4, 1.6$  Hz, 1H), 7.21 (d,  $J = 1.6$  Hz, 1H), 6.69 (d,

$J = 8.0$  Hz, 1H), 5.50 (s, 1H), 5.30 (dd,  $J = 12.0, 4.8$  Hz, 1H), 4.80 (s, 1H), 4.07-4.22 (m, 2H), 3.80 (s, 3H), 3.57-3.72 (m, 2H), 3.42-3.50 (m, 1H), 2.52 (dd,  $J = 17.0, 4.8$  Hz, 1H), 1.27 (t,  $J = 7.0$  Hz, 3H), 1.13 (t,  $J = 7.0$  Hz, 3H) ppm;  $^{13}\text{C}$  NMR (100 MHz,  $\text{CDCl}_3$ )  $\delta$  191.95, 179.20, 175.08, 169.98, 167.01, 140.70, 131.48, 130.99, 127.47, 115.00, 110.62, 100.45, 92.87, 64.39, 61.64, 59.92, 56.26, 40.54, 29.13, 14.31, 13.11 ppm; ESI-HRMS: calcd. for  $\text{C}_{21}\text{H}_{22}\text{BrNO}_6 + \text{H}$  464.0709, found 464.0700.

**Ethyl-(E)-3-ethoxy-3-(5'-iodo-4-methoxy-2,2'-dioxospiro[cyclohexane-1,3'-indolin]-3-en-6-yl)acrylate (3g):** yield 42 mg (68%, white solid); mp 239-240 °C; IR (KBr) 3392, 2952, 2361, 2342, 2026, 1706, 1656, 1608  $\text{cm}^{-1}$ ;  $^1\text{H}$  NMR (400 MHz,  $\text{CDCl}_3$ )  $\delta$  7.81 (s, 1H), 7.50 (dd,  $J = 8.0, 1.6$  Hz, 1H), 7.37 (d,  $J = 1.6$  Hz, 1H), 6.59 (d,  $J = 8.0$  Hz, 1H), 5.50 (d,  $J = 1.6$  Hz, 1H), 5.30 (dd,  $J = 12.0, 4.8$  Hz, 1H), 4.80 (s, 1H), 4.10-4.22 (m, 2H), 3.80 (s, 3H), 3.66-3.72 (m, 1H), 3.61 (ddd,  $J = 17.2, 12.0, 1.6$  Hz, 1H), 3.43-3.50 (m, 1H), 2.51 (dd,  $J = 17.2, 4.8$  Hz, 1H), 1.29 (d,  $J = 7.0$  Hz, 3H), 1.13 (t,  $J = 7.0$  Hz, 3H) ppm;  $^{13}\text{C}$  NMR (100 MHz,  $\text{CDCl}_3$ )  $\delta$  191.88, 179.17, 174.74, 169.98, 167.00, 141.37, 137.41, 133.18, 131.34, 111.12, 100.49, 92.99, 84.82, 64.36, 61.52, 59.97, 56.23, 40.57, 29.15, 14.39, 13.14 ppm; ESI-HRMS: calcd. for  $\text{C}_{21}\text{H}_{22}\text{INO}_6 + \text{H}$  512.0570, found 512.0571.

**Ethyl-(E)-3-ethoxy-3-(4-methoxy-2,2'-dioxo-5'-(trifluoromethoxy)spiro[cyclohexane-1,3'-indolin]-3-en-6-yl)acrylate (3h):** yield 42 mg (67%, white solid); mp 188-189 °C; IR (KBr) 3397, 2945, 2360, 2341, 2026, 1714, 1657, 1606  $\text{cm}^{-1}$ ;  $^1\text{H}$  NMR (400 MHz,  $\text{CDCl}_3$ )  $\delta$  7.77 (s, 1H), 7.06 (dt,  $J = 8.4, 1.6$  Hz, 1H), 7.01 (d,  $J = 2.4$  Hz, 1H), 6.79 (d,  $J = 8.4$  Hz, 1H), 5.50 (d,  $J = 1.2$  Hz, 1H), 5.38 (dd,  $J = 12.4, 4.8$  Hz, 1H), 4.79 (s, 1H), 4.11 (q,  $J = 7.2$  Hz, 2H), 3.80 (s, 3H), 3.59-3.72 (m, 2H), 3.41-3.48 (m, 1H), 2.51 (dd,  $J = 17.2, 4.8$  Hz, 1H), 1.24 (t,  $J = 7.0$  Hz, 3H), 1.13 (t,  $J = 7.0$  Hz, 3H) ppm;  $^{13}\text{C}$  NMR (100 MHz,  $\text{CDCl}_3$ )  $\delta$  191.74, 179.21, 175.08, 169.98, 166.97, 144.45, 140.26, 130.36, 121.78, 119.22, 118.46, 109.46, 100.43, 92.88, 64.31, 61.82, 59.80, 56.26, 40.44, 29.21, 14.14, 13.10 ppm; ESI-HRMS: calcd. for  $\text{C}_{22}\text{H}_{22}\text{F}_3\text{NO}_7 + \text{H}$  470.1427, found 470.1433.

**Ethyl-(E)-3-ethoxy-3-(4-methoxy-5'-nitro-2,2'-dioxospiro[cyclohexane-1,3'-indolin]-3-en-6-yl)acrylate (3i):** yield 41 mg (64%, white solid); mp 243-244 °C; IR

(KBr) 3442, 2925, 2361,2343, 2026, 1710, 1657, 1605  $\text{cm}^{-1}$ ;  $^1\text{H}$  NMR (400 MHz,  $\text{CDCl}_3$ )  $\delta$  8.20 (dd,  $J = 8.4, 2.4$  Hz, 1H), 8.01 (d,  $J = 2.4$  Hz, 1H), 7.87 (s, 1H), 6.91 (d,  $J = 8.4$  Hz, 1H), 5.52 (d,  $J = 1.2$  Hz, 1H), 5.42 (dd,  $J = 12.0, 4.8$  Hz, 1H), 4.81 (s, 1H), 4.08-4.17 (m, 2H), 3.83 (s, 3H), 3.57-3.71 (m, 2H), 3.42-3.49 (m, 1H), 2.60 (dd,  $J = 17.2, 4.8$  Hz, 1H), 1.24 (t,  $J = 7.2$  Hz, 3H), 1.14 (t,  $J = 7.0$  Hz, 3H) ppm;  $^{13}\text{C}$  NMR (100 MHz,  $\text{CDCl}_3$ )  $\delta$  191.03, 179.56, 175.27, 169.37, 166.81, 147.56, 143.40, 129.93, 125.86, 120.39, 108.86, 100.20, 93.26, 64.47, 61.58, 60.14, 56.42, 40.46, 29.16, 14.18, 13.16 ppm; ESI-HRMS: calcd. for  $\text{C}_{21}\text{H}_{22}\text{N}_2\text{O}_8+\text{H}$  431.1454, found 431.1456.

**Ethyl-(E)-3-ethoxy-3-(6'-fluoro-4-methoxy-2,2'-dioxospiro[cyclohexane-1,3'-indolin]-3-en-6-yl)acrylate (3j):** yield 43 mg (66%, white solid); mp 212-213  $^\circ\text{C}$ ; IR (KBr) 3393, 2946, 2360, 2342, 2025, 1713, 1656, 1609  $\text{cm}^{-1}$ ;  $^1\text{H}$  NMR (400 MHz,  $\text{CDCl}_3$ )  $\delta$  7.98 (s, 1H), 7.02 (dd,  $J = 8.4, 5.4$  Hz, 1H), 6.66 (ddd,  $J = 9.6, 8.4, 2.4$  Hz, 1H), 6.56 (dd,  $J = 8.8, 2.4$  Hz, 1H), 5.51 (d,  $J = 1.2$  Hz, 1H), 5.30 (dd,  $J = 12.0, 4.8$  Hz, 1H), 4.79 (s, 1H), 4.11 (q,  $J = 7.2$  Hz, 2H), 3.80 (s, 3H), 3.57-3.71 (m, 2H), 3.42-3.50 (m, 1H), 2.52 (dd,  $J = 17.2, 4.8$  Hz, 1H), 1.25 (t,  $J = 7.2$  Hz, 3H), 1.14 (t,  $J = 7.0$  Hz, 3H) ppm;  $^{13}\text{C}$  NMR (100 MHz,  $\text{CDCl}_3$ )  $\delta$  192.32, 179.03, 175.87, 170.49, 167.02, 163.04 (d,  $J = 243.4$  Hz), 143.07 (d,  $J = 12.1$  Hz), 125.34 (d,  $J = 9.8$  Hz), 124.34 (d,  $J = 2.9$  Hz), 108.75 (d,  $J = 22.4$  Hz), 100.54, 97.89 (d,  $J = 27.2$  Hz), 92.62, 64.39, 60.97, 59.72, 56.21, 40.72, 29.36, 14.25, 13.06 ppm; ESI-HRMS: calcd. for  $\text{C}_{21}\text{H}_{22}\text{FNO}_6+\text{H}$  404.1509, found 404.1510.

**Ethyl-(E)-3-(6'-chloro-4-methoxy-2,2'-dioxospiro[cyclohexane-1,3'-indolin]-3-en-6-yl)-3-ethoxyacrylate (3k):** yield 21 mg (33%, white solid); mp 217-218  $^\circ\text{C}$ ; IR (KBr) 3441, 2925, 2361, 2343, 2026, 1712, 1662, 1610  $\text{cm}^{-1}$ ;  $^1\text{H}$  NMR (400 MHz,  $\text{CDCl}_3$ )  $\delta$  7.67 (s, 1H), 7.01 (d,  $J = 8.0$  Hz, 1H), 6.96 (d,  $J = 8.0$  Hz, 1H), 6.83 (d,  $J = 2.0$  Hz, 1H), 5.50 (s, 1H), 5.31 (dd,  $J = 12.0, 4.8$  Hz, 1H), 4.80 (s, 1H), 4.11 (q,  $J = 7.2$  Hz, 2H), 3.80 (s, 3H), 3.59-3.71 (m, 2H), 3.44-3.50 (m, 1H), 2.52 (dd,  $J = 17.2, 4.8$  Hz, 1H), 1.25 (t,  $J = 7.0$  Hz, 3H), 1.15 (t,  $J = 7.0$  Hz, 3H) ppm;  $^{13}\text{C}$  NMR (100 MHz,  $\text{CDCl}_3$ )  $\delta$  192.08, 179.10, 175.46, 170.36, 167.01, 142.79, 134.20, 127.39, 125.19, 122.45, 109.82, 100.47, 92.65, 64.43, 61.05, 59.76, 56.26, 40.58, 29.34, 14.25, 13.11 ppm; ESI-HRMS: calcd. for  $\text{C}_{21}\text{H}_{22}\text{ClNO}_6+\text{H}$  420.1214, found 420.1213.

**Ethyl-(E)-3-(6'-bromo-4-methoxy-2,2'-dioxospiro[cyclohexane-1,3'-indolin]-3-en-6-yl)-3-ethoxyacrylate (3l):** yield 48 mg (76%, white solid); mp 206-207 °C; IR (KBr) 3441, 2941, 2360, 2342, 2026, 1712, 1662, 1610; <sup>1</sup>H NMR (400 MHz, CDCl<sub>3</sub>) δ 7.79 (s, 1H), 7.11 (d, *J* = 7.6 Hz, 1H), 6.98 (s, 1H), 6.95 (d, *J* = 8.0 Hz, 1H), 5.50 (s, 1H), 5.30 (dd, *J* = 12.0, 4.8 Hz, 1H), 4.80 (s, 1H), 4.11 (q, *J* = 7.2 Hz, 2H), 3.80 (s, 3H), 3.56-3.71 (m, 2H), 3.43-3.52 (m, 1H), 2.52 (dd, *J* = 17.2, 4.8 Hz, 1H), 1.25 (t, *J* = 7.0 Hz, 3H), 1.15 (t, *J* = 7.0 Hz, 3H) ppm; <sup>13</sup>C NMR (100 MHz, CDCl<sub>3</sub>) δ 191.94, 179.09, 175.26, 170.34, 167.00, 142.93, 127.95, 125.57, 125.37, 122.12, 112.53, 100.45, 92.67, 64.44, 61.10, 59.77, 56.26, 40.51, 29.33, 14.26, 13.13 ppm; ESI-HRMS: calcd. for C<sub>21</sub>H<sub>22</sub>BrNO<sub>6</sub>+H 464.0709, found 464.0711.

**Ethyl-(E)-3-ethoxy-3-(7'-fluoro-4-methoxy-2,2'-dioxospiro[cyclohexane-1,3'-indolin]-3-en-6-yl)acrylate (3m):** yield 55 mg (84%, white solid); mp 168-169 °C; IR (KBr) 3301, 2943, 2360, 2342, 2026, 1727, 1709, 1603 cm<sup>-1</sup>; <sup>1</sup>H NMR (400 MHz, CDCl<sub>3</sub>) δ 7.44 (s, 1H), 6.91-7.00 (m, 2H), 6.88 (dd, *J* = 7.2, 1.2 Hz, 1H), 5.50 (d, *J* = 1.2 Hz, 1H), 5.30 (dd, *J* = 12.0, 4.8 Hz, 1H), 4.79 (s, 1H), 4.11 (q, *J* = 7.2 Hz, 2H), 3.80 (s, 3H), 3.67-3.74 (m, 1H), 3.60 (ddd, *J* = 16.8, 12.0, 1.6 Hz, 1H), 3.43-3.51 (m, 1H), 2.54 (dd, *J* = 17.2, 4.8 Hz, 1H), 1.25 (t, *J* = 7.2 Hz, 3H), 1.16 (t, *J* = 7.0 Hz, 3H) ppm; <sup>13</sup>C NMR (100 MHz, CDCl<sub>3</sub>) δ 191.85, 179.04, 174.14, 170.43, 166.97, 146.53 (d, *J* = 241.3 Hz), 131.64 (d, *J* = 3.5 Hz), 128.81 (d, *J* = 12.2 Hz), 123.02 (d, *J* = 5.8 Hz), 119.90 (d, *J* = 3.4 Hz), 115.55 (d, *J* = 16.8 Hz), 100.38, 92.59, 64.40, 61.54, 61.52, 59.73, 56.21, 40.80, 29.33, 14.25, 13.04 ppm; ESI-HRMS: calcd. for C<sub>21</sub>H<sub>22</sub>FNO<sub>6</sub>+H 404.1509, found 404.1513.

**Ethyl-(E)-3-(7'-chloro-4-methoxy-2,2'-dioxospiro[cyclohexane-1,3'-indolin]-3-en-6-yl)-3-ethoxyacrylate (3n):** yield 56 mg (86%, white solid); mp 144-145 °C; IR (KBr) 3440, 2940, 2392, 2349, 2026, 1714, 1661, 1612 cm<sup>-1</sup>; <sup>1</sup>H NMR (400 MHz, CDCl<sub>3</sub>) δ 7.46 (s, 1H), 7.19 (dd, *J* = 8.0, 1.2 Hz, 1H), 6.98 (dd, *J* = 7.6, 1.2 Hz, 1H), 6.94 (t, *J* = 7.6 Hz, 1H), 5.50 (d, *J* = 1.6 Hz, 1H), 5.26-5.31 (m, 1H), 4.79 (s, 1H), 4.11 (q, *J* = 7.2 Hz, 2H), 3.80 (s, 3H), 3.66-3.73 (m, 1H), 3.56-3.63 (m, 1H), 3.42-3.50 (m, 1H), 2.55 (dd, *J* = 17.2, 4.8 Hz, 1H), 1.25 (t, *J* = 7.2 Hz, 3H), 1.15 (t, *J* = 7.0 Hz, 3H) ppm; <sup>13</sup>C NMR (100 MHz, CDCl<sub>3</sub>) δ 191.75, 179.04, 173.93, 170.39, 166.95,

139.31, 130.26, 128.40, 123.30, 122.48, 114.22, 100.35, 92.54, 64.45, 62.22, 59.74, 56.23, 40.91, 29.35, 14.24, 12.97 ppm; ESI-HRMS: calcd. for C<sub>21</sub>H<sub>22</sub>ClNO<sub>6</sub>+H 420.1214, found 420.1213.

**Ethyl-(E)-3-(7'-bromo-4-methoxy-2,2'-dioxospiro[cyclohexane-1,3'-indolin]-3-en-6-yl)-3-ethoxyacrylate (3o):** yield 55 mg (88%, white solid); mp 204-205 °C; IR (KBr) 3446, 2942, 2361, 2342, 2026, 1715, 1701, 1649, 1602 cm<sup>-1</sup>; <sup>1</sup>H NMR (400 MHz, CDCl<sub>3</sub>) δ 7.39 (s, 1H), 7.32 (dd, *J* = 8.0, 0.8 Hz, 1H), 7.02 (dt, *J* = 7.2, 0.8 Hz, 1H), 6.88 (t, *J* = 8.0 Hz, 1H), 5.50 (d, *J* = 1.6 Hz, 1H), 5.27 (dd, *J* = 12.0, 4.8 Hz, 1H), 4.79 (s, 1H), 4.11 (q, *J* = 7.2 Hz, 2H), 3.80 (s, 3H), 3.67-3.73 (m, 1H), 3.59 (ddd, *J* = 17.2, 12.4, 1.6 Hz, 1H), 3.43-3.48 (m, 1H), 2.55 (dd, *J* = 16.8, 4.8 Hz, 1H), 1.24 (t, *J* = 7.2 Hz, 3H), 1.15 (t, *J* = 7.0 Hz, 3H) ppm; <sup>13</sup>C NMR (100 MHz, CDCl<sub>3</sub>) δ 191.67, 179.00, 173.58, 170.40, 166.94, 140.97, 131.14, 130.21, 123.67, 123.12, 102.04, 100.37, 92.62, 64.46, 62.60, 59.73, 56.22, 41.05, 29.41, 14.26, 13.01 ppm; ESI-HRMS: calcd. for C<sub>21</sub>H<sub>22</sub>BrNO<sub>6</sub>+H 464.0709, found 464.0710.

**Ethyl-(E)-3-(5',6'-difluoro-4-methoxy-2,2'-dioxospiro[cyclohexane-1,3'-indolin]-3-en-6-yl)-3-ethoxyacrylate (3p):** yield 43 mg (66%, white solid); mp 212-213 °C; IR (KBr) 3395, 2946, 2357, 2329, 2026, 1713, 1657, 1610 cm<sup>-1</sup>; <sup>1</sup>H NMR (400 MHz, CDCl<sub>3</sub>) δ 7.86 (s, 1H), 6.95 (dd, *J* = 9.6, 7.8 Hz, 1H), 6.66 (dd, *J* = 10.0, 6.4 Hz, 1H), 5.50 (s, 1H), 5.29 (dd, *J* = 12.0, 4.8 Hz, 1H), 4.82 (s, 1H), 4.08-4.12 (m, 2H), 3.81 (s, 3H), 3.57-3.72 (m, 2H), 3.44-3.52 (m, 1H), 2.51 (dd, *J* = 17.2, 4.8 Hz, 1H), 1.27 (t, *J* = 7.0 Hz, 3H), 1.15 (t, *J* = 7.0 Hz, 3H) ppm; <sup>13</sup>C NMR (100 MHz, CDCl<sub>3</sub>) δ 191.83, 179.26, 175.82, 169.93, 167.01, 150.48 (dd, *J* = 246, 13.8 Hz), 146.58 (dd, *J* = 246, 13.8 Hz), 137.98 (dd, *J* = 10, 2.5 Hz), 124.35 (dd, *J* = 6.6, 3.8 Hz), 113.91 (d, *J* = 20.4, Hz), 100.37, 99.38 (d, *J* = 22.7 Hz), 92.85, 64.45, 61.59, 59.89, 56.30, 40.49, 29.17, 14.20, 13.04 ppm; ESI-HRMS: calcd. for C<sub>21</sub>H<sub>21</sub>F<sub>2</sub>NO<sub>6</sub>+H 422.1415, found 422.1425.

**Ethyl-(E)-3-ethoxy-3-(4-methoxy-1'-methyl-2,2'-dioxospiro[cyclohexane-1,3'-indolin]-3-en-6-yl)acrylate (3q):** yield 45 mg (68%, white solid); mp 188-189 °C; IR (KBr) 2935, 2360, 2341, 2026, 1740, 1658, 1608 cm<sup>-1</sup>; <sup>1</sup>H NMR (400 MHz, CDCl<sub>3</sub>) δ 7.25 (t, *J* = 7.6 Hz, 1H), 7.09 (d, *J* = 7.6 Hz, 1H), 7.00 (t, *J* = 7.6 Hz, 1H), 6.77 (d, *J* = 7.6 Hz, 1H), 5.50 (d, *J* = 1.2 Hz, 1H), 5.32 (dd, *J* = 12.0, 4.8 Hz, 1H), 4.75 (s, 1H),



4.11 (q,  $J = 7.2$  Hz, 2H), 3.79 (s, 3H), 3.57-3.69 (m, 2H), 3.30-3.39 (m, 1H), 3.14 (s, 3H), 2.53 (dd,  $J = 16.8, 4.8$  Hz, 1H), 1.24 (t,  $J = 7.2$  Hz, 3H), 1.04 (t,  $J = 7.0$  Hz, 3H) ppm;  $^{13}\text{C}$  NMR (100 MHz,  $\text{CDCl}_3$ )  $\delta$  192.77, 178.88, 173.23, 170.91, 166.97, 144.46, 128.55, 128.29, 123.79, 122.44, 107.44, 100.60, 92.47, 63.92, 60.83, 59.65, 56.13, 40.72, 29.56, 26.18, 14.27, 13.48 ppm; ESI-HRMS: calcd. for  $\text{C}_{22}\text{H}_{25}\text{NO}_6 + \text{H}$  400.1760, found 400.1768.

**Ethyl-(E)-3-(5'-chloro-4-methoxy-1'-methyl-2,2'-dioxospiro[cyclohexane-1,3'-indolin]-3-en-6-yl)-3-ethoxyacrylate (3r):** yield 52 mg (82%, white solid); mp 162-163 °C; IR (KBr) 2940, 2361, 2342, 2026, 1727, 1657, 1606  $\text{cm}^{-1}$ ;  $^1\text{H}$  NMR (400 MHz,  $\text{CDCl}_3$ )  $\delta$  7.23 (dd,  $J = 8.4, 2.0$  Hz, 1H), 7.09 (d,  $J = 2.0$  Hz, 1H), 6.69 (d,  $J = 8.4$  Hz, 1H), 5.49 (d,  $J = 1.6$  Hz, 1H), 5.30 (dd,  $J = 12.0, 4.8$  Hz, 1H), 4.78 (s, 1H), 4.08-4.20 (m, 2H), 3.80 (s, 3H), 3.59-3.67 (m, 2H), 3.35-3.43 (m, 1H), 3.12 (s, 3H), 2.53 (dd,  $J = 17.2, 4.8$  Hz, 1H), 1.26 (t,  $J = 7.0$  Hz, 3H), 1.07 (t,  $J = 7.0$  Hz, 3H) ppm;  $^{13}\text{C}$  NMR (100 MHz,  $\text{CDCl}_3$ )  $\delta$  191.96, 179.09, 172.70, 170.19, 166.93, 143.07, 129.97, 128.55, 127.80, 124.49, 108.27, 100.43, 92.90, 63.98, 61.16, 59.86, 56.19, 40.56, 29.36, 26.28, 14.28, 13.53 ppm; ESI-HRMS: calcd. for  $\text{C}_{22}\text{H}_{24}\text{ClNO}_6 + \text{H}$  434.1371, found 434.1379.

**Ethyl-(E)-3-(5'-bromo-4-methoxy-1'-methyl-2,2'-dioxospiro[cyclohexane-1,3'-indolin]-3-en-6-yl)-3-ethoxyacrylate (3s):** yield 50 mg (80%, white solid); mp 186-187 °C; IR (KBr) 2939, 2360, 2342, 2026, 1731, 1647, 1610  $\text{cm}^{-1}$ ;  $^1\text{H}$  NMR (400 MHz,  $\text{CDCl}_3$ )  $\delta$  7.38 (dd,  $J = 8.0, 2.0$  Hz, 1H), 7.22 (d,  $J = 2.0$  Hz, 1H), 6.64 (d,  $J = 8.0$  Hz, 1H), 5.49 (d,  $J = 1.2$  Hz, 1H), 5.30 (dd,  $J = 12.0, 4.8$  Hz, 1H), 4.78 (s, 1H), 4.09-4.20 (m, 2H), 3.80 (s, 3H), 3.59-3.67 (m, 2H), 3.36-3.43 (m, 1H), 3.12 (s, 3H), 2.53 (dd,  $J = 16.8, 4.8$  Hz, 1H), 1.26 (t,  $J = 7.0$  Hz, 3H), 1.07 (t,  $J = 7.0$  Hz, 3H) ppm;  $^{13}\text{C}$  NMR (100 MHz,  $\text{CDCl}_3$ )  $\delta$  191.94, 179.10, 172.57, 170.13, 166.93, 143.52, 131.44, 130.29, 127.20, 115.10, 108.79, 100.42, 92.91, 63.97, 61.11, 59.89, 56.20, 40.53, 29.31, 26.24, 14.30, 13.54 ppm; ESI-HRMS: calcd. for  $\text{C}_{21}\text{H}_{24}\text{BrNO}_6 + \text{H}$  478.0865, found 478.0872.

**Ethyl-(E)-3-(1'-benzyl-4-methoxy-2,2'-dioxospiro[cyclohexane-1,3'-indolin]-3-en-6-yl)-3-ethoxyacrylate (3t):** yield 48 mg (77%, white solid); mp 159-160 °C; IR (KBr)

2943, 2361, 2341, 2026, 1709, 1656, 1610  $\text{cm}^{-1}$ ;  $^1\text{H}$  NMR (400 MHz,  $\text{CDCl}_3$ )  $\delta$  7.23-7.29 (m, 5H), 6.51 (d,  $J = 8.0$  Hz, 1H), 5.52 (d,  $J = 1.2$  Hz, 1H), 5.36 (dd,  $J = 12.0, 4.8$  Hz, 1H), 5.17 (d,  $J = 15.6$  Hz, 1H), 4.81 (s, 1H), 4.46 (d,  $J = 15.6$  Hz, 1H), 4.10-4.21 (m, 2H), 3.81 (s, 3H), 3.59-3.72 (m, 2H), 3.39-3.46 (m, 1H), 2.55 (dd,  $J = 17.2, 4.8$  Hz, 1H), 1.28 (t,  $J = 7.0$  Hz, 3H), 1.01 (t,  $J = 7.0$  Hz, 3H) ppm;  $^{13}\text{C}$  NMR (100 MHz,  $\text{CDCl}_3$ )  $\delta$  191.89, 179.08, 172.85, 170.10, 166.99, 142.78, 135.20, 131.38, 130.49, 128.80, 127.60, 127.21, 126.99, 115.24, 109.85, 100.43, 93.06, 64.05, 61.20, 59.92, 56.21, 43.61, 40.31, 29.36, 14.32, 13.37 ppm; ESI-HRMS: calcd. for  $\text{C}_{28}\text{H}_{28}\text{BrNO}_6+\text{H}$  554.1178, found 554.1172.

**Ethyl-(E)-3-(1'-benzyl-5'-chloro-4-methoxy-2,2'-dioxospiro[cyclohexane-1,3'-indolin]-3-en-6-yl)-3-ethoxyacrylate (3u):** yield 55 mg (90%, white solid); mp 84-85  $^\circ\text{C}$ ; IR (KBr) 2938, 2361, 2342, 2025, 1722, 1693, 1655, 1610  $\text{cm}^{-1}$ ;  $^1\text{H}$  NMR (400 MHz,  $\text{CDCl}_3$ )  $\delta$  7.23-7.30 (m, 5H), 7.12 (dd,  $J = 6.4, 2.4$  Hz, 2H), 6.56 (d,  $J = 8.8$  Hz, 1H), 5.53 (d,  $J = 1.2$  Hz, 1H), 5.36 (dd,  $J = 12.0, 4.8$  Hz, 1H), 5.18 (d,  $J = 16.0$  Hz, 1H), 4.81 (s, 1H), 4.46 (d,  $J = 16.0$  Hz, 1H), 4.10-4.20 (m, 2H), 3.81 (s, 3H), 3.59-3.72 (m, 2H), 3.39-3.46 (m, 1H), 2.56 (dd,  $J = 17.2, 4.8$  Hz, 1H), 1.27 (t,  $J = 7.0$  Hz, 3H), 1.01 (t,  $J = 7.0$  Hz, 3H) ppm;  $^{13}\text{C}$  NMR (100 MHz,  $\text{CDCl}_3$ )  $\delta$  191.92, 179.07, 172.98, 170.15, 167.00, 142.31, 135.25, 130.16, 128.80, 128.50, 127.91, 127.60, 127.01, 124.47, 109.34, 100.44, 93.03, 64.06, 61.24, 59.90, 56.21, 43.65, 40.34, 29.40, 14.30, 13.36 ppm; ESI-HRMS: calcd. for  $\text{C}_{28}\text{H}_{28}\text{ClNO}_6+\text{H}$  510.1683, found 510.1688.

**Ethyl-(E)-3-(1'-benzyl-5'-bromo-4-methoxy-2,2'-dioxospiro[cyclohexane-1,3'-indolin]-3-en-6-yl)-3-ethoxyacrylate (3v):** yield 54 mg (90%, white solid); mp 159-160  $^\circ\text{C}$ ; IR (KBr) 2939, 2361, 2342, 1723, 1707, 1651, 1611  $\text{cm}^{-1}$ ;  $^1\text{H}$  NMR (400 MHz,  $\text{CDCl}_3$ )  $\delta$  7.23-7.29 (m, 5H), 6.51 (d,  $J = 8.0$  Hz, 1H), 5.52 (d,  $J = 1.2$  Hz, 1H), 5.36 (dd,  $J = 12.0, 4.8$  Hz, 1H), 5.17 (d,  $J = 15.6$  Hz, 1H), 4.81 (s, 1H), 4.46 (d,  $J = 15.6$  Hz, 1H), 4.10-4.21 (m, 2H), 3.81 (s, 3H), 3.59-3.72 (m, 2H), 3.39-3.46 (m, 1H), 2.55 (dd,  $J = 17.2, 4.8$  Hz, 1H), 1.28 (t,  $J = 7.0$  Hz, 3H), 1.01 (t,  $J = 7.0$  Hz, 3H) ppm;  $^{13}\text{C}$  NMR (100 MHz,  $\text{CDCl}_3$ )  $\delta$  191.89, 179.08, 172.85, 170.10, 166.99, 142.78, 135.20, 131.38, 130.49, 128.80, 127.60, 127.21, 126.99, 115.24, 109.85, 100.43, 93.06, 64.05, 61.20, 59.92, 56.21, 43.61, 40.31, 29.36, 14.32, 13.37 ppm; ESI-HRMS: calcd. for

$C_{28}H_{28}BrNO_6+H$  554.1178, found 554.1172.

**tert-butyl-(E)-6-(1,3-diethoxy-3-oxoprop-1-en-1-yl)-4-methoxy-2,2'-dioxospiro[cyclohexane-1,3'-indolin]-3-ene-1'-carboxylate (3w):** yield 38 mg (62%, brown oil); IR (KBr) 2931, 2360, 2341, 2026, 1764, 1723, 1704, 1661, 1609  $cm^{-1}$ ;  $^1H$  NMR (400 MHz,  $CDCl_3$ )  $\delta$  7.83 (d,  $J = 8.0$  Hz, 1H), 7.29 (td,  $J = 7.2, 1.6$  Hz, 1H), 7.12 (td,  $J = 7.2, 0.8$  Hz, 1H), 7.08 (dd,  $J = 7.6, 1.6$  Hz, 1H), 5.51 (d,  $J = 1.2$  Hz, 1H), 5.28 (dd,  $J = 12.0, 4.8$  Hz, 1H), 4.77 (s, 1H), 4.11 (q,  $J = 7.2$  Hz, 2H), 3.79 (s, 3H), 3.52-3.65 (m, 2H), 3.32-3.40 (m, 1H), 2.58 (dd,  $J = 17.2, 4.8$  Hz, 1H), 1.60 (s, 9H), 1.24 (t,  $J = 7.2$  Hz, 3H), 1.12 (t,  $J = 7.0$  Hz, 3H) ppm;  $^{13}C$  NMR (100 MHz,  $CDCl_3$ )  $\delta$  191.98, 179.05, 170.91, 170.27, 166.87, 149.20, 140.85, 128.41, 127.46, 126.87, 124.35, 123.52, 114.51, 100.39, 92.70, 83.98, 65.09, 64.33, 59.72, 56.16, 41.65, 29.56, 28.00, 14.17, 12.99 ppm; ESI-HRMS: calcd. for  $C_{26}H_{31}NO_8+H$  486.2128, found 486.2122.

**Ethyl-(E)-3-ethoxy-3-(1'-(ethoxymethyl)-4-methoxy-2,2'-dioxospiro[cyclohexane-1,3'-indolin]-3-en-6-yl)acrylate (3x):** yield 52 mg (81%, brown oil); IR (KBr) 2937, 2361, 2342, 2026, 1719, 1659, 1611  $cm^{-1}$ ;  $^1H$  NMR (400 MHz,  $CDCl_3$ )  $\delta$  7.28 (td,  $J = 8.0, 1.2$  Hz, 1H), 7.11 (dd,  $J = 7.6, 1.2$  Hz, 1H), 7.04 (dd,  $J = 7.6, 0.8$  Hz, 1H), 7.00 (d,  $J = 8.0$  Hz, 1H), 5.50 (d,  $J = 1.2$  Hz, 1H), 5.34 (dd,  $J = 12.0, 4.8$  Hz, 1H), 5.23 (d,  $J = 10.8$  Hz, 1H), 4.96 (d,  $J = 10.8$  Hz, 1H), 4.77 (s, 1H), 4.11 (q,  $J = 7.2$  Hz, 2H), 3.79 (s, 3H), 3.41-3.66 (m, 5H), 2.55 (dd,  $J = 17.2, 4.8$  Hz, 1H), 1.25 (t,  $J = 7.2$  Hz, 3H), 1.14 (t,  $J = 7.0$  Hz, 3H), 1.01 (t,  $J = 7.0$  Hz, 3H) ppm;  $^{13}C$  NMR (100 MHz,  $CDCl_3$ )  $\delta$  192.56, 178.81, 173.88, 170.53, 166.94, 142.85, 128.61, 127.80, 123.72, 122.89, 108.91, 100.49, 92.53, 69.69, 63.99, 61.01, 59.64, 56.11, 40.56, 29.44, 14.76, 14.22, 13.10 ppm; ESI-HRMS: calcd. for  $C_{24}H_{29}NO_7+H$  444.2022, found 444.2029.

**Ethyl-(E)-3-(3-bromo-4-methoxy-2,2'-dioxospiro[cyclohexane-1,3'-indolin]-3-en-6-yl)-3-ethoxyacrylate (4):** yield 16 mg (27%, white solid); mp 239-240  $^{\circ}C$ ; IR (KBr) 3446, 2940, 2360, 2342, 2026, 1715, 1701, 1662, 1654, 1623  $cm^{-1}$ ;  $^1H$  NMR (400 MHz,  $CDCl_3$ )  $\delta$  7.60 (s, 1H), 7.21 (td,  $J = 8.0, 1.2$  Hz, 1H), 7.06 (d,  $J = 7.6$  Hz, 1H), 6.98 (t,  $J = 7.6$  Hz, 1H), 6.81 (d,  $J = 8.0$  Hz, 1H), 5.30 (dd,  $J = 11.4, 5.0$  Hz, 1H), 4.82 (s, 1H), 4.10-4.16 (m, 2H), 4.04 (s, 3H), 3.65-3.72 (m, 2H), 3.40-3.45 (m, 1H), 2.89

(dd,  $J = 17.0, 5.0$  Hz, 1H), 1.26 (t,  $J = 7.2$  Hz, 3H), 1.12 (t,  $J = 7.0$  Hz, 3H) ppm;  $^{13}\text{C}$  NMR (100 MHz, DMSO)  $\delta$  185.25, 175.42, 173.42, 169.79, 166.43, 142.85, 128.68, 128.43, 123.78, 121.27, 109.01, 99.07, 92.69, 79.17, 64.42, 60.91, 59.29, 57.24, 27.02, 14.17, 12.90 ppm; ESI-HRMS: calcd. for  $\text{C}_{21}\text{H}_{22}\text{BrNO}_6+\text{H}$  466.0691, found 466.0687.

**Ethyl-(E)-3-ethoxy-3-((1S,6R)-4-methoxy-3-(benzen-2-yl)-2,2'-**

**dioxospiro[cyclohexane-1,3'-indolin]-3-en-6-yl)acrylate (5g-Ph):** yield 25 mg (56%, white solid); mp 248-249 °C; IR (KBr) 3446, 2944, 2360, 2342, 2026, 1703, 1657, 1622, 1606  $\text{cm}^{-1}$ ;  $^1\text{H}$  NMR (400 MHz,  $\text{CDCl}_3$ )  $\delta$  7.88 (s, 1H), 7.49 – 7.52 (m, 2H), 7.46 (dd,  $J = 8.0, 2.0$  Hz, 1H), 7.37-7.41 (m, 3H), 7.29-7.32 (m, 1H), 6.90 (d,  $J = 8.4$  Hz, 1H), 5.57 (d,  $J = 1.6$  Hz, 1H), 5.45 (dd,  $J = 12.0, 4.8$  Hz, 1H), 4.80 (s, 1H), 4.02-4.10 (m, 2H), 3.84 (s, 3H), 3.66-3.74 (m, 2H), 3.51-3.46 (m, 1H), 2.56 (dd,  $J = 17.2, 4.8$  Hz, 1H), 1.15-1.20 (m, 6H) ppm;  $^{13}\text{C}$  NMR (100 MHz,  $\text{CDCl}_3$ )  $\delta$  192.60, 179.07, 175.38, 170.57, 167.11, 140.84, 135.54, 129.47, 128.55, 127.41, 126.71, 123.20, 109.32, 100.68, 92.67, 64.33, 61.58, 59.68, 56.22, 40.70, 29.24, 14.14, 13.17 ppm; ESI-HRMS: calcd. for  $\text{C}_{27}\text{H}_{27}\text{NO}_6+\text{H}$  462.1917, found 462.1917.

**Ethyl-(E)-3-ethoxy-3-(4-methoxy-3-(naphthalen-2-yl)-2,2'-**

**dioxospiro[cyclohexane-1,3'-indolin]-3-en-6-yl)acrylate (5g-Naph):** yield 38 mg (77%, white solid); mp 253-254 °C; IR (KBr) 3446, 2931, 2360, 2342, 2026, 1719, 1700, 1684, 1670, 1653, 1647  $\text{cm}^{-1}$ ;  $^1\text{H}$  NMR (400 MHz,  $\text{CDCl}_3$ )  $\delta$  8.13 (s, 1H), 7.94 (d,  $J = 1.6$  Hz, 1H), 7.81-7.85 (m, 3H), 7.65 (dd,  $J = 8.4, 1.6$  Hz, 1H), 7.56 (dd,  $J = 8.0, 1.6$  Hz, 1H), 7.50 (d,  $J = 1.6$  Hz, 1H), 7.44-7.48 (m, 2H), 6.92 (d,  $J = 8.0$  Hz, 1H), 5.57 (d,  $J = 1.6$  Hz, 1H), 5.48 (dd,  $J = 12.0, 4.8$  Hz, 1H), 4.79 (s, 1H), 3.97-4.07 (m, 2H), 3.82 (s, 3H), 3.67-3.73 (m, 2H), 3.46-3.51 (m, 1H), 2.56 (dd,  $J = 17.0, 4.8$  Hz, 1H), 1.18 (t,  $J = 7.0$  Hz, 3H), 1.09 (t,  $J = 7.0$  Hz, 3H) ppm;  $^{13}\text{C}$  NMR (100 MHz,  $\text{CDCl}_3$ )  $\delta$  192.89, 179.30, 175.77, 170.50, 167.13, 141.17, 138.18, 135.35, 133.64, 132.31, 129.63, 128.13, 127.98, 127.74, 127.51, 126.12, 125.58, 125.35, 125.04, 123.36, 109.67, 100.76, 92.73, 64.40, 61.74, 59.67, 56.23, 40.78, 29.28, 14.09, 13.12 ppm; ESI-HRMS: calcd. for  $\text{C}_{31}\text{H}_{29}\text{NO}_6+\text{H}$  512.2073, found 512.2074.

**Ethyl-(E)-3-ethoxy-4-((E)-2-oxoindolin-3-ylidene)but-2-enoate (1a):** yield 374 mg (96%, orange solid); mp 135-136 °C;  $^1\text{H}$  NMR (400 MHz,  $\text{CDCl}_3$ )  $\delta$  8.49 (s, 1H), 8.25

(s, 1H), 7.86 (d,  $J = 7.6$  Hz, 1H), 7.24 (t,  $J = 8.0$  Hz, 1H), 6.95 (t,  $J = 7.8$  Hz, 1H), 6.87 (d,  $J = 8.0$  Hz, 1H), 5.45 (s, 1H), 4.21 (q,  $J = 7.2$  Hz, 2H), 4.11 (q,  $J = 7.2$  Hz, 2H), 1.53 (t,  $J = 7.0$  Hz, 3H), 1.30 (t,  $J = 7.0$  Hz, 3H) ppm;  $^{13}\text{C}$  NMR (100 MHz,  $\text{CDCl}_3$ )  $\delta$  170.42, 166.36, 164.34, 142.95, 130.82, 130.73, 126.96, 121.72, 121.18, 110.33, 98.69, 64.70, 60.25, 14.31, 14.16 ppm; ESI-HRMS: calcd. for  $\text{C}_{16}\text{H}_{17}\text{NO}_4+\text{H}$  288.1236, found 288.1230.

**Ethyl-(E)-3-ethoxy-4-((E)-5-methyl-2-oxoindolin-3-ylidene)but-2-enoate (1b):** yield 299 mg (80%, orange solid); mp 181-182 °C;  $^1\text{H}$  NMR (400 MHz,  $\text{CDCl}_3$ )  $\delta$  8.24 (s, 1H), 8.09 (s, 1H), 7.75 (s, 1H), 7.04 (d,  $J = 7.6$  Hz, 1H), 6.74 (d,  $J = 8.0$  Hz, 1H), 5.45 (s, 1H), 4.21 (q,  $J = 7.2$  Hz, 2H), 4.11 (q,  $J = 7.2$  Hz, 2H), 2.30 (s, 3H), 1.56 (t,  $J = 7.0$  Hz, 3H), 1.30 (t,  $J = 7.0$  Hz, 3H) ppm;  $^{13}\text{C}$  NMR (100 MHz,  $\text{DMSO}-d_6$ )  $\delta$  168.83, 165.91, 164.24, 141.86, 131.55, 131.13, 129.97, 127.66, 124.88, 120.48, 109.71, 98.29, 64.99, 59.66, 20.63, 14.25, 14.07 ppm; ESI-HRMS: calcd. for  $\text{C}_{17}\text{H}_{19}\text{NO}_4+\text{H}$  302.1392, found 302.1391.

**Ethyl-(E)-3-ethoxy-4-((E)-5-methoxy-2-oxoindolin-3-ylidene)but-2-enoate (1c):** yield 197 mg (55%, brick red solid); mp 181-182 °C;  $^1\text{H}$  NMR (400 MHz,  $\text{CDCl}_3$ )  $\delta$  8.23 (s, 1H), 8.21 (s, 1H), 7.46 (d,  $J = 2.4$  Hz, 1H), 6.80 (dd,  $J = 8.4, 2.4$  Hz, 1H), 6.76 (d,  $J = 8.4$  Hz, 1H), 5.45 (s, 1H), 4.21 (q,  $J = 7.2$  Hz, 2H), 4.11 (q,  $J = 7.2$  Hz, 2H), 3.78 (s, 3H), 1.54 (t,  $J = 7.0$  Hz, 3H), 1.30 (t,  $J = 7.0$  Hz, 3H) ppm;  $^{13}\text{C}$  NMR (100 MHz,  $\text{CDCl}_3$ )  $\delta$  170.32, 166.29, 164.25, 155.16, 136.80, 131.17, 127.20, 122.10, 115.62, 114.13, 110.32, 98.86, 64.74, 60.26, 55.98, 14.32, 14.28 ppm; ESI-HRMS: calcd. for  $\text{C}_{17}\text{H}_{19}\text{NO}_5+\text{H}$  318.1342, found 318.1344.

**Ethyl-(E)-3-ethoxy-4-((E)-5-fluoro-2-oxoindolin-3-ylidene)but-2-enoate (1d):** yield 355 mg (96%, orange solid); mp 188-189 °C;  $^1\text{H}$  NMR (400 MHz,  $\text{CDCl}_3$ )  $\delta$  8.49 (s, 1H), 8.35 (s, 1H), 7.67 (dd,  $J = 9.6, 2.8$  Hz, 1H), 6.96 (td,  $J = 8.4, 2.8$  Hz, 1H), 6.80 (dd,  $J = 8.4, 4.4$  Hz, 1H), 5.48 (s, 1H), 4.22 (q,  $J = 7.2$  Hz, 2H), 4.12 (q,  $J = 7.2$  Hz, 2H), 1.57 (t,  $J = 7.0$  Hz, 3H), 1.31 (t,  $J = 7.2$  Hz, 3H) ppm;  $^{13}\text{C}$  NMR (100 MHz,  $\text{CDCl}_3$ )  $\delta$  170.18, 166.18, 163.80, 138.92, 132.07 (d,  $J = 9.8$  Hz), 131.94 (d,  $J = 2.4$  Hz), 128.49 (d,  $J = 12.0$  Hz), 128.04, 117.03 (d,  $J = 23.9$  Hz), 114.53 (d,  $J = 26.3$  Hz),

110.48 (d,  $J = 7.8$  Hz), 99.61, 64.91, 60.36, 14.31, 14.16 ppm; ESI-HRMS: calcd. for  $C_{16}H_{16}FNO_4+H$  306.1142, found 306.1136.

**Ethyl-(E)-4-((E)-5-chloro-2-oxoindolin-3-ylidene)-3-ethoxybut-2-enoate (Ie):** yield 223 mg (63%, orange solid); mp 181-182 °C;  $^1H$  NMR (400 MHz,  $CDCl_3$ )  $\delta$  8.69 (s, 1H), 8.38 (s, 1H), 7.98 (d,  $J = 2.4$  Hz, 1H), 7.21 (dd,  $J = 8.4, 2.4$  Hz, 1H), 6.82 (d,  $J = 8.4$  Hz, 1H), 5.49 (s, 1H), 4.22 (q,  $J = 7.2$  Hz, 2H), 4.12 (q,  $J = 7.2$  Hz, 2H), 1.60 (t,  $J = 7.0$  Hz, 3H), 1.31 (t,  $J = 7.0$  Hz, 3H) ppm;  $^{13}C$  NMR (100 MHz,  $DMSO-d_6$ )  $\delta$  168.44, 165.74, 163.47, 142.87, 130.55, 129.84, 126.74, 126.45, 125.28, 121.88, 111.35, 99.51, 65.16, 59.78, 14.18, 14.01 ppm; ESI-HRMS: calcd. for  $C_{16}H_{16}ClNO_4+H$  322.0846, found 322.0847.

**Ethyl-(E)-4-((E)-5-bromo-2-oxoindolin-3-ylidene)-3-ethoxybut-2-enoate (If):** yield 301 mg (93%, orange solid); mp 217-218 °C;  $^1H$  NMR (400 MHz,  $CDCl_3$ )  $\delta$  8.50 (s, 1H), 8.38 (s, 1H), 8.14 (d,  $J = 2.0$  Hz, 1H), 7.35 (dd,  $J = 8.0, 2.0$  Hz, 1H), 6.77 (d,  $J = 8.0$  Hz, 1H), 5.49 (s, 1H), 4.22 (q,  $J = 7.2$  Hz, 2H), 4.12 (q,  $J = 7.2$  Hz, 2H), 1.61 (t,  $J = 7.0$  Hz, 3H), 1.31 (t,  $J = 7.0$  Hz, 3H) ppm;  $^{13}C$  NMR (100 MHz,  $DMSO-d_6$ )  $\delta$  168.33, 165.75, 163.48, 143.25, 133.35, 129.72, 129.48, 126.40, 122.34, 112.94, 111.88, 99.57, 65.20, 59.80, 14.20, 14.11 ppm; ESI-HRMS: calcd. for  $C_{16}H_{16}BrNO_4+H$  366.0341, found 366.0340.

**Ethyl-(E)-3-ethoxy-4-((E)-5-iodo-2-oxoindolin-3-ylidene)but-2-enoate (Ig):** yield 214 mg (71%, brick red solid); mp 232-233 °C;  $^1H$  NMR (400 MHz,  $DMSO-d_6$ )  $\delta$  10.77 (s, 1H), 8.26 (d,  $J = 1.6$  Hz, 1H), 8.16 (s, 1H), 7.59 (dd,  $J = 8.0, 1.8$  Hz, 1H), 6.70 (d,  $J = 8.0$  Hz, 1H), 5.60 (s, 1H), 4.10-4.17 (m, 4H), 1.51 (t,  $J = 7.0$  Hz, 3H), 1.23 (t,  $J = 7.2$  Hz, 3H) ppm;  $^{13}C$  NMR (100 MHz,  $DMSO-d_6$ )  $\delta$  168.17, 165.77, 163.58, 143.68, 139.07, 134.98, 129.55, 126.17, 122.76, 112.38, 99.48, 83.98, 65.23, 59.80, 14.33, 14.22 ppm; ESI-HRMS: calcd. for  $C_{16}H_{16}INO_4+H$  414.0202, found 414.0197.

**Ethyl-(E)-3-ethoxy-4-((E)-2-oxo-5-(trifluoromethoxy)indolin-3-ylidene)but-2-enoate (Ih):** yield 64 mg (20%, orange solid); mp 156-157 °C;  $^1H$  NMR (400 MHz,  $DMSO-d_6$ )  $\delta$  10.87 (s, 1H), 8.21 (s, 1H), 7.84 (d,  $J = 2.4$  Hz, 1H), 7.31 (ddd,  $J = 8.4, 2.4, 1.2$  Hz, 1H), 6.93 (d,  $J = 8.4$  Hz, 1H), 5.63 (s, 1H), 4.11-4.18 (m, 4H), 1.42 (t,  $J =$

7.0 Hz, 3H), 1.23 (t,  $J = 7.0$  Hz, 3H) ppm;  $^{13}\text{C}$  NMR (100 MHz,  $\text{DMSO-}d_6$ )  $\delta$  168.74, 165.82, 163.42, 143.28, 142.66, 129.86, 126.96, 124.55, 121.58, 121.39, 120.46, 110.94, 99.82, 65.25, 59.89, 14.22, 13.77 ppm; ESI-HRMS: calcd. for  $\text{C}_{17}\text{H}_{16}\text{F}_3\text{NO}_5+\text{H}$  372.1059, found 372.1053.

**Ethyl- (E)-3-ethoxy-4-((E)-5-nitro-2-oxoindolin-3-ylidene)but-2-enoate (Ii):** yield 200 mg (58%, yellow solid); mp 263-264 °C;  $^1\text{H}$  NMR (400 MHz,  $\text{DMSO-}d_6$ )  $\delta$  11.39 (s, 1H), 8.78 (d,  $J = 2.4$  Hz, 1H), 8.33 (s, 1H), 8.22 (dd,  $J = 8.8, 2.4$  Hz, 1H), 7.03 (d,  $J = 8.8$  Hz, 1H), 5.68 (s, 1H), 4.12-4.20 (m, 4H), 1.55 (t,  $J = 7.0$  Hz, 3H), 1.24 (t,  $J = 7.2$  Hz, 3H) ppm;  $^{13}\text{C}$  NMR (100 MHz,  $\text{DMSO-}d_6$ )  $\delta$  168.97, 165.69, 163.04, 149.70, 141.87, 128.76, 127.77, 127.45, 122.48, 120.57, 110.13, 100.57, 65.44, 59.90, 14.15, 13.90 ppm; ESI-HRMS: calcd. for  $\text{C}_{16}\text{H}_{16}\text{N}_2\text{O}_6+\text{H}$  333.1087, found 333.1097.

**Ethyl (E)-3-ethoxy-4-((E)-6-fluoro-2-oxoindolin-3-ylidene)but-2-enoate (Ij):** yield 203 mg (55%, yellow solid); mp 174-175 °C;  $^1\text{H}$  NMR (400 MHz,  $\text{CDCl}_3$ )  $\delta$  8.70 (s, 1H), 8.26 (s, 1H), 7.86 (dd,  $J = 9.2, 5.8$  Hz, 1H), 6.62-6.67 (m, 2H), 5.45 (s, 1H), 4.22 (q,  $J = 7.2$  Hz, 2H), 4.10 (q,  $J = 7.0$  Hz, 2H), 1.52 (t,  $J = 7.0$  Hz, 3H), 1.31 (t,  $J = 7.2$  Hz, 3H) ppm;  $^{13}\text{C}$  NMR (100 MHz,  $\text{DMSO-}d_6$ )  $\delta$  169.10, 165.94, 163.96, 146.09 (d,  $J = 12.6$  Hz), 129.76 (d,  $J = 1.9$  Hz), 128.99 (d,  $J = 10.4$  Hz), 124.88 (d,  $J = 3.0$  Hz), 116.94 (d,  $J = 2.8$  Hz), 107.86 (d,  $J = 22.3$  Hz), 98.48, 98.13 (d,  $J = 26.7$  Hz), 65.00, 59.74, 14.26, 13.99 ppm; ESI-HRMS: calcd. for  $\text{C}_{16}\text{H}_{16}\text{FNO}_4+\text{H}$  306.1142, found 306.1147.

**Ethyl- (E)-4-((E)-6-chloro-2-oxoindolin-3-ylidene)-3-ethoxybut-2-enoate (Ik):** yield 63 mg (18%, orange solid); mp 185-186 °C;  $^1\text{H}$  NMR (400 MHz,  $\text{CDCl}_3$ )  $\delta$  8.82 (s, 1H), 8.31 (s, 1H), 7.81 (d,  $J = 8.4$  Hz, 1H), 6.93 (dd,  $J = 8.0, 1.6$  Hz, 1H), 6.91 (d,  $J = 1.6$  Hz, 1H), 5.47 (s, 1H), 4.22 (q,  $J = 7.2$  Hz, 2H), 4.10 (q,  $J = 7.2$  Hz, 2H), 1.52 (t,  $J = 6.8$  Hz, 3H), 1.31 (t,  $J = 7.0$  Hz, 3H) ppm;  $^{13}\text{C}$  NMR (100 MHz,  $\text{DMSO-}d_6$ )  $\delta$  168.68, 165.83, 163.74, 145.37, 135.29, 129.68, 128.30, 125.91, 121.11, 119.30, 110.01, 98.81, 64.99, 59.72, 14.20, 13.92 ppm; ESI-HRMS: calcd. for  $\text{C}_{16}\text{H}_{16}\text{ClNO}_4+\text{H}$  322.0846, found 322.0841.

**Ethyl-(E)-4-((E)-6-bromo-2-oxoindolin-3-ylidene)-3-ethoxybut-2-enoate (Il):** yield 230 mg (71%, orange solid); mp 178-179 °C;  $^1\text{H}$  NMR (400 MHz,  $\text{CDCl}_3$ )  $\delta$  8.37

(s, 1H), 8.32 (s, 1H), 7.74 (d,  $J = 8.4$  Hz, 1H), 7.10 (dd,  $J = 8.4, 2.0$  Hz, 1H), 7.05 (d,  $J = 1.6$  Hz, 1H), 5.47 (s, 1H), 4.22 (q,  $J = 7.2$  Hz, 2H), 4.10 (q,  $J = 7.0$  Hz, 2H), 1.52 (t,  $J = 7.0$  Hz, 3H), 1.31 (t,  $J = 7.2$  Hz, 3H) ppm;  $^{13}\text{C}$  NMR (100 MHz, DMSO- $d_6$ )  $\delta$  168.55, 165.82, 163.75, 145.41, 129.77, 128.49, 126.08, 124.00, 119.63, 112.81, 98.83, 64.99, 59.71, 14.19, 13.90 ppm; ESI-HRMS: calcd. for  $\text{C}_{16}\text{H}_{16}\text{NBrO}_4+\text{H}$  366.0341, found 366.0336.

**Ethyl- (E)-3-ethoxy-4-((E)-7-fluoro-2-oxoindolin-3-ylidene)but-2-enoate (1m):** yield 273 mg (74%, orange solid); mp 201-202 °C;  $^1\text{H}$  NMR (400 MHz, DMSO- $d_6$ )  $\delta$  11.17 (s, 1H), 8.09 (s, 1H), 7.67 (d,  $J = 7.6$  Hz, 1H), 7.21 (m, 1H), 6.98 (td,  $J = 8.0, 5.2$  Hz, 1H), 5.59 (s, 1H), 4.09-4.18 (m, 4H), 1.40 (t,  $J = 7.0$  Hz, 3H), 1.22 (t,  $J = 7.0$  Hz, 3H) ppm;  $^{13}\text{C}$  NMR (100 MHz, DMSO- $d_6$ )  $\delta$  168.51, 165.86, 163.70, 146.63 (d,  $J = 240.4$  Hz), 131.07 (d,  $J = 12.9$  Hz), 130.08 (d,  $J = 4.1$  Hz), 127.01, 123.27 (d,  $J = 4.5$  Hz), 122.96 (d,  $J = 3.2$  Hz), 121.83 (d,  $J = 6.0$  Hz), 117.72 (d,  $J = 17.2$  Hz), 98.81, 65.03, 59.75, 14.19, 13.91 ppm; ESI-HRMS: calcd. for  $\text{C}_{16}\text{H}_{16}\text{FNO}_4+\text{H}$  306.1142, found 306.1143.

**Ethyl-(E)-4-((E)-7-chloro-2-oxoindolin-3-ylidene)-3-ethoxybut-2-enoate (1n):** yield 248 mg (70%, orange solid); mp 140-141 °C;  $^1\text{H}$  NMR (400 MHz, DMSO- $d_6$ )  $\delta$  11.09 (s, 1H), 8.10 (s, 1H), 7.80 (d,  $J = 7.6$  Hz, 1H), 7.36 (d,  $J = 8.0$  Hz, 1H), 7.00 (t,  $J = 8.0$  Hz, 1H), 5.59 (s, 1H), 4.11-4.17 (m, 4H), 1.40 (t,  $J = 7.0$  Hz, 3H), 1.22 (t,  $J = 7.0$  Hz, 3H) ppm;  $^{13}\text{C}$  NMR (100 MHz, DMSO- $d_6$ )  $\delta$  168.53, 165.78, 163.56, 141.39, 130.61, 130.22, 127.14, 125.35, 122.35, 122.20, 114.34, 98.89, 64.98, 59.69, 14.15, 13.85 ppm; ESI-HRMS: calcd. for  $\text{C}_{16}\text{H}_{16}\text{ClNO}_4+\text{H}$  322.0846, found 322.0846.

**Ethyl-(E)-4-((E)-7-bromo-2-oxoindolin-3-ylidene)-3-ethoxybut-2-enoate (1o):** yield 174 mg (54%, orange solid); mp 179-180 °C;  $^1\text{H}$  NMR (400 MHz, DMSO- $d_6$ )  $\delta$  10.94 (s, 1H), 8.08 (s, 1H), 7.83 (dd,  $J = 8.0, 1.2$  Hz, 1H), 7.48 (dd,  $J = 8.0, 1.2$  Hz, 1H), 6.93 (t,  $J = 8.0$  Hz, 1H), 5.59 (s, 1H), 4.10-4.18 (m, 4H), 1.40 (t,  $J = 7.0$  Hz, 3H), 1.22 (t,  $J = 7.0$  Hz, 3H) ppm;  $^{13}\text{C}$  NMR (100 MHz, DMSO- $d_6$ )  $\delta$  168.51, 165.84, 163.61, 143.05, 133.62, 130.45, 127.22, 125.87, 122.82, 122.24, 102.56, 98.93, 65.05, 59.76, 14.21, 13.91 ppm; ESI-HRMS: calcd. for  $\text{C}_{16}\text{H}_{16}\text{BrNO}_4+\text{H}$  366.0341, found 366.0343.



**Ethyl-(E)-4-((E)-5,6-difluoro-2-oxoindolin-3-ylidene)-3-ethoxybut-2-enoate (Ip):** yield 250 mg (71%, orange solid); mp 180-181 °C; <sup>1</sup>H NMR (400 MHz, CDCl<sub>3</sub>) δ 8.51 (s, 1H), 8.36 (s, 1H), 7.84 (dd, *J* = 11.2, 8.0 Hz, 1H), 6.73 (dd, *J* = 9.8, 6.6 Hz, 1H), 5.49 (s, 1H), 4.22 (q, *J* = 7.2 Hz, 2H), 4.12 (q, *J* = 7.0 Hz, 2H), 1.57 (t, *J* = 7.2 Hz, 3H), 1.31 (t, *J* = 7.2 Hz, 3H) ppm; <sup>13</sup>C NMR (100 MHz, DMSO-*d*<sub>6</sub>) δ 168.72, 165.69, 163.35, 151.01 (dd, *J* = 248.4, 14.1 Hz), 144.62 (dd, *J* = 235, 13.2 Hz), 141.28 (dd, *J* = 10, 1.9 Hz), 129.29 (t, *J* = 2.7 Hz), 125.68 (d, *J* = 3.5 Hz), 116.38 (dd, *J* = 7.8, 3.8 Hz), 116.07 (d, *J* = 21.5 Hz), 99.59, 99.42 (d, *J* = 5.5 Hz), 65.08, 59.73, 14.13, 13.87 ppm; ESI-HRMS: calcd. for C<sub>16</sub>H<sub>15</sub>F<sub>2</sub>NO<sub>4</sub>+H 324.1047, found 324.1051.

**Ethyl-(E)-3-ethoxy-4-((E)-1-methyl-2-oxoindolin-3-ylidene)but-2-enoate (Iq):** yield 344 mg (92%, orange solid); mp 82-83 °C; <sup>1</sup>H NMR (400 MHz, CDCl<sub>3</sub>) δ 8.20 (s, 1H), 7.83 (dd, *J* = 7.6, 1.2 Hz, 1H), 7.29 (td, *J* = 7.6, 1.2 Hz, 1H), 6.97 (td, *J* = 7.6, 1.2 Hz, 1H), 6.78 (d, *J* = 7.6 Hz, 1H), 5.43 (s, 1H), 4.20 (q, *J* = 7.2 Hz, 2H), 4.09 (q, *J* = 7.2 Hz, 2H), 3.24 (s, 3H), 1.51 (t, *J* = 7.0 Hz, 3H), 1.30 (t, *J* = 7.0 Hz, 3H) ppm; <sup>13</sup>C NMR (100 MHz, CDCl<sub>3</sub>) δ 168.21, 166.21, 164.24, 145.29, 130.53, 130.24, 127.03, 126.53, 121.68, 120.69, 107.95, 98.56, 64.64, 60.20, 26.14, 14.31, 14.13 ppm; ESI-HRMS: calcd. for C<sub>17</sub>H<sub>19</sub>NO<sub>4</sub>+H 302.1392, found 302.1398.

**Ethyl-(E)-4-((E)-5-chloro-1-methyl-2-oxoindolin-3-ylidene)-3-ethoxybut-2-enoate (Ir):** yield 309 mg (90%, orange solid); mp 141-142 °C; <sup>1</sup>H NMR (400 MHz, CDCl<sub>3</sub>) δ 8.33 (s, 1H), 7.94 (d, *J* = 2.4 Hz, 1H), 7.26 (dd, *J* = 8.4, 2.4 Hz, 1H), 6.70 (d, *J* = 8.4 Hz, 1H), 5.47 (s, 1H), 4.22 (q, *J* = 7.2 Hz, 2H), 4.11 (q, *J* = 7.2 Hz, 2H), 3.23 (s, 3H), 1.58 (t, *J* = 7.0 Hz, 3H), 1.31 (t, *J* = 7.0 Hz, 3H) ppm; <sup>13</sup>C NMR (100 MHz, CDCl<sub>3</sub>) δ 167.93, 166.06, 163.64, 143.73, 129.98, 129.25, 128.09, 127.14, 127.11, 121.96, 108.73, 99.68, 64.95, 60.35, 26.29, 14.31, 14.19 ppm; ESI-HRMS: calcd. for C<sub>17</sub>H<sub>18</sub>ClNO<sub>4</sub>+H 336.1003, found 336.1003.

**Ethyl-(E)-4-((E)-5-bromo-1-methyl-2-oxoindolin-3-ylidene)-3-ethoxybut-2-enoate (Is):** yield 310 mg (98%, orange solid); mp 131-132 °C; <sup>1</sup>H NMR (400 MHz, CDCl<sub>3</sub>) δ 8.33 (s, 1H), 8.10 (d, *J* = 2.0 Hz, 1H), 7.40 (dd, *J* = 8.4, 2.0 Hz, 1H), 6.66 (d, *J* = 8.4 Hz, 1H), 5.47 (s, 1H), 4.22 (q, *J* = 7.2 Hz, 2H), 4.10 (q, *J* = 7.0 Hz, 2H), 3.22 (s, 3H), 1.59 (t, *J* = 7.0 Hz, 3H), 1.31 (t, *J* = 7.2 Hz, 3H) ppm; <sup>13</sup>C NMR (100 MHz, CDCl<sub>3</sub>) δ

167.82, 166.05, 163.62, 144.17, 132.82, 129.85, 129.09, 128.08, 122.38, 114.43, 109.26, 99.75, 64.98, 60.35, 26.26, 14.32, 14.25 ppm; ESI-HRMS: calcd. for  $C_{17}H_{18}BrNO_4+H$  380.0497, found 380.0499.

**Ethyl- (E)-4-((E)-1-benzyl-2-oxoindolin-3-ylidene)-3-ethoxybut-2-enoate (It):** yield 270 mg (85%, orange solid); mp 121-122 °C;  $^1H$  NMR (400 MHz,  $CDCl_3$ )  $\delta$  8.29 (s, 1H), 7.84 (dd,  $J = 7.6, 1.2$  Hz, 1H), 7.26 – 7.31 (m, 5H), 7.17 (td,  $J = 7.6, 1.2$  Hz, 1H), 6.94 (td,  $J = 7.6, 1.2$  Hz, 1H), 6.68 (d,  $J = 8.0$  Hz, 1H), 5.45 (s, 1H), 4.95 (s, 2H), 4.22 (q,  $J = 7.2$  Hz, 2H), 4.11 (q,  $J = 7.0$  Hz, 2H), 1.52 (t,  $J = 7.0$  Hz, 3H), 1.31 (t,  $J = 7.0$  Hz, 3H) ppm;  $^{13}C$  NMR (100 MHz,  $CDCl_3$ )  $\delta$  168.33, 166.23, 164.23, 144.40, 135.86, 130.47, 130.08, 128.66, 127.49, 127.31, 126.65, 121.75, 120.83, 109.00, 98.68, 64.68, 60.24, 43.73, 14.33, 14.15 ppm; ESI-HRMS: calcd. for  $C_{23}H_{23}NO_4+H$  378.1705, found 378.1703.

**Ethyl-(E)-4-((E)-1-benzyl-5-chloro-2-oxoindolin-3-ylidene)-3-ethoxybut-2-enoate (Iu):** yield 218 mg (72%, orange solid); mp 110-111 °C;  $^1H$  NMR (400 MHz,  $CDCl_3$ )  $\delta$  8.42 (s, 1H), 7.96 (d,  $J = 2.0$  Hz, 1H), 7.26 – 7.35 (m, 5H), 7.13 (dd,  $J = 8.4, 2.4$  Hz, 1H), 6.59 (d,  $J = 8.4$  Hz, 1H), 5.49 (s, 1H), 4.94 (s, 2H), 4.23 (q,  $J = 7.2$  Hz, 2H), 4.12 (q,  $J = 7.2$  Hz, 2H), 1.58 (t,  $J = 7.0$  Hz, 3H), 1.33 (t,  $J = 7.2$  Hz, 3H) ppm;  $^{13}C$  NMR (100 MHz,  $CDCl_3$ )  $\delta$  168.04, 166.07, 163.63, 142.79, 135.45, 129.94, 129.10, 128.75, 128.43, 127.66, 127.25, 127.19, 122.13, 109.80, 99.78, 64.98, 60.37, 43.83, 14.32, 14.18 ppm; ESI-HRMS: calcd. for  $C_{23}H_{22}ClNO_4+H$  412.1316, found 412.1319.

**Ethyl-(E)-4-((E)-1-benzyl-5-bromo-2-oxoindolin-3-ylidene)-3-ethoxybut-2-enoate (Iv):** yield 248 mg (86%, orange solid); mp 129-130 °C;  $^1H$  NMR (400 MHz,  $CDCl_3$ )  $\delta$  8.42 (s, 1H), 8.12 (d,  $J = 2.0$  Hz, 1H), 7.26-7.34 (m, 6H), 6.54 (d,  $J = 8.4$  Hz, 1H), 5.49 (s, 1H), 4.94 (s, 2H), 4.23 (q,  $J = 7.2$  Hz, 2H), 4.12 (q,  $J = 7.0$  Hz, 2H), 1.59 (t,  $J = 7.0$  Hz, 3H), 1.32 (t,  $J = 7.0$  Hz, 3H) ppm;  $^{13}C$  NMR (100 MHz,  $CDCl_3$ )  $\delta$  167.93, 166.06, 163.61, 143.23, 135.41, 132.78, 129.95, 128.94, 128.76, 128.43, 127.67, 127.24, 122.56, 114.58, 110.31, 99.85, 65.00, 60.39, 43.82, 14.32, 14.24 ppm; ESI-HRMS: calcd. for  $C_{23}H_{22}BrNO_4+H$  456.0811, found 456.0811.

**tert-butyl-(E)-3-((E)-2,4-diethoxy-4-oxobut-2-en-1-ylidene)-2-oxoindoline-1-carboxylate (Iw):** yield 260 mg (83%, yellow solid); mp 112-113 °C;  $^1H$  NMR (400

MHz, CDCl<sub>3</sub>) δ 8.18 (s, 1H), 7.91 (d, *J* = 8.4 Hz, 1H), 7.88 (dd, *J* = 8.0, 1.2 Hz, 1H), 7.34 (td, *J* = 8.0, 1.2 Hz, 1H), 7.10 (td, *J* = 8.0, 1.2 Hz, 1H), 5.44 (s, 1H), 4.19 (q, *J* = 7.2 Hz, 2H), 4.09 (q, *J* = 7.2 Hz, 2H), 1.64 (s, 9H), 1.49 (t, *J* = 7.0 Hz, 3H), 1.28 (t, *J* = 7.2 Hz, 3H) ppm; <sup>13</sup>C NMR (100 MHz, CDCl<sub>3</sub>) δ 166.18, 166.11, 163.90, 149.24, 141.05, 130.71, 129.01, 128.10, 126.10, 123.63, 121.07, 114.92, 98.83, 84.16, 64.74, 60.25, 28.08, 14.32, 14.09 ppm; ESI-HRMS: calcd. for C<sub>21</sub>H<sub>25</sub>NO<sub>6</sub>+H 388.1760, found 388.1750.

**Ethyl-(E)-3-ethoxy-4-((E)-1-(ethoxymethyl)-2-oxoindolin-3-ylidene)but-2-enoate**

(**Ix**): yield 212 mg (63%, orange solid); mp 96-97 °C; <sup>1</sup>H NMR (400 MHz, CDCl<sub>3</sub>) δ 8.24 (s, 1H), 7.87 (dd, *J* = 7.6, 1.2 Hz, 1H), 7.30 (td, *J* = 7.6, 1.2 Hz, 1H), 6.99 – 7.05 (m, 2H), 5.45 (s, 1H), 5.22 (s, 2H), 4.20 (q, *J* = 7.2 Hz, 2H), 4.10 (q, *J* = 7.2 Hz, 2H), 3.55 (q, *J* = 7.2 Hz, 2H), 1.52 (t, *J* = 7.0 Hz, 3H), 1.30 (t, *J* = 7.0 Hz, 3H), 1.17 (t, *J* = 7.0 Hz, 3H) ppm; <sup>13</sup>C NMR (100 MHz, CDCl<sub>3</sub>) δ 168.59, 166.21, 164.16, 143.80, 130.70, 129.98, 127.52, 126.64, 122.22, 120.66, 109.58, 98.75, 69.82, 64.70, 64.12, 60.24, 14.86, 14.32, 14.15 ppm; ESI-HRMS: calcd. for C<sub>19</sub>H<sub>23</sub>NO<sub>5</sub>+H 346.1654, found 346.1658.

**Ethyl-(E)-3-((1S,6R)-4-(benzyloxy)-2,2'-dioxospiro[cyclohexane-1,3'-indolin]-3-en-6-yl)-3-ethoxyacrylate (3a-OBn)**: yield 33 mg (40%, white solid); mp 209-210 °C; IR (KBr) 3447, 2940, 2360, 2342, 2026, 1703, 1664, 1613 cm<sup>-1</sup>; <sup>1</sup>H NMR (400 MHz, CDCl<sub>3</sub>) δ 7.69 (s, 1H), 7.36-7.43 (m, 5H), 7.20 (td, *J* = 7.6, 1.2 Hz, 1H), 7.09 (d, *J* = 7.2 Hz, 1H), 6.98 (t, *J* = 7.6 Hz, 1H), 6.81 (d, *J* = 7.6 Hz, 1H), 5.63 (d, *J* = 1.2 Hz, 1H), 5.36 (dd, *J* = 12.0, 4.8 Hz, 1H), 5.00 (q, *J* = 11.6 Hz, 2H), 4.77 (s, 1H), 4.11 (q, *J* = 7.2 Hz, 2H), 3.64-3.72 (m, 2H), 3.40-3.46 (m, 1H), 2.61 (dd, *J* = 17.2, 4.8 Hz, 1H), 1.24 (t, *J* = 7.0 Hz, 3H), 1.13 (t, *J* = 6.8 Hz, 3H) ppm; <sup>13</sup>C NMR (100 MHz, CDCl<sub>3</sub>) δ 192.72, 177.83, 175.24, 170.73, 167.04, 141.52, 134.82, 128.88, 128.67, 128.57, 128.53, 127.96, 124.20, 122.42, 109.07, 101.56, 92.46, 71.02, 64.31, 61.28, 59.68, 40.65, 29.59, 14.27, 13.08 ppm; ESI-HRMS: calcd. for C<sub>27</sub>H<sub>27</sub>NO<sub>6</sub>+H 462.1917, found 462.1921.

#### 4. Copies of $^1\text{H}$ NMR and $^{13}\text{C}$ NMR

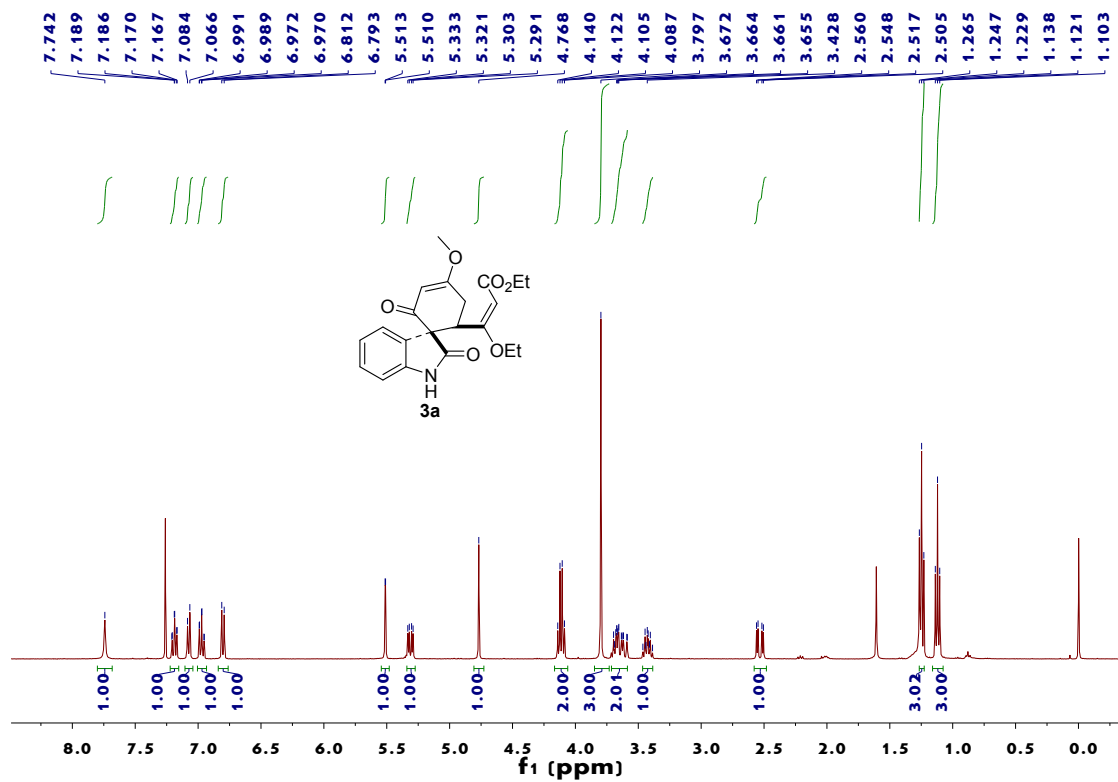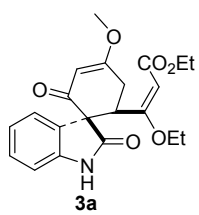

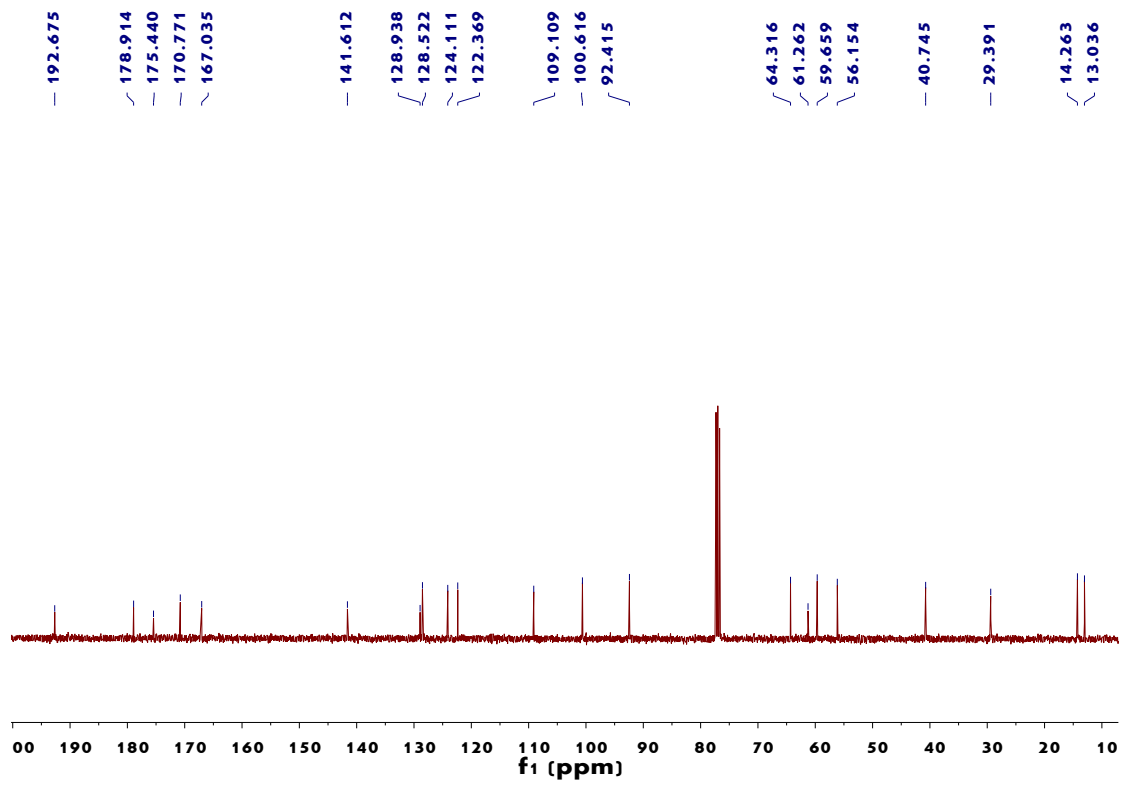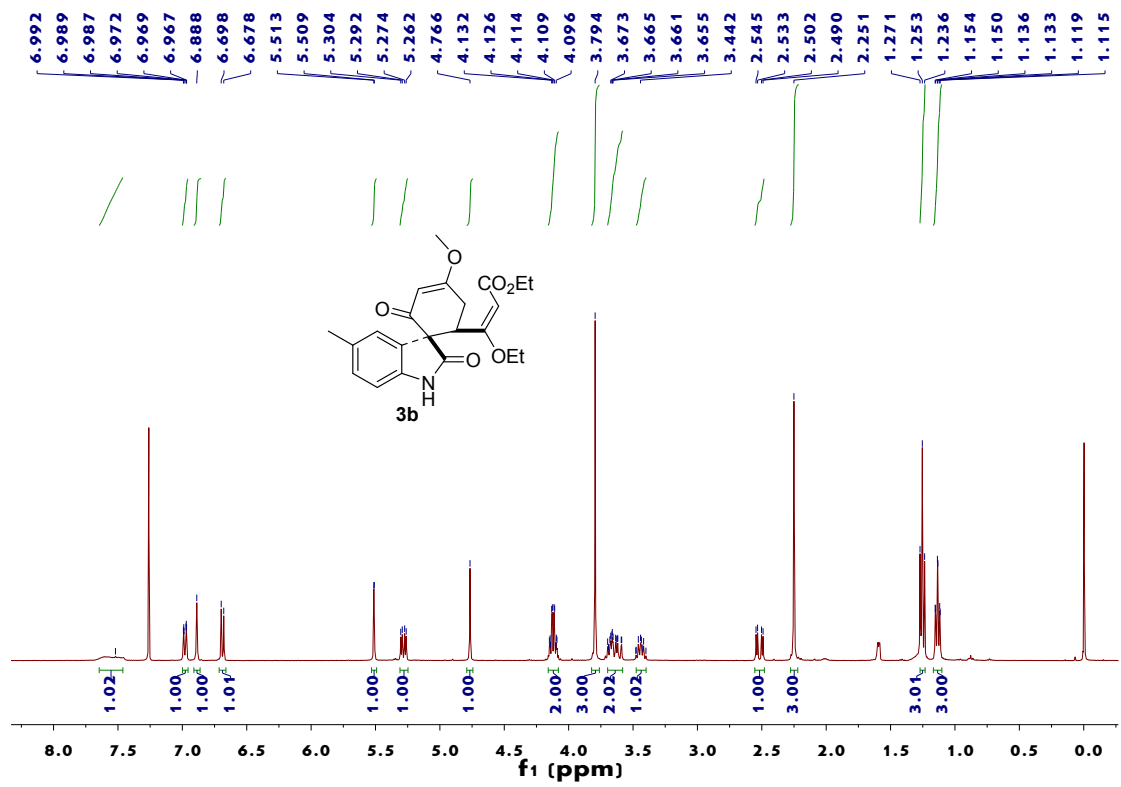

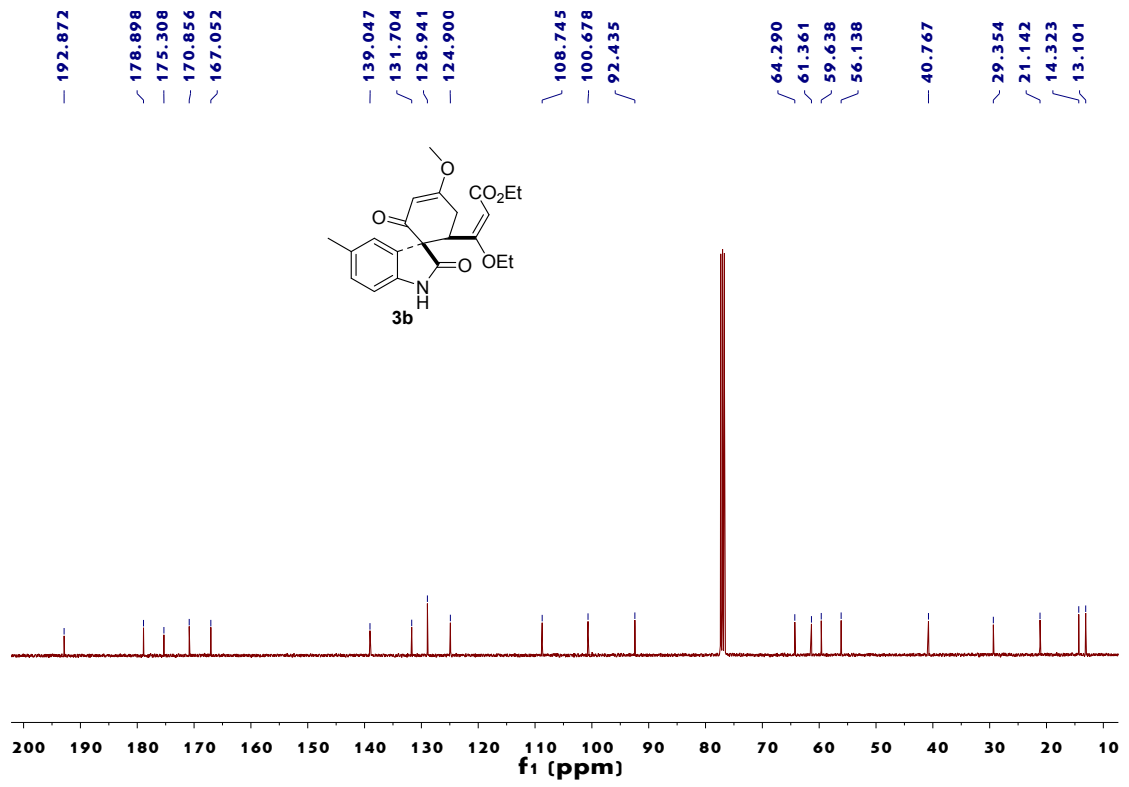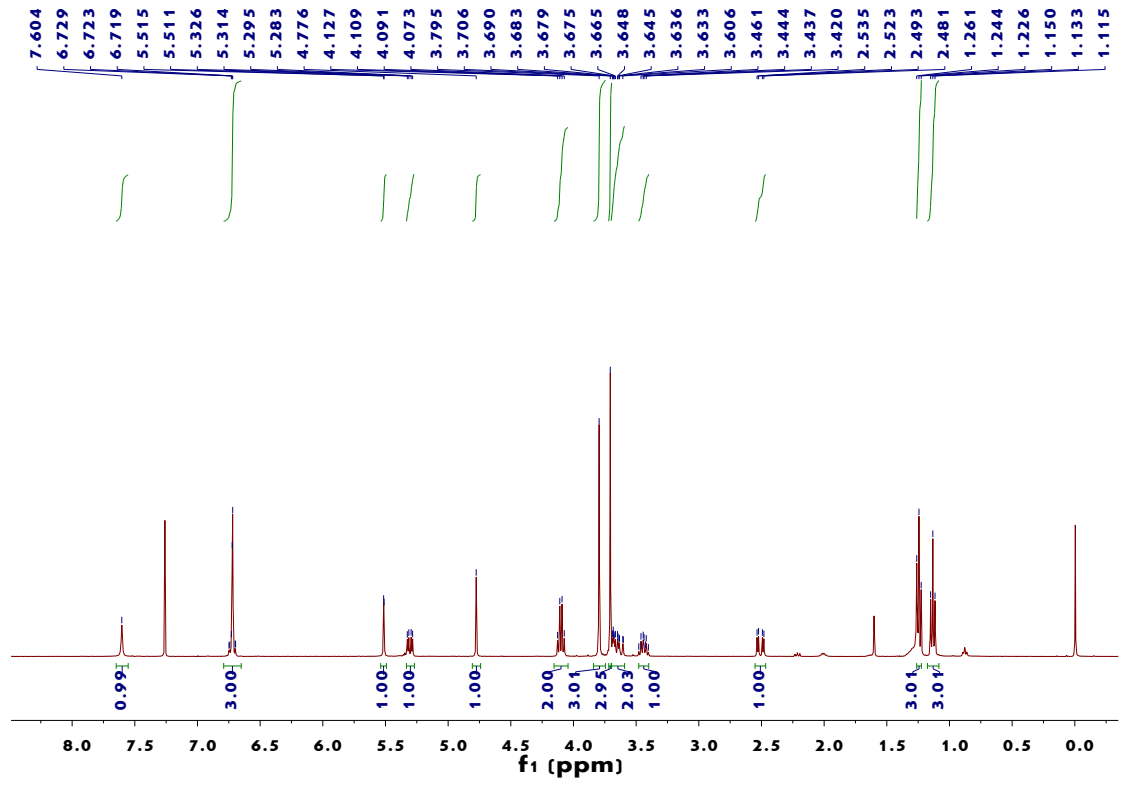

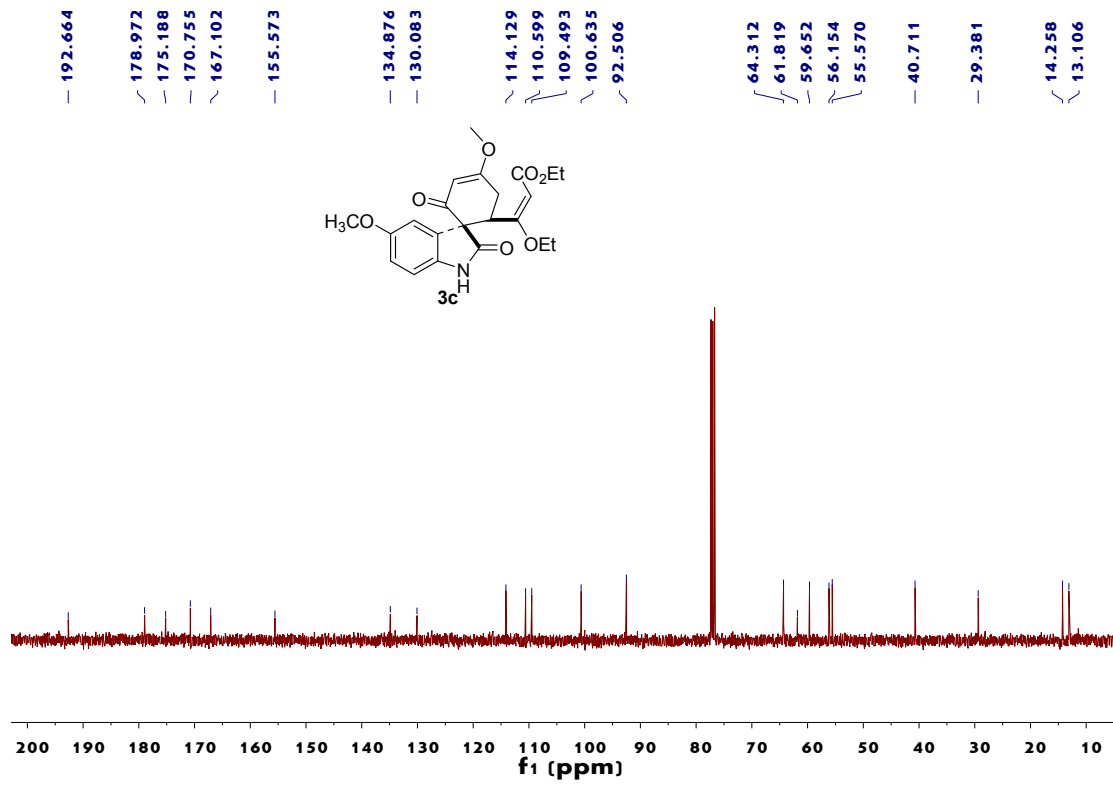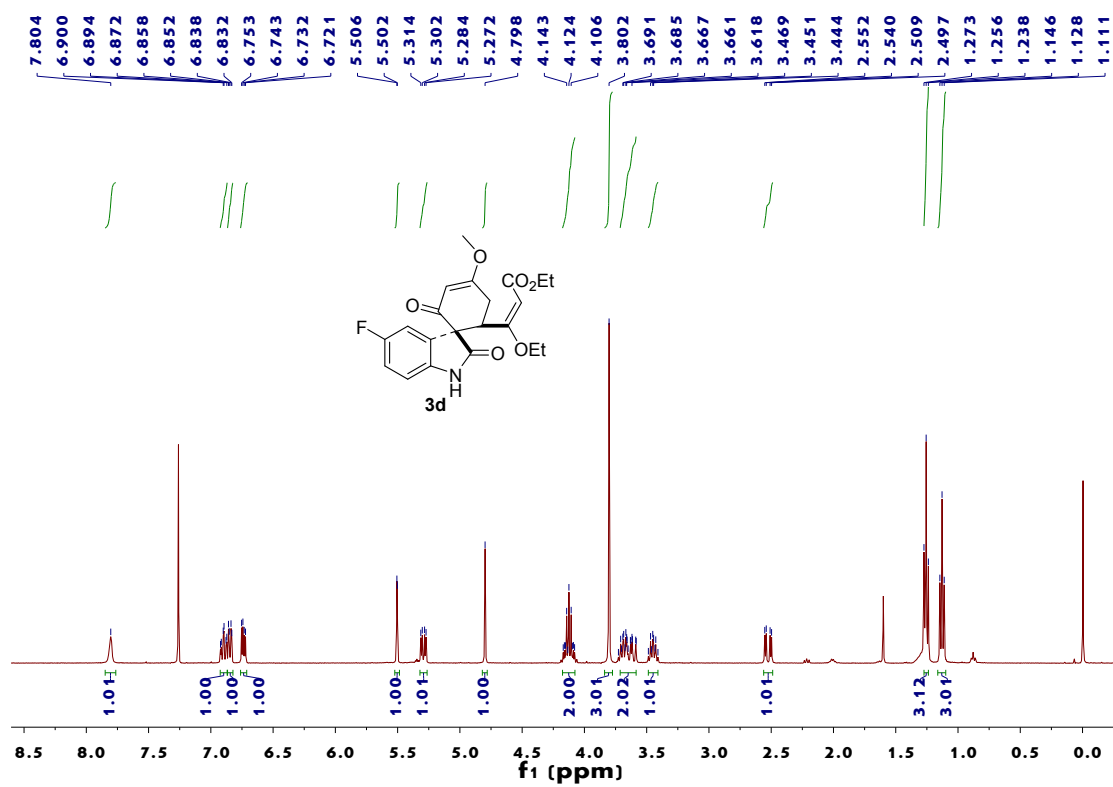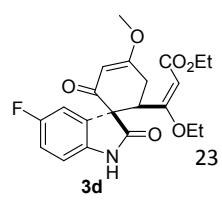

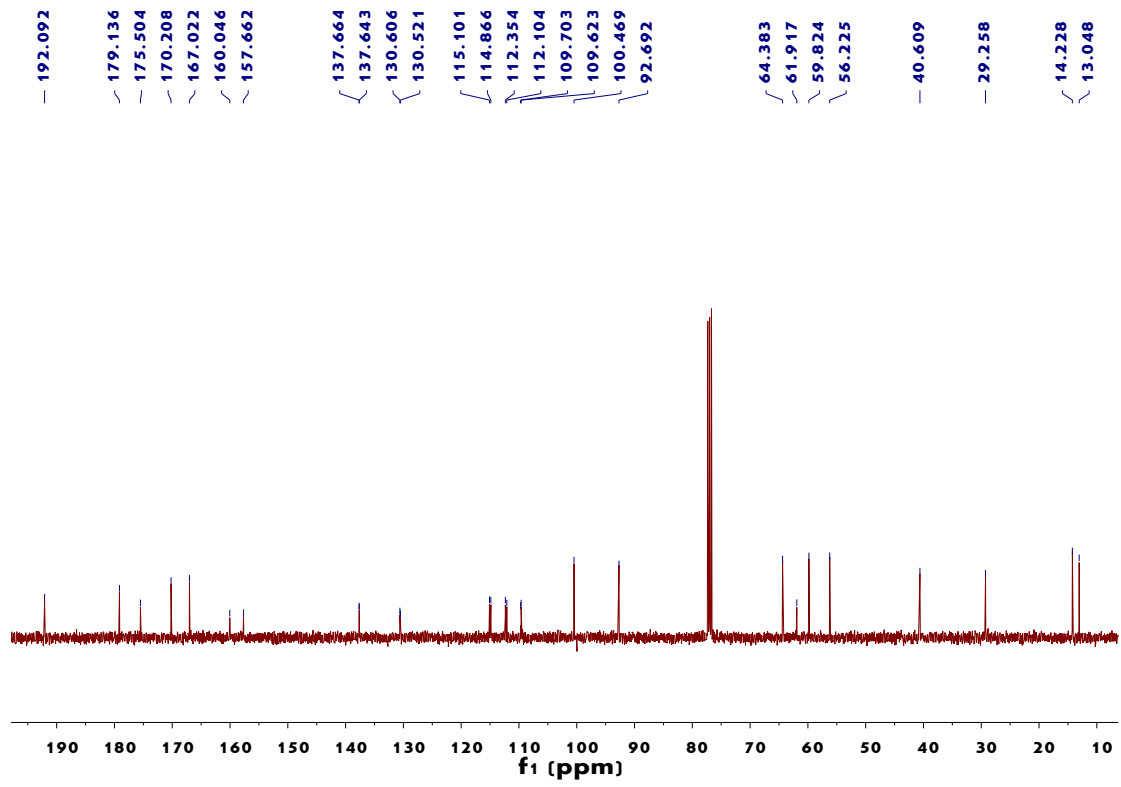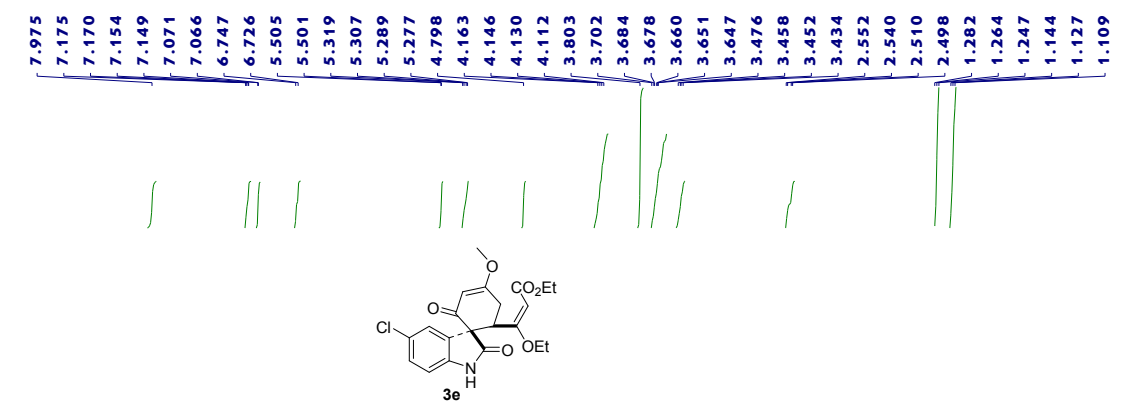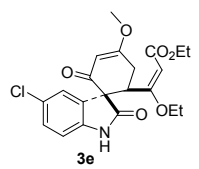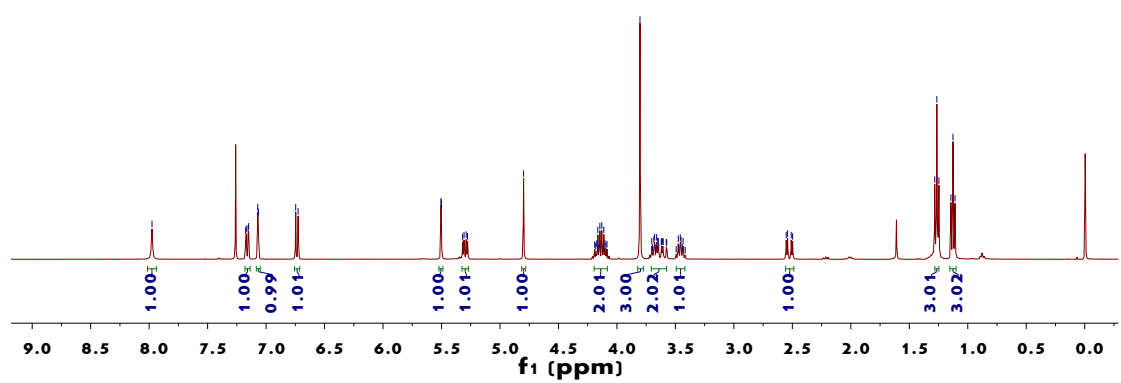



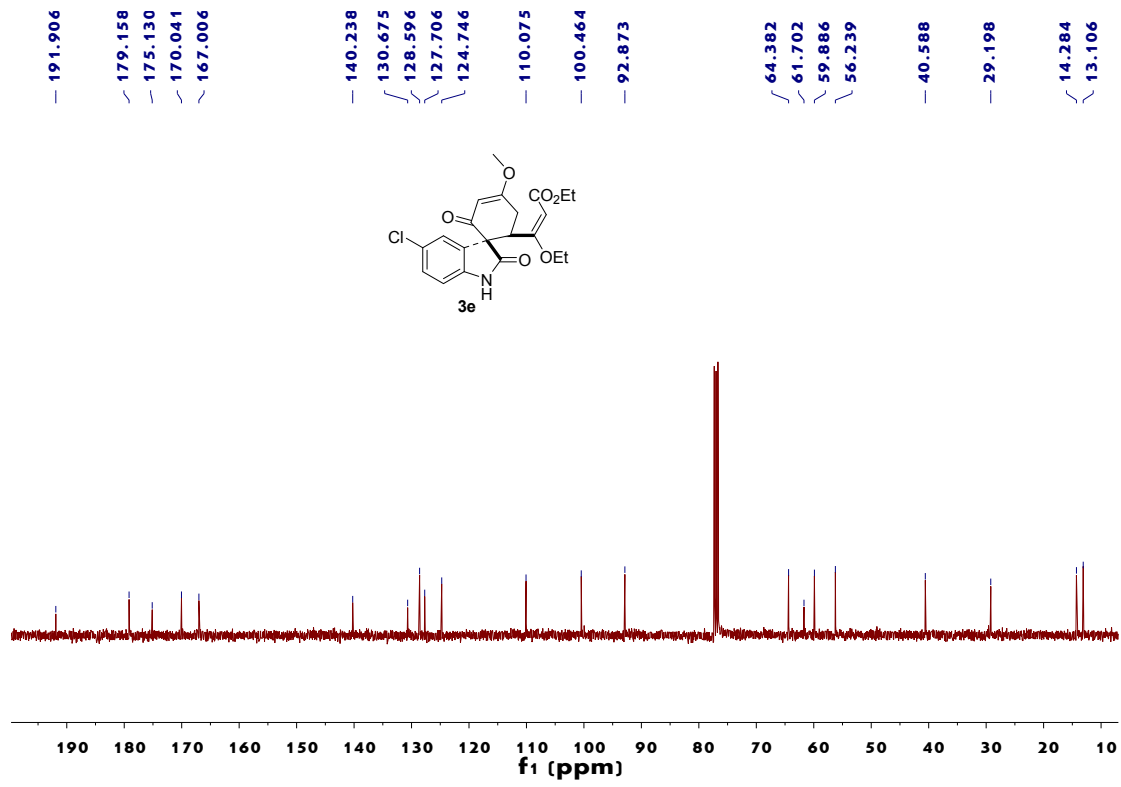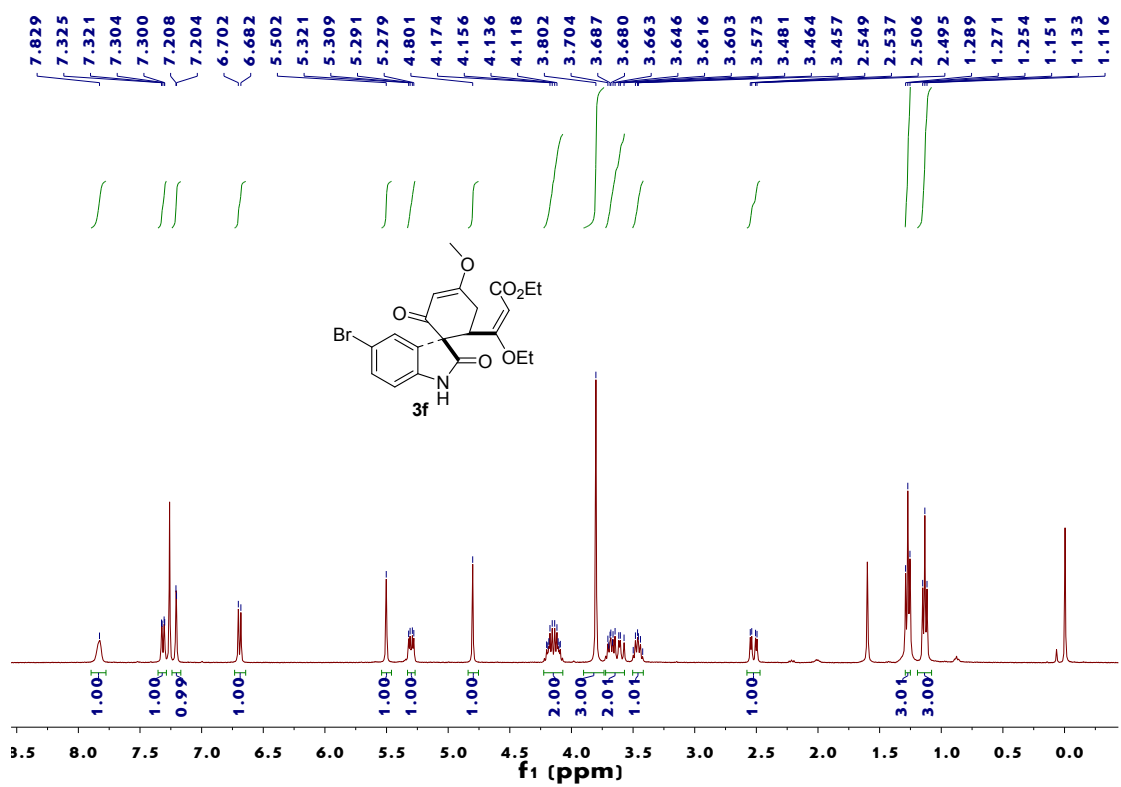

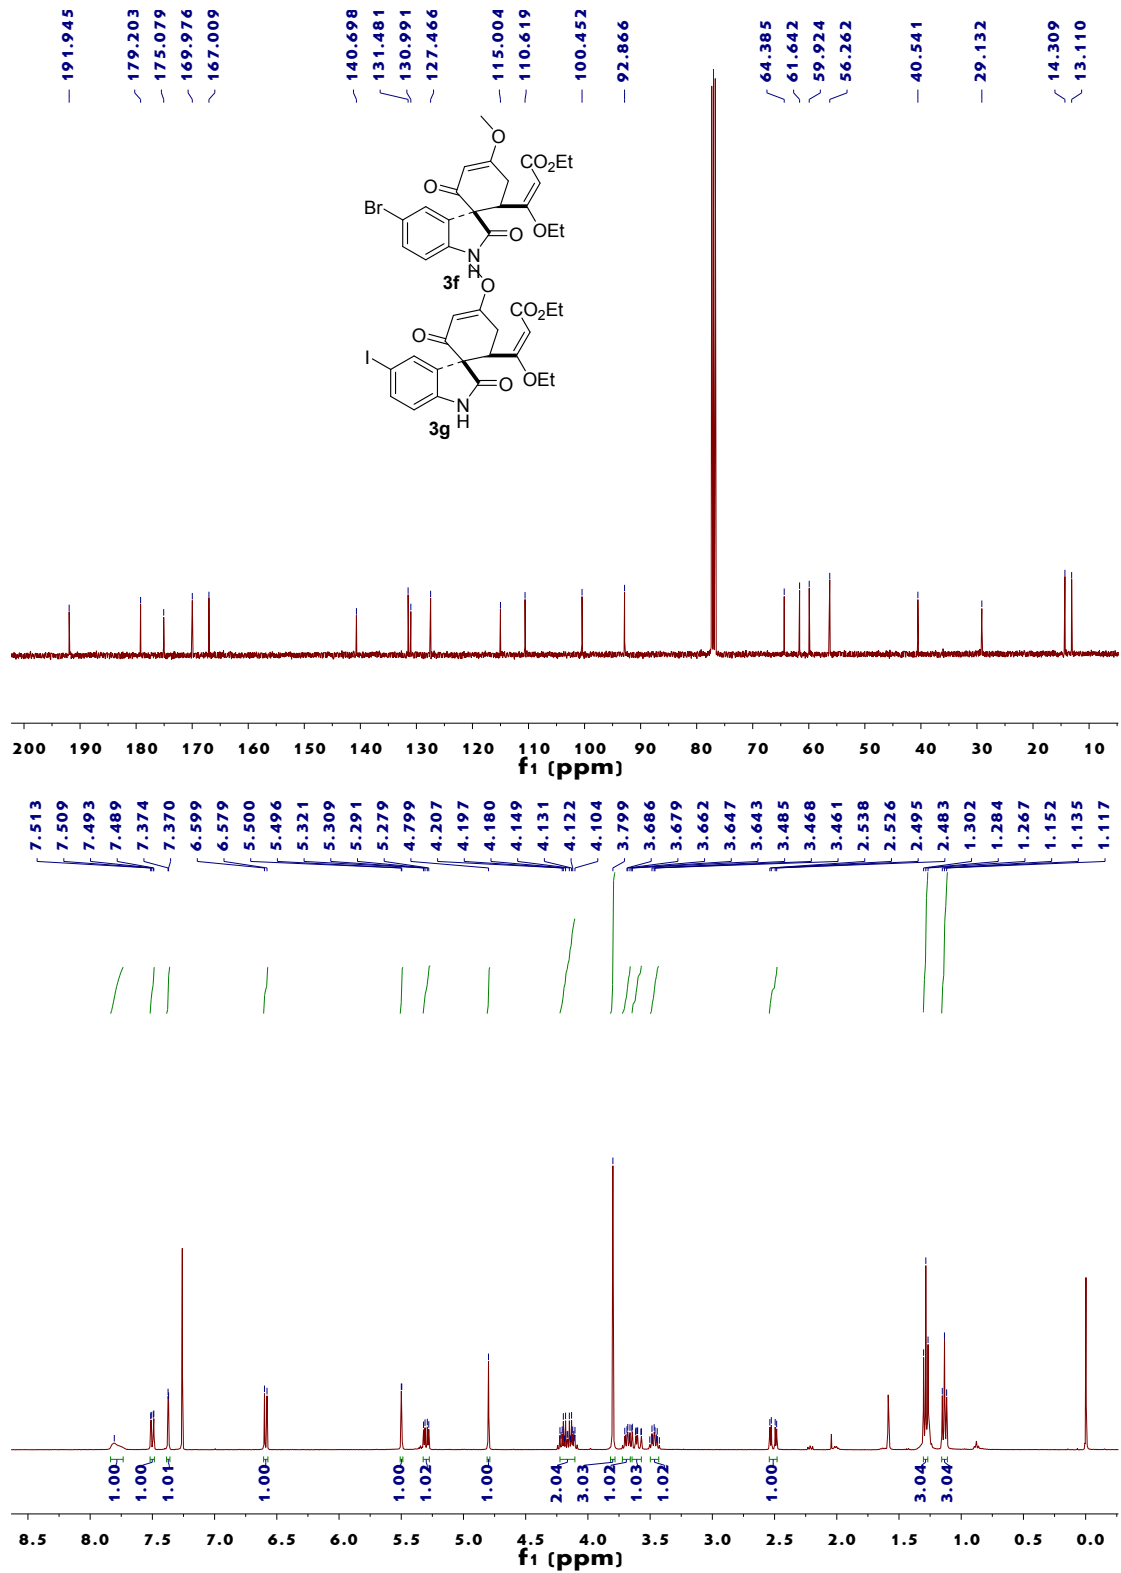

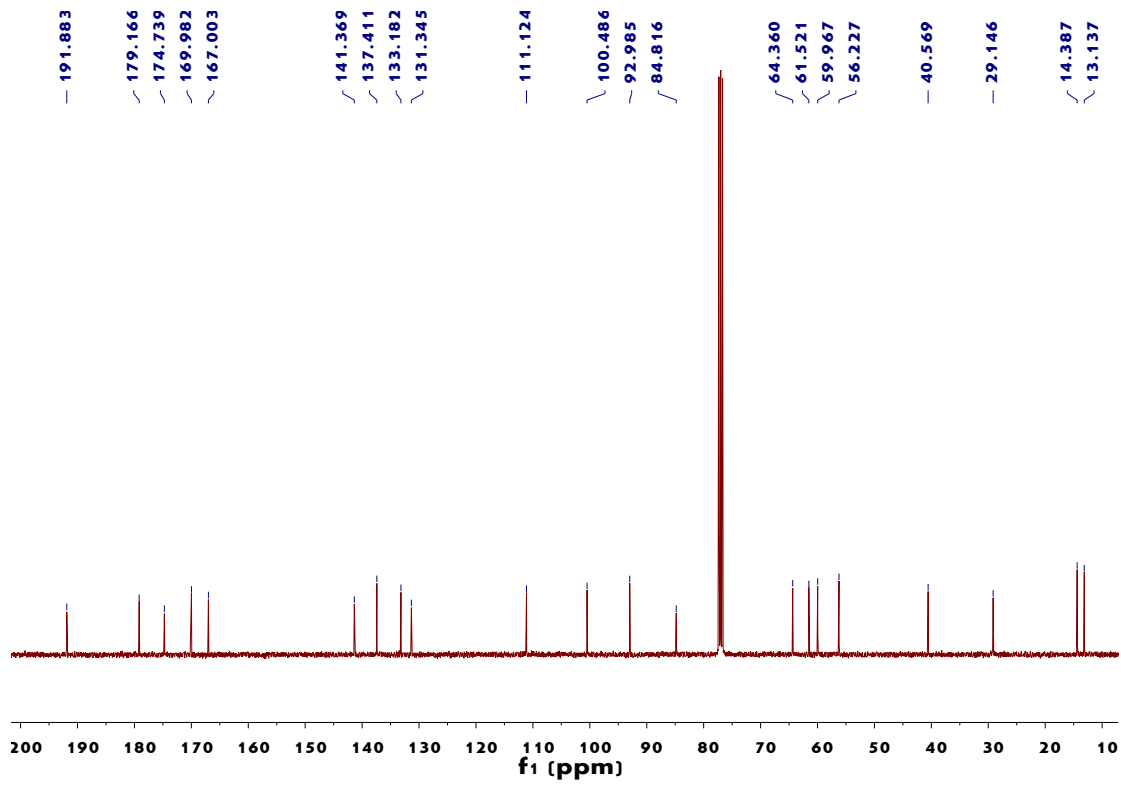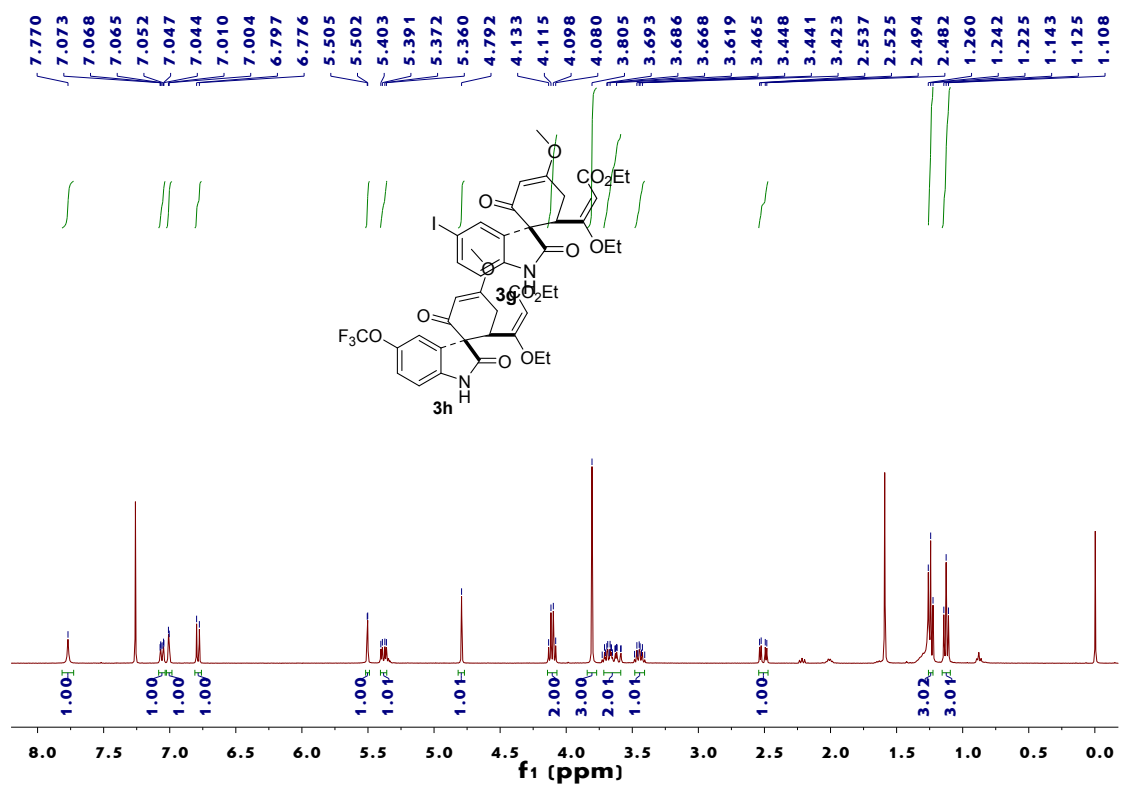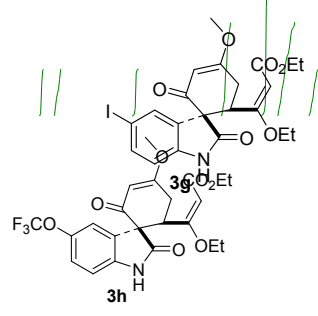

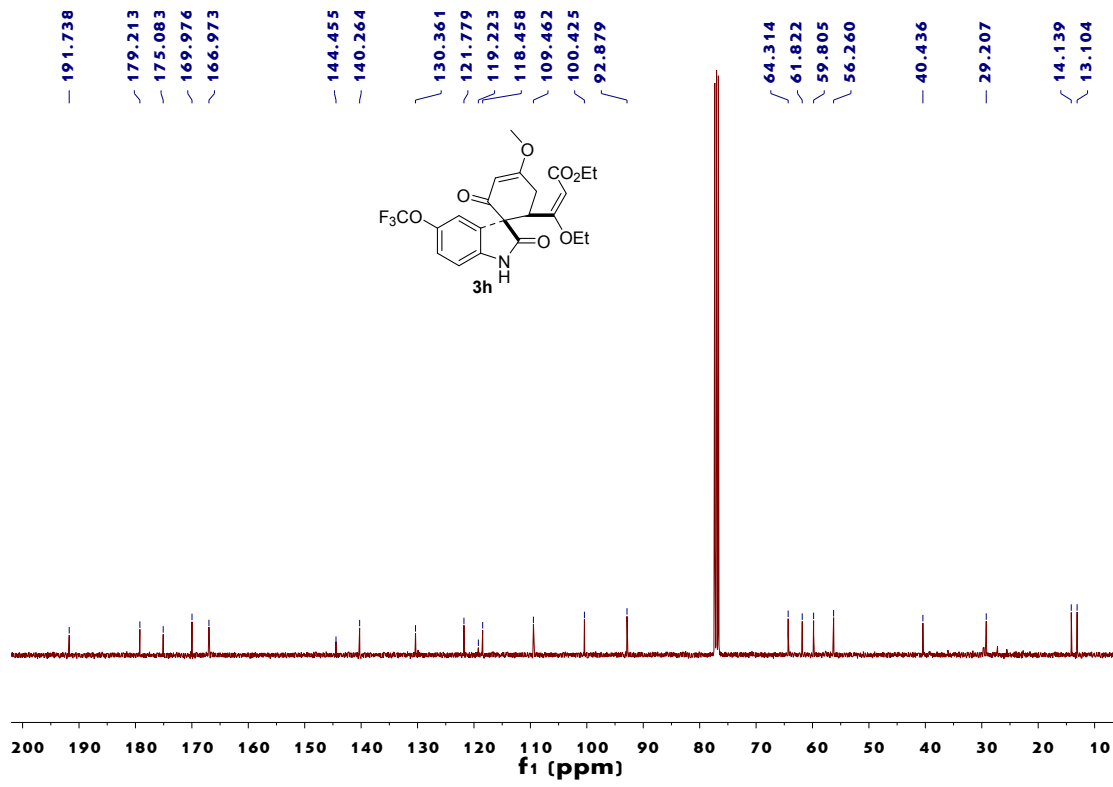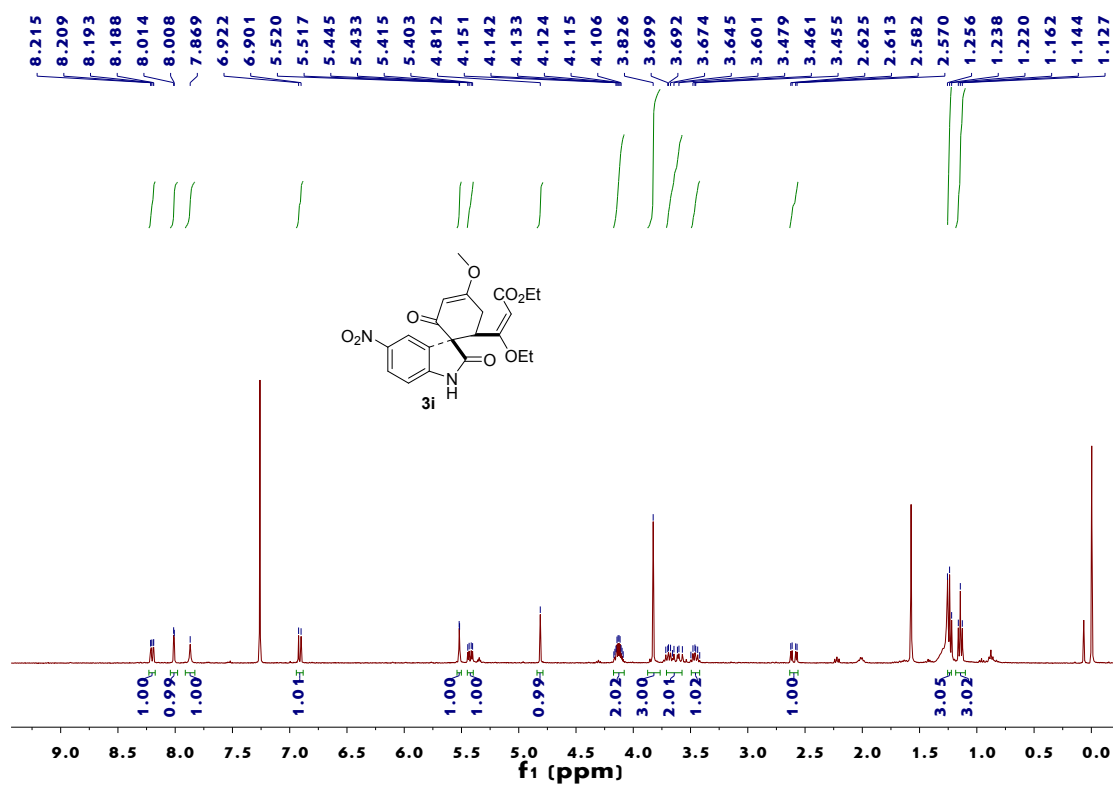

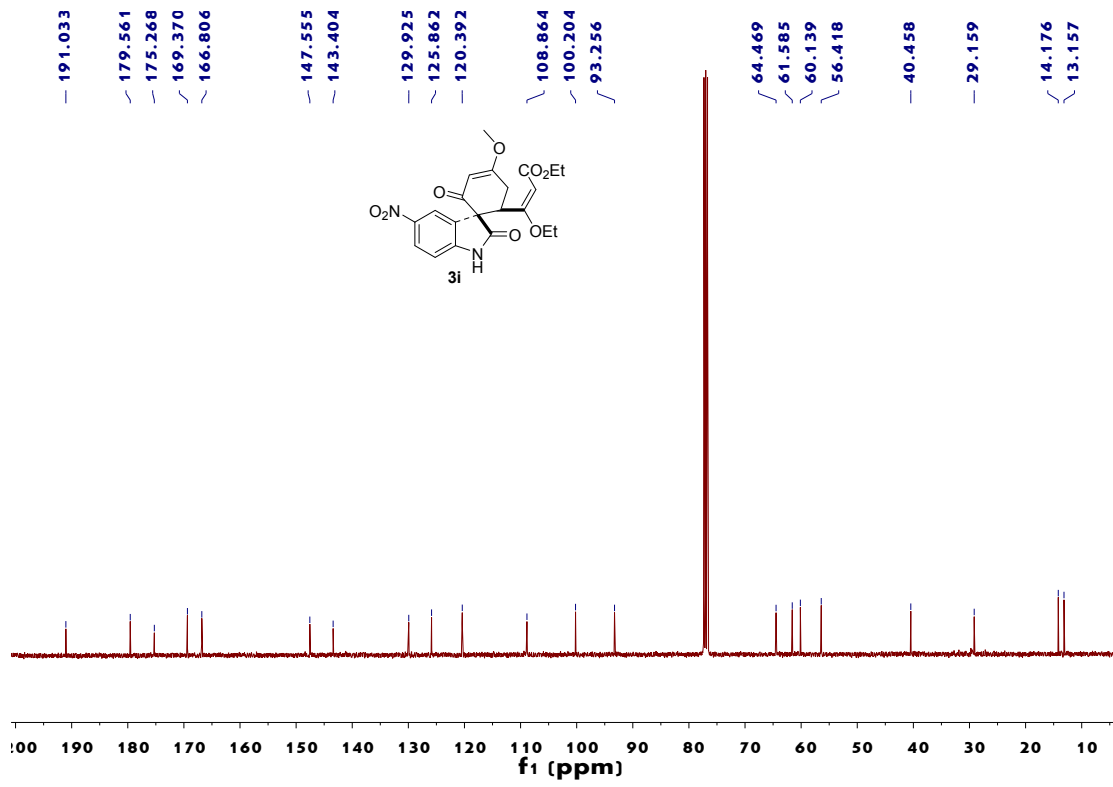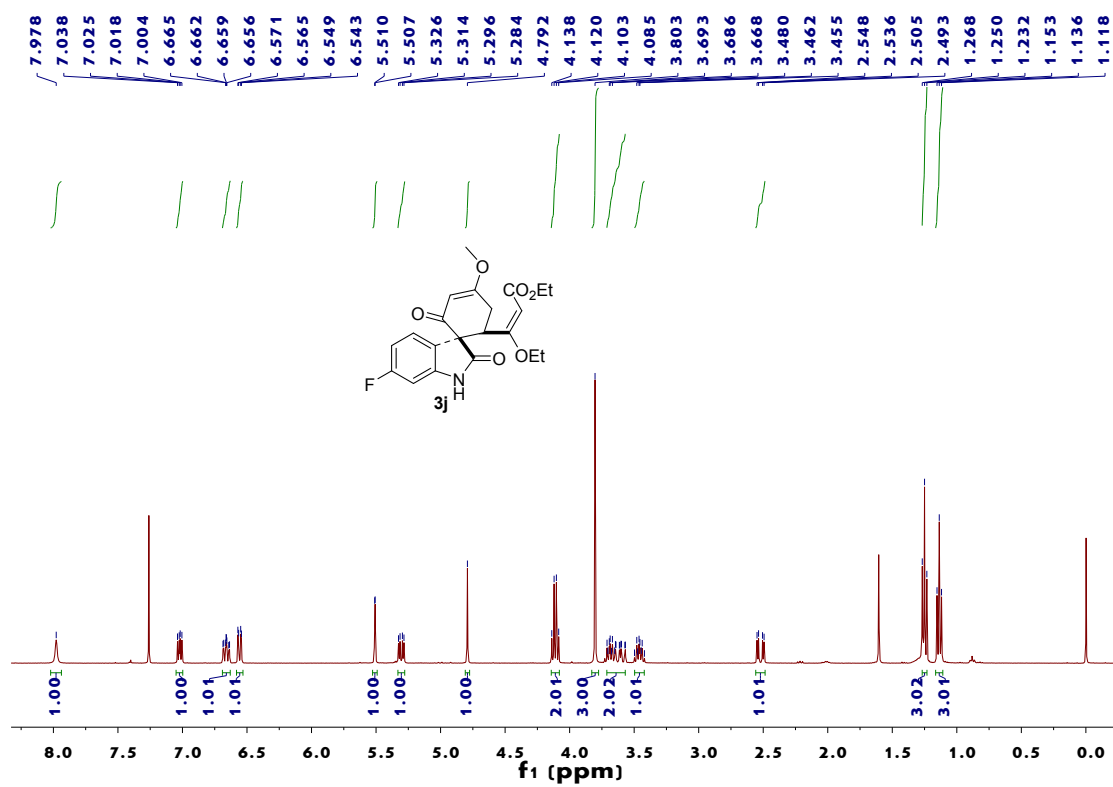

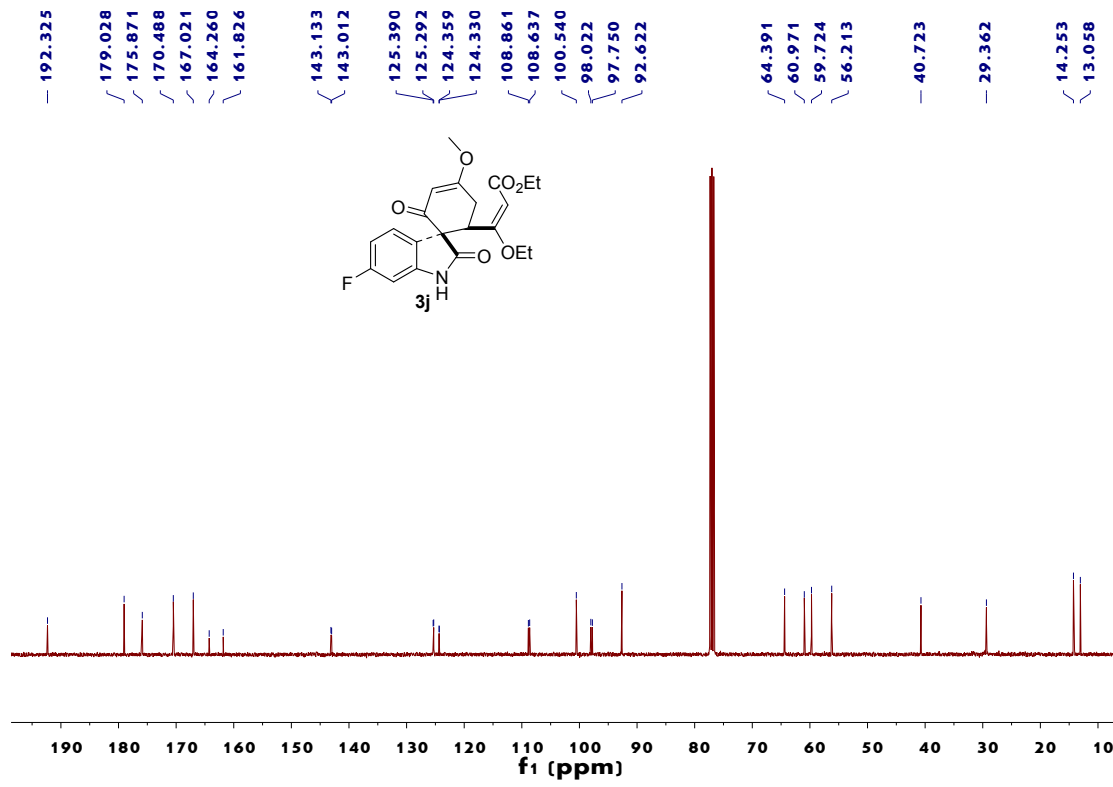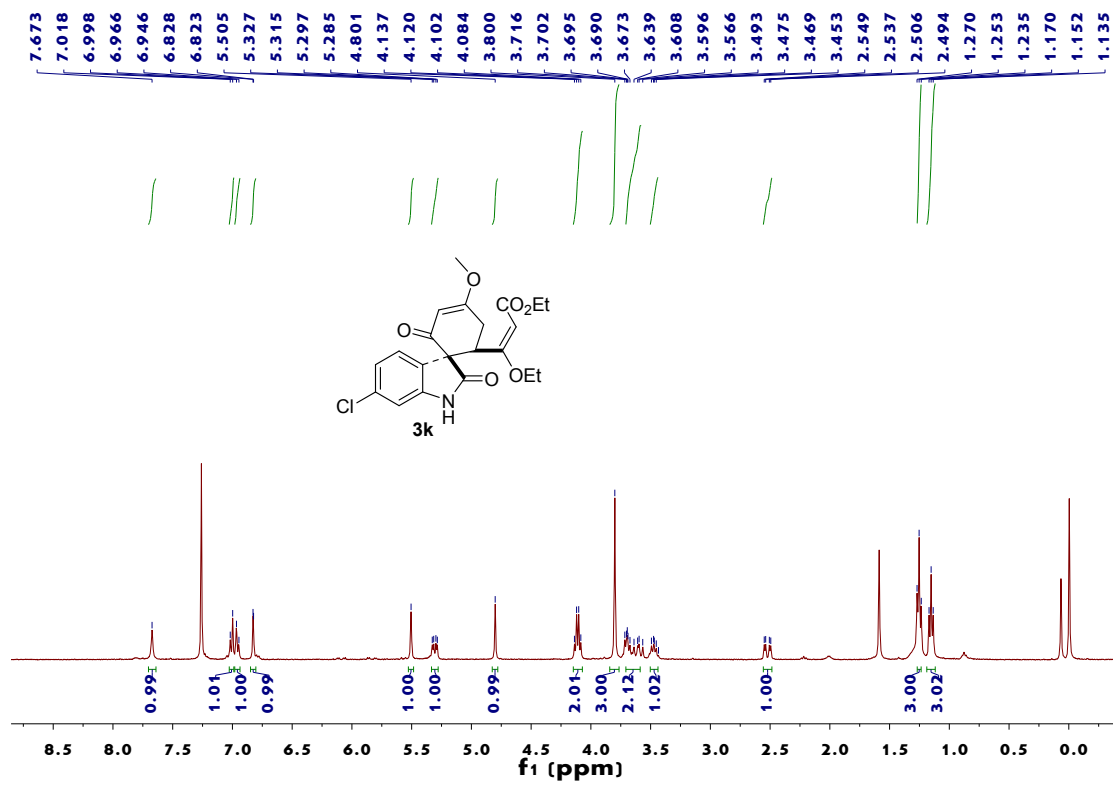

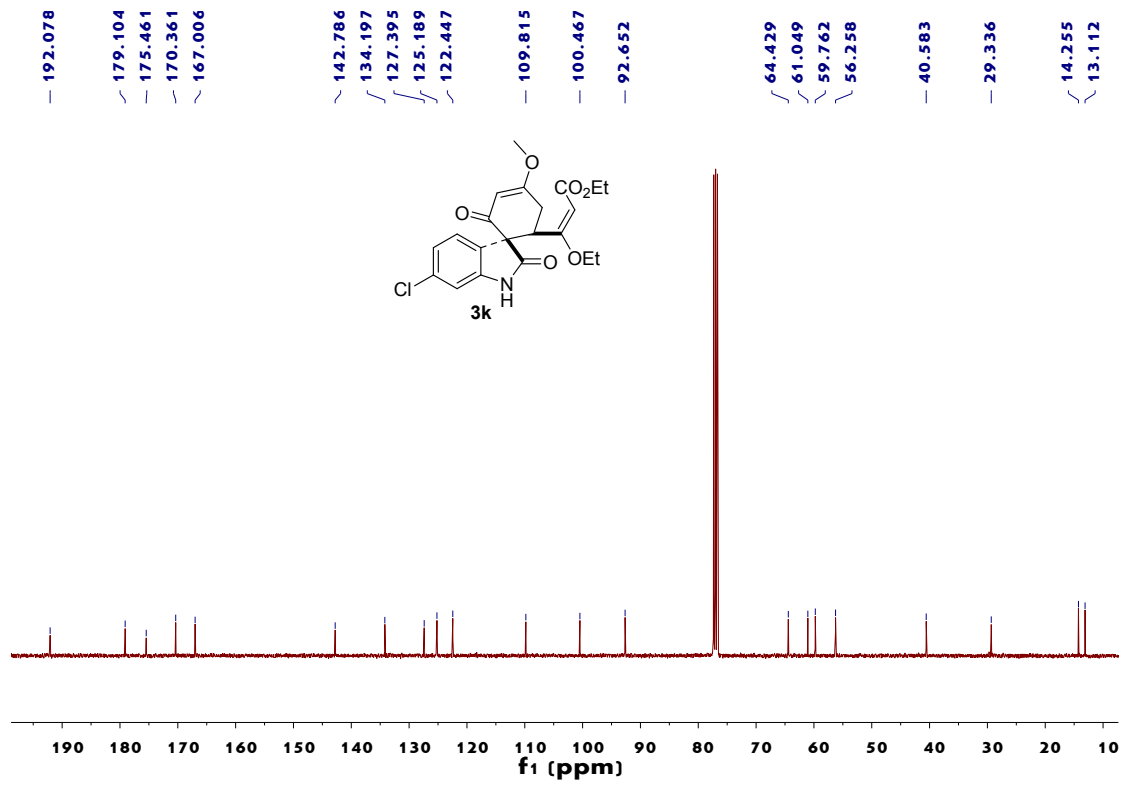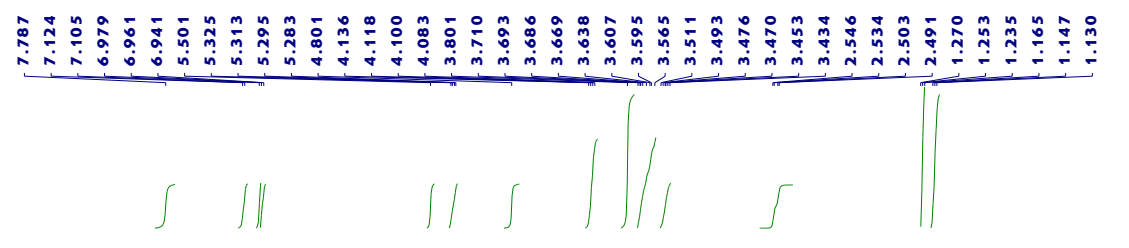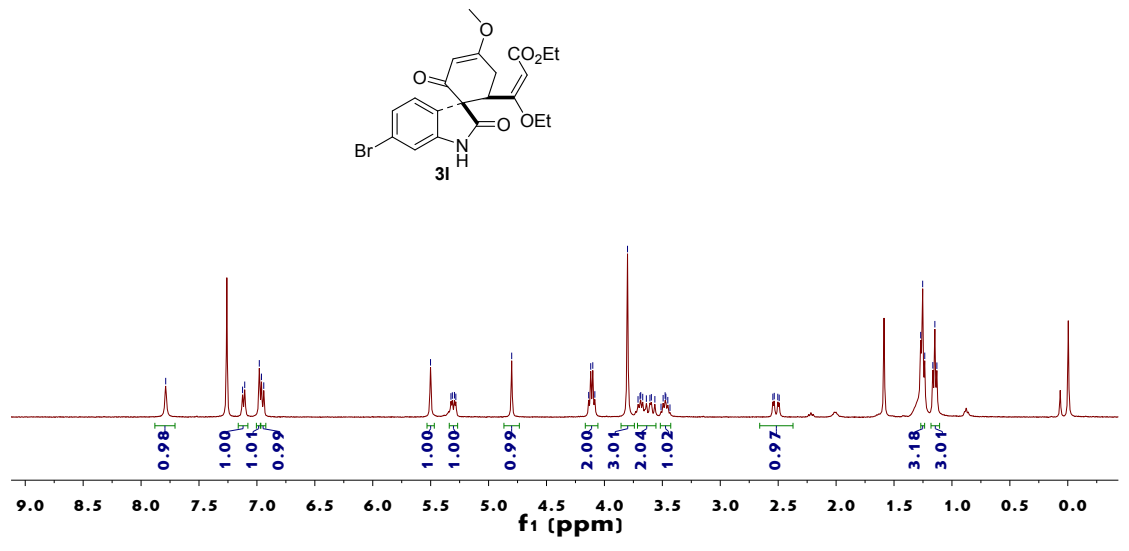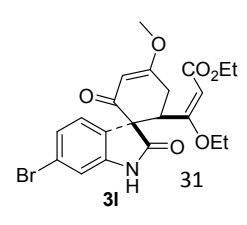

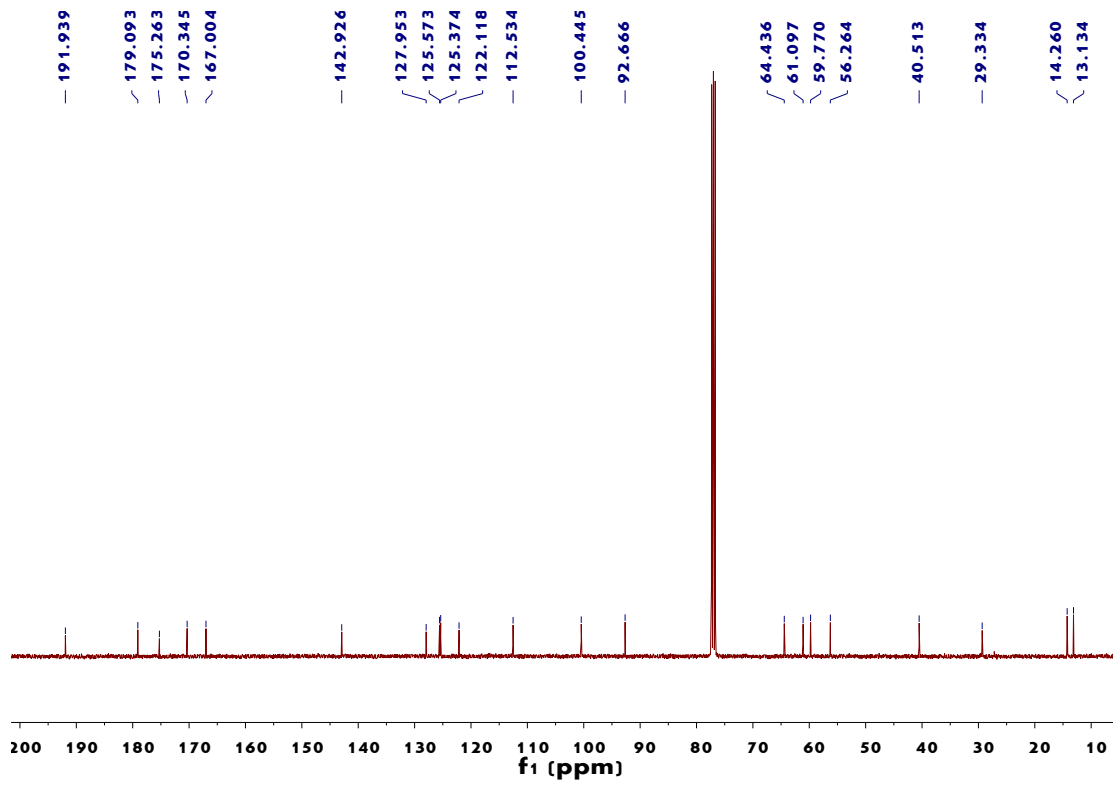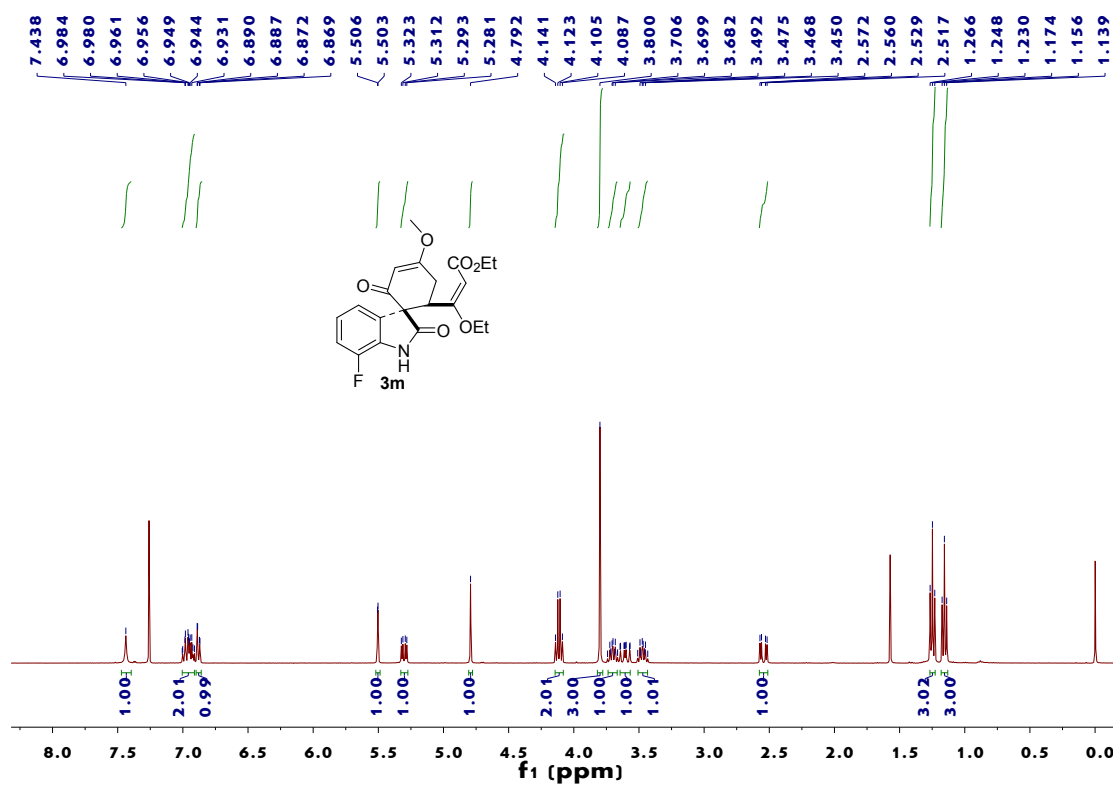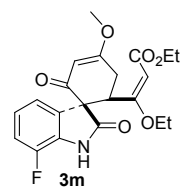



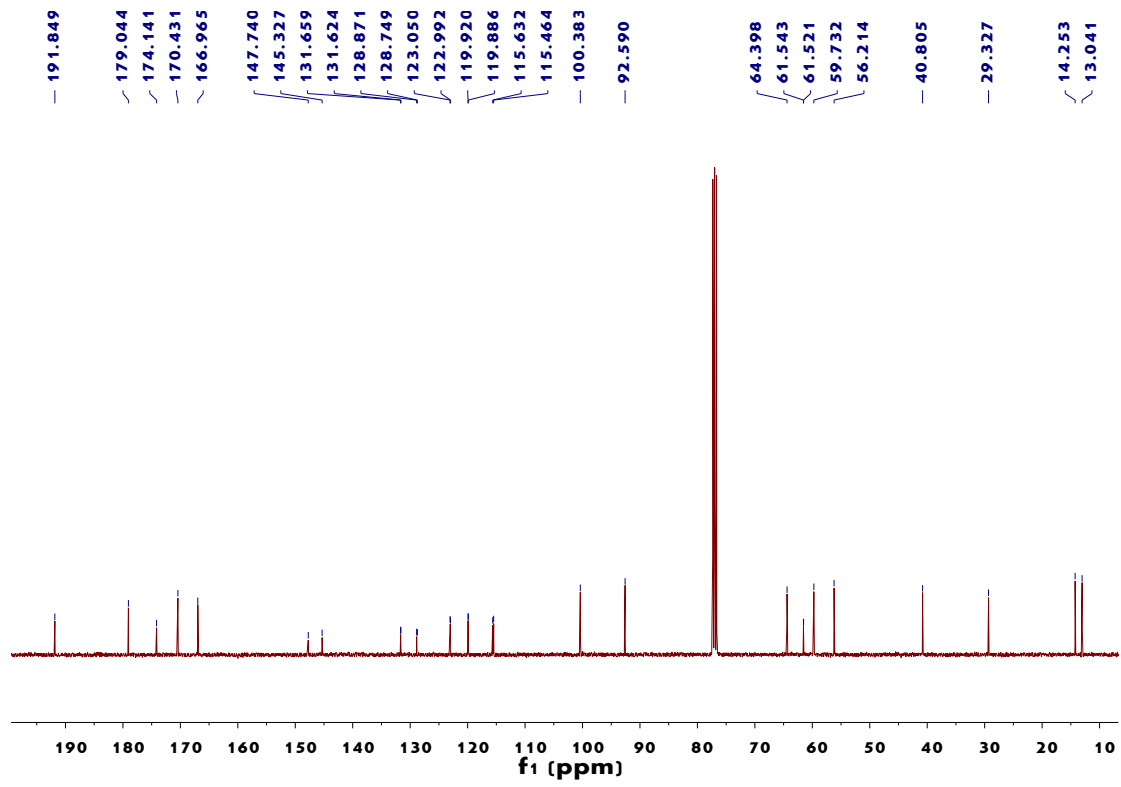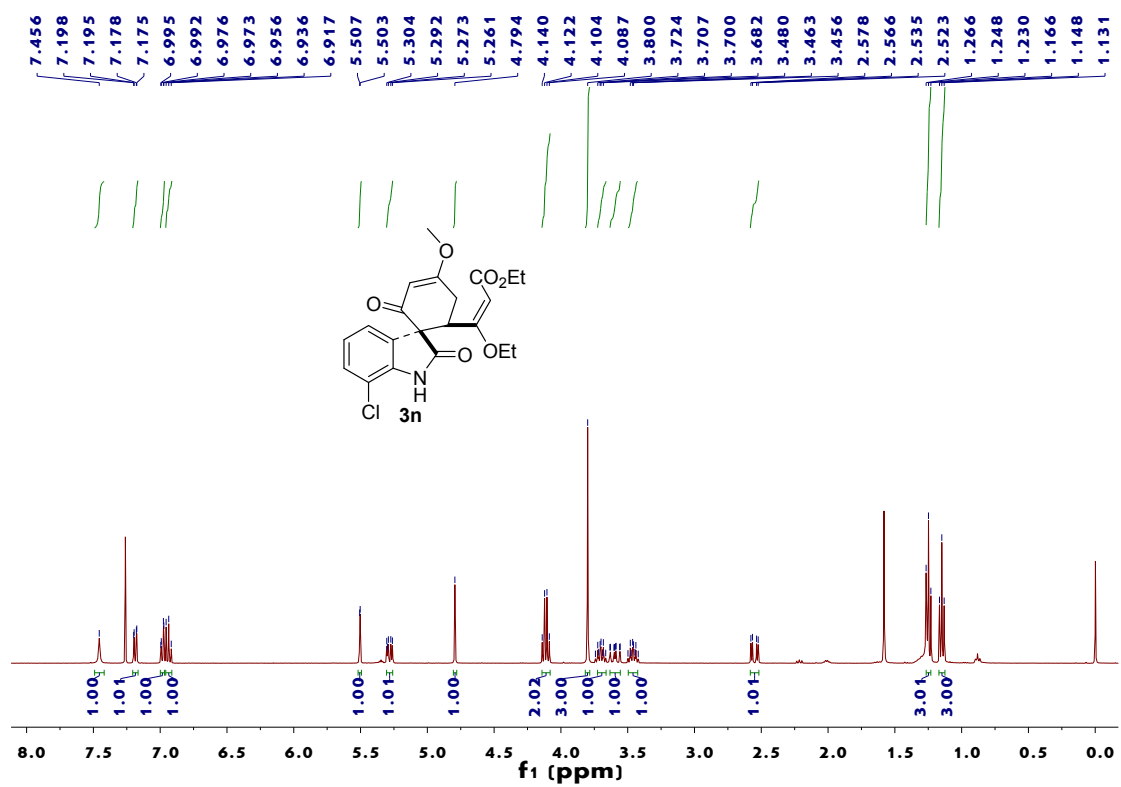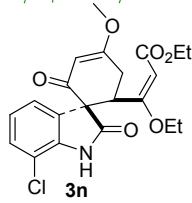

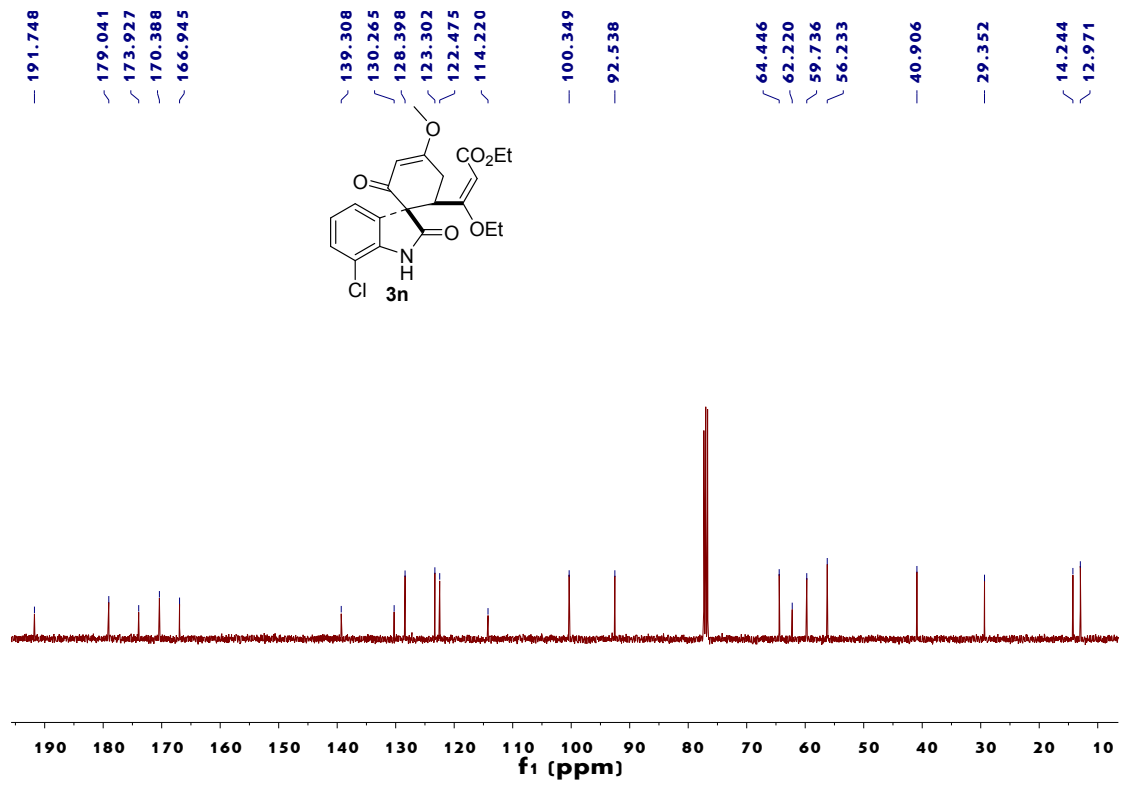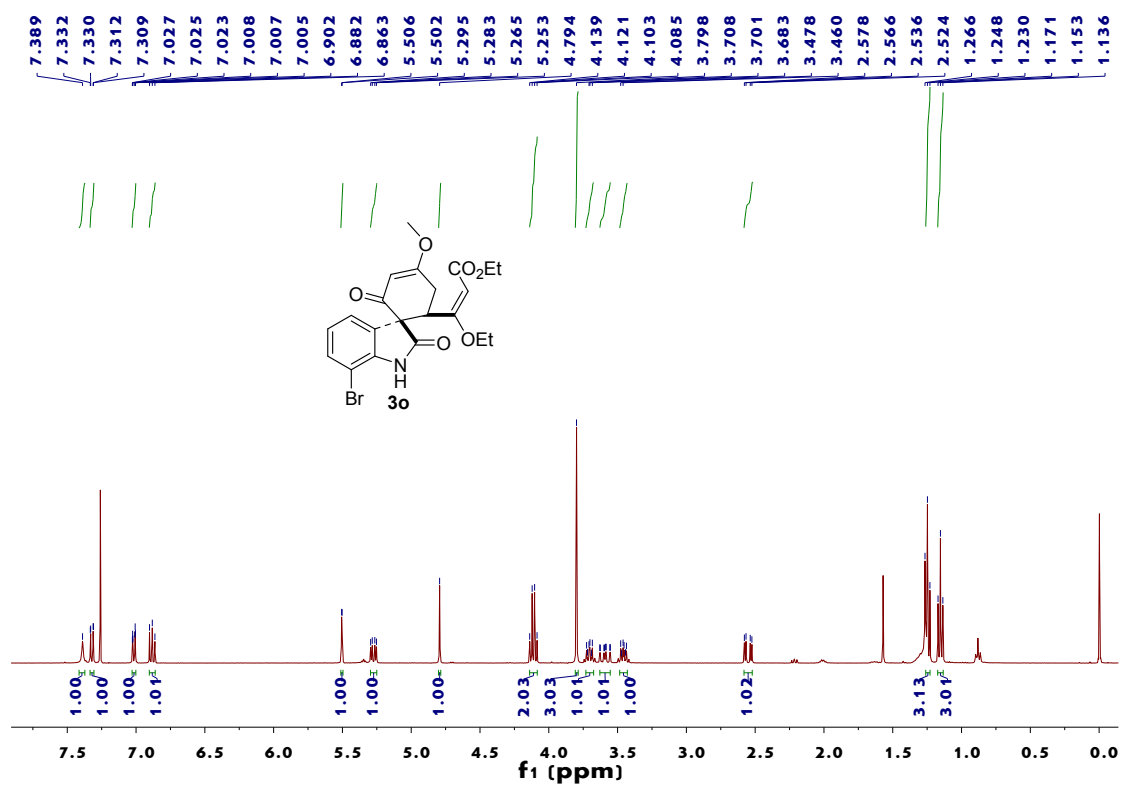

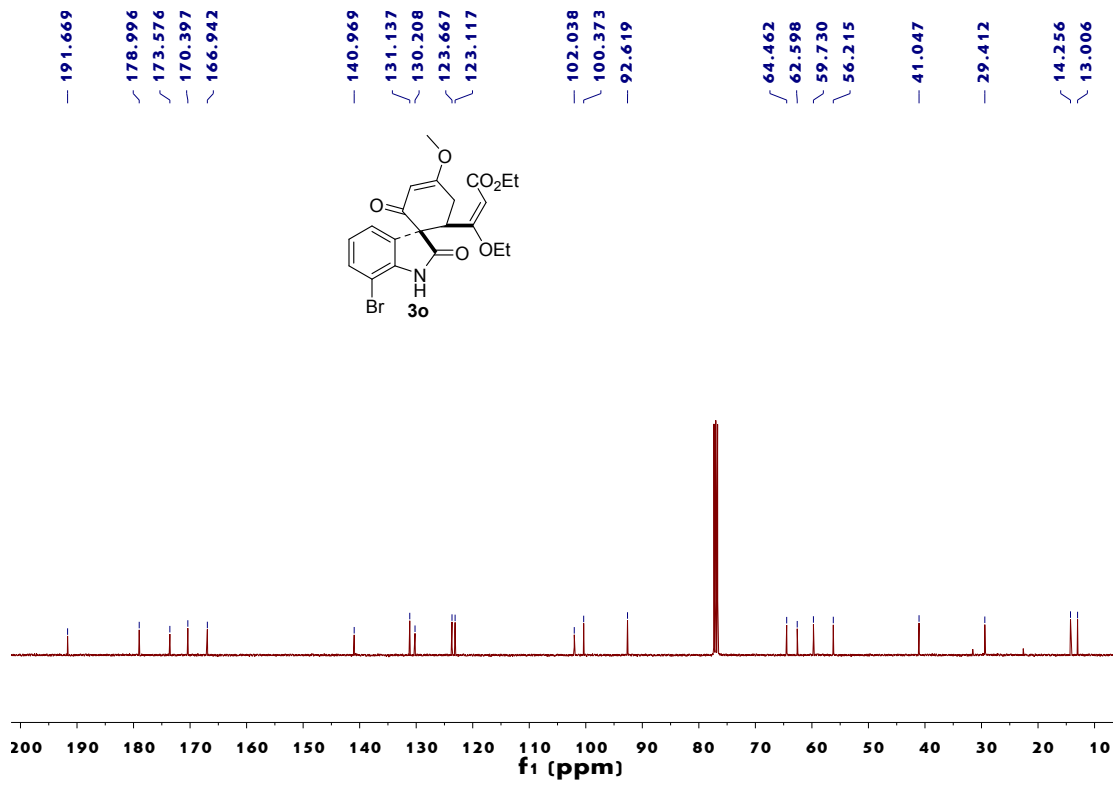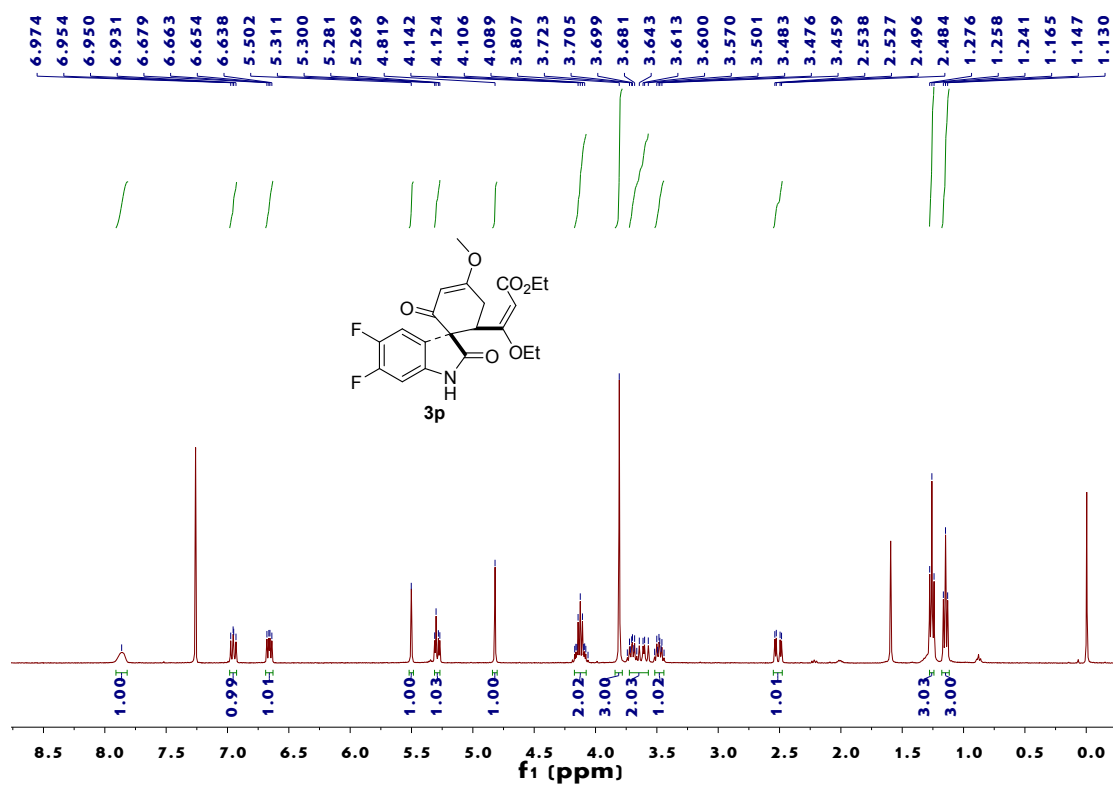

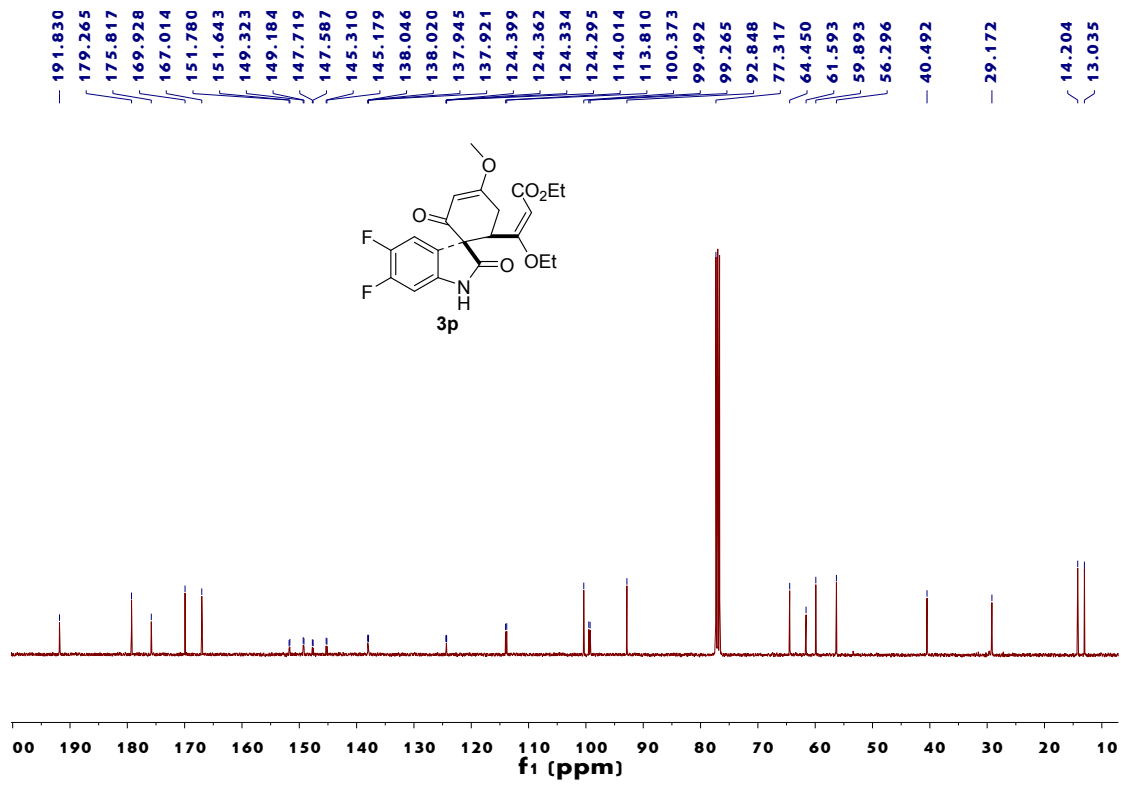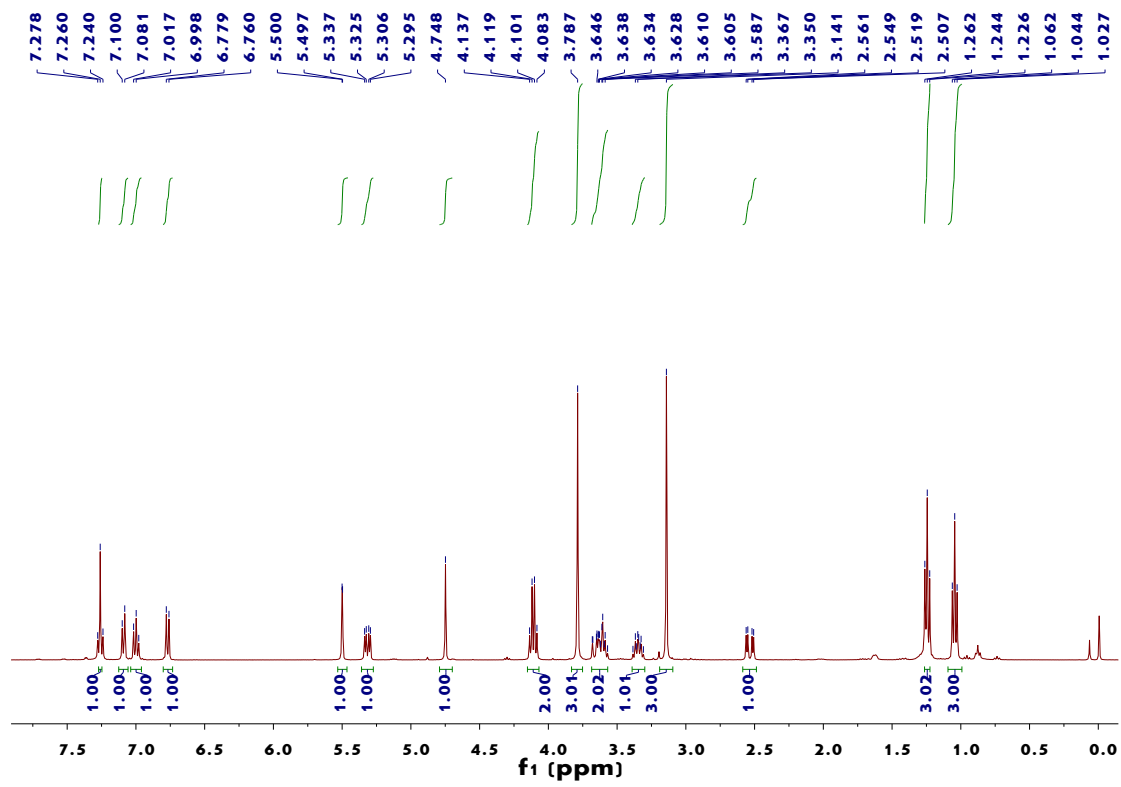

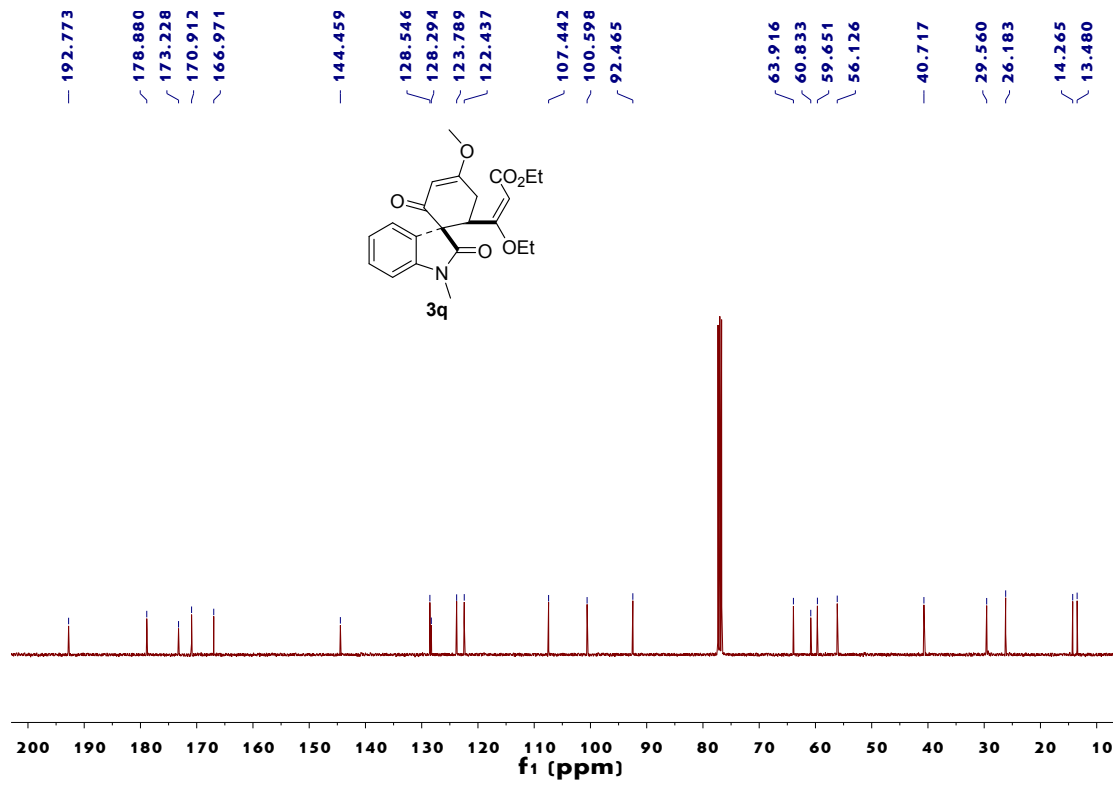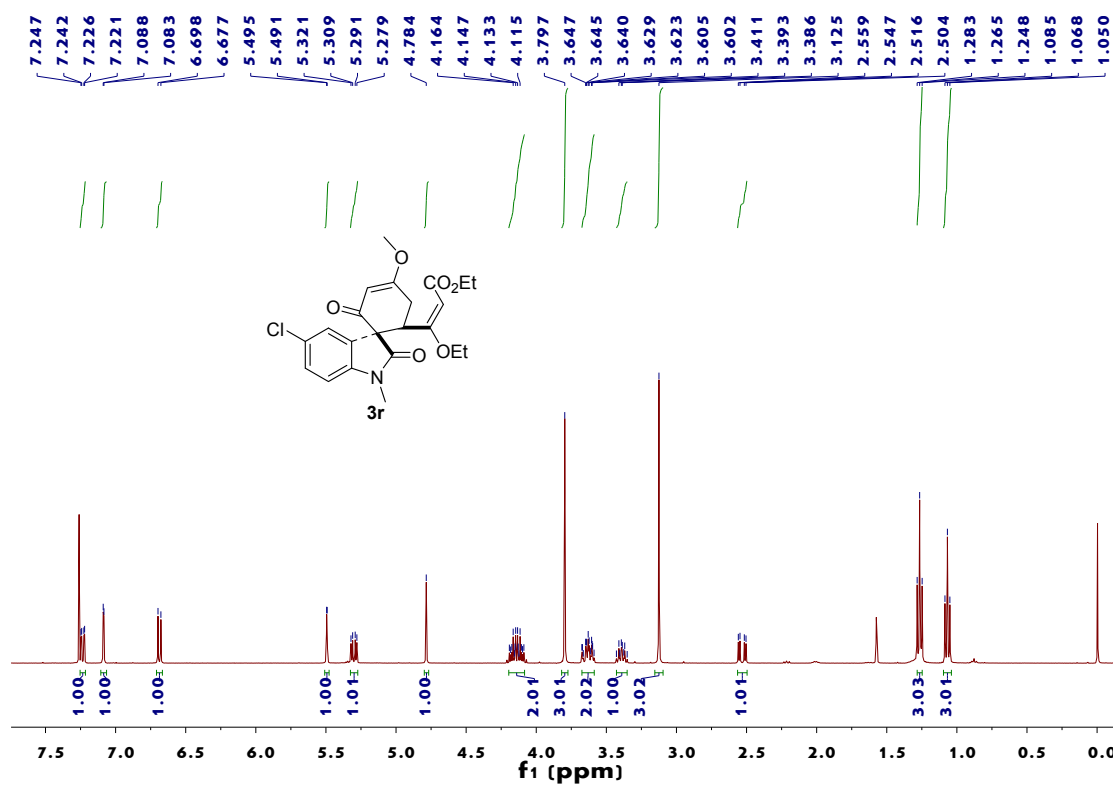

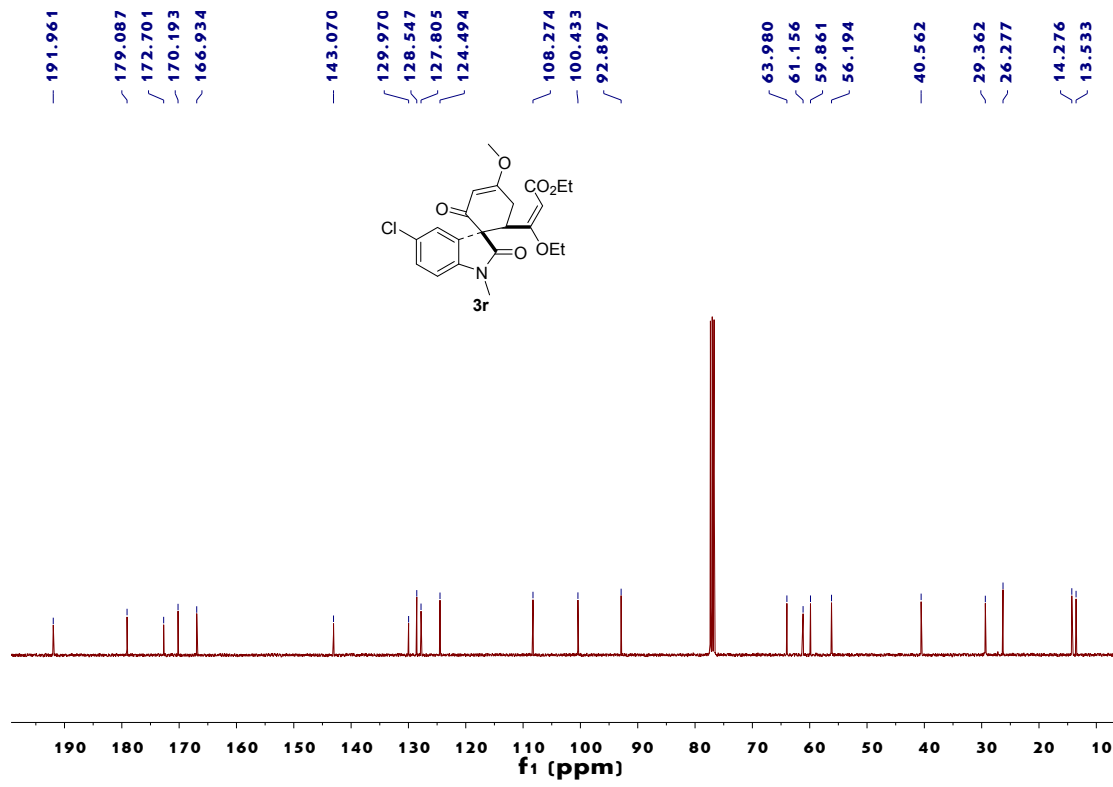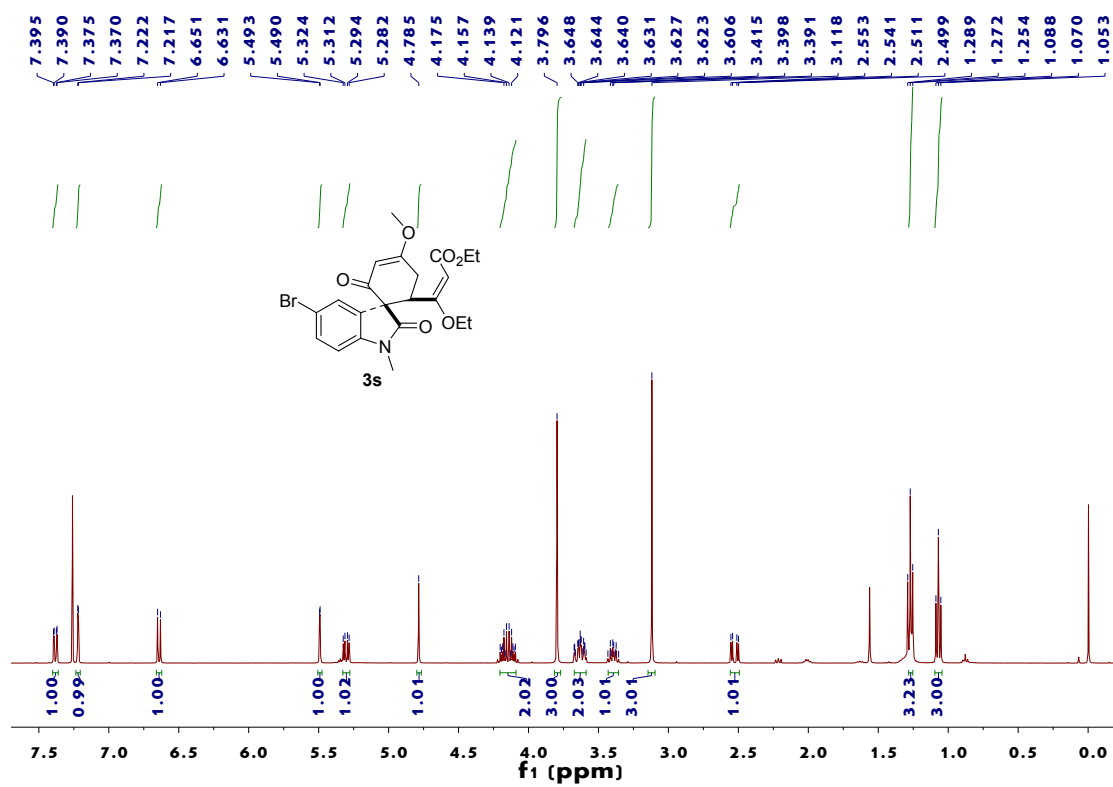

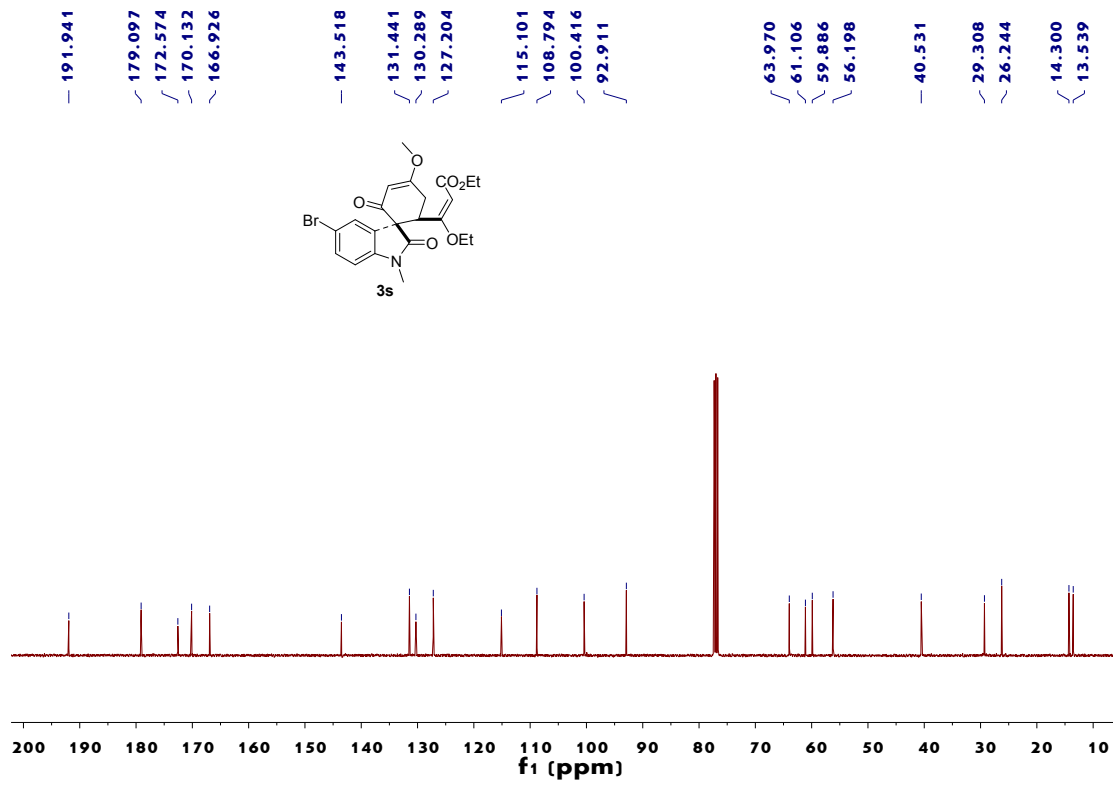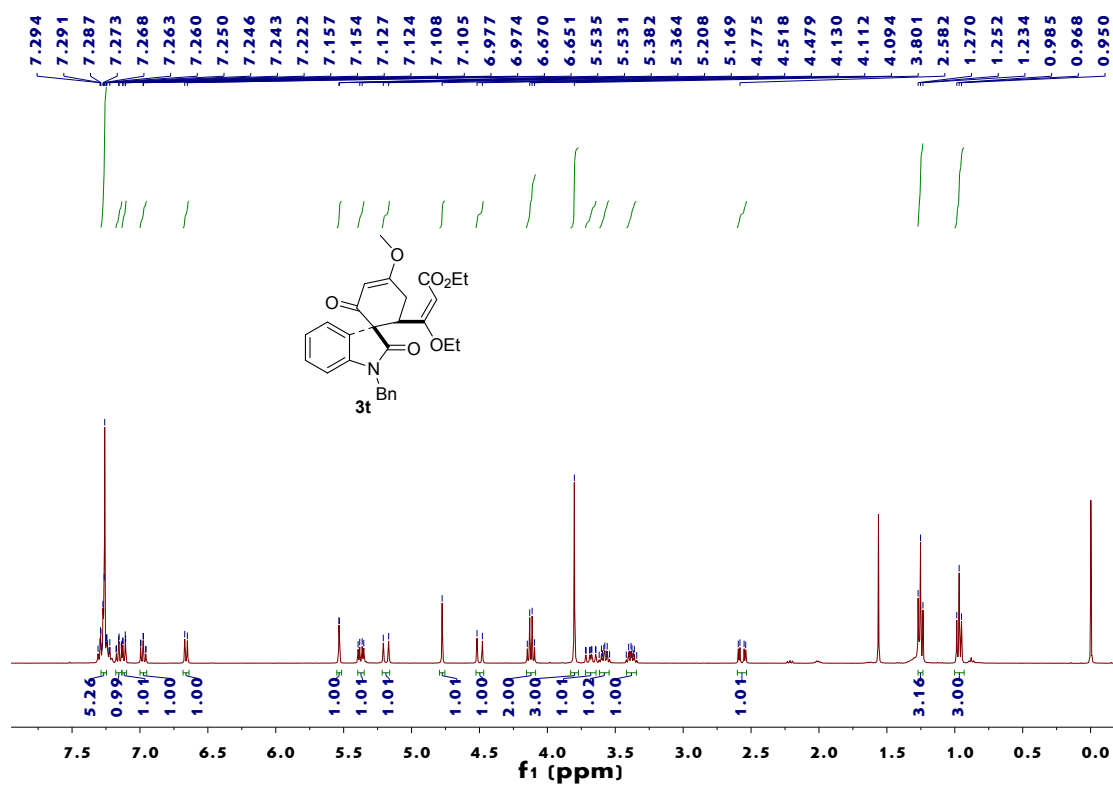

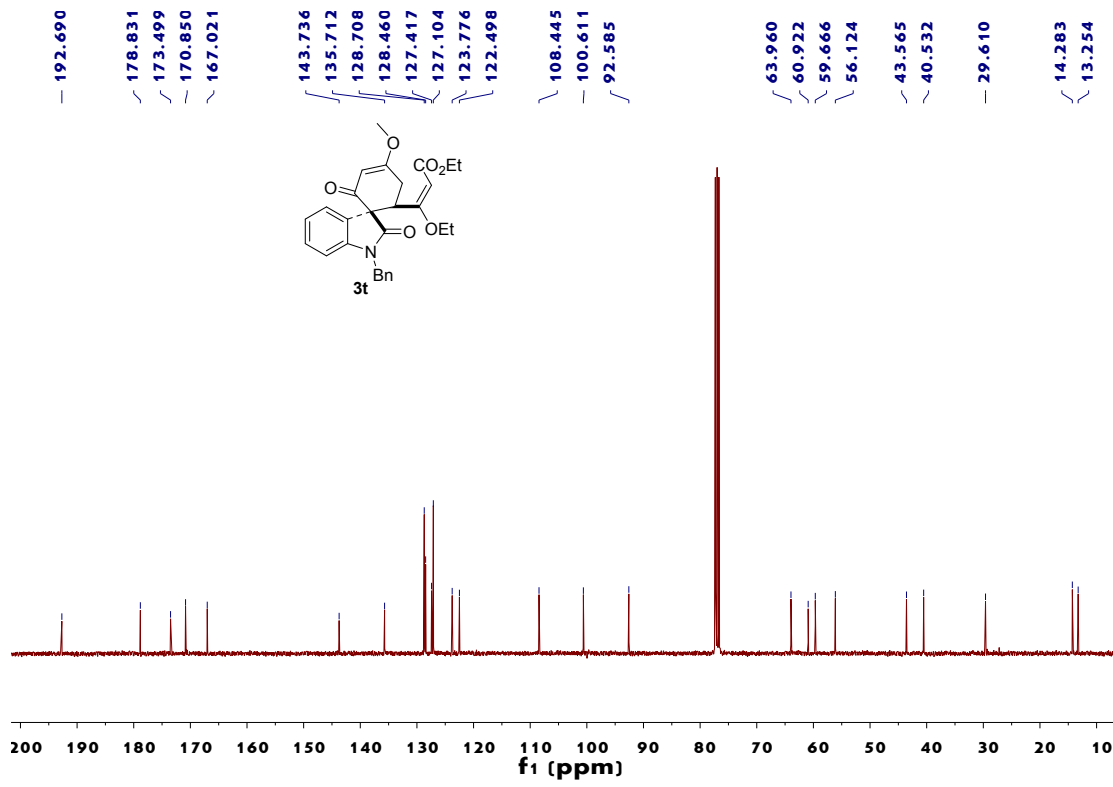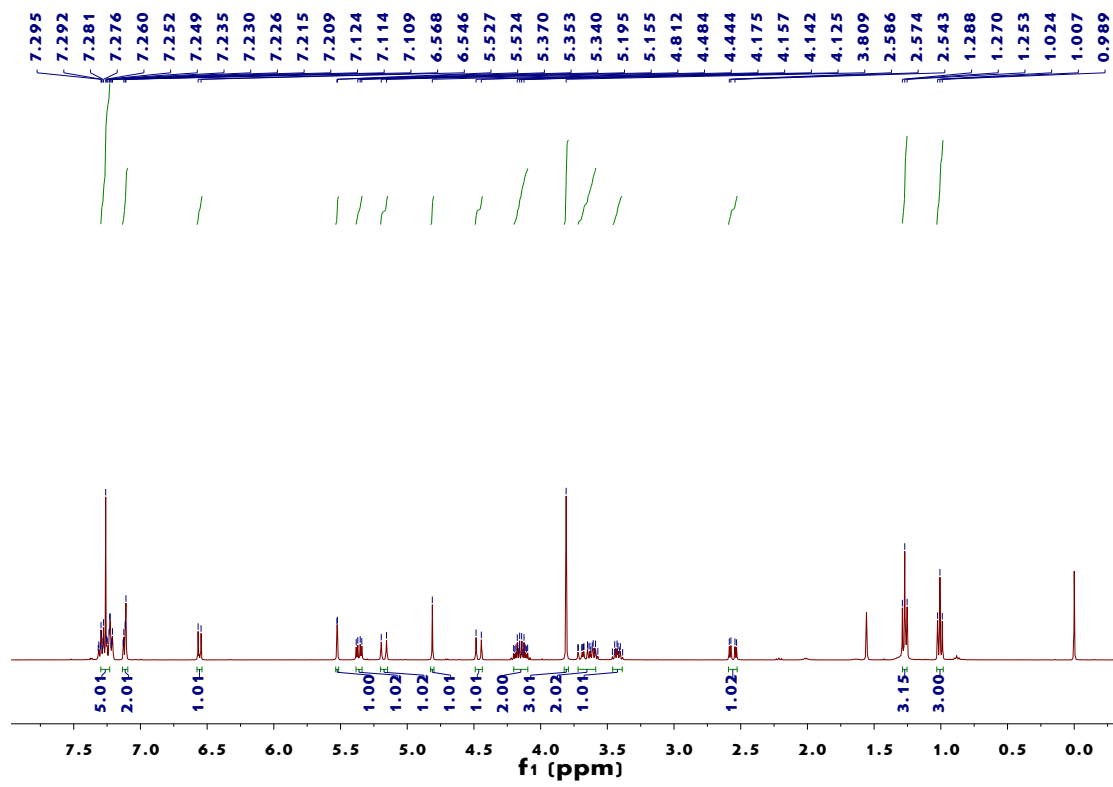



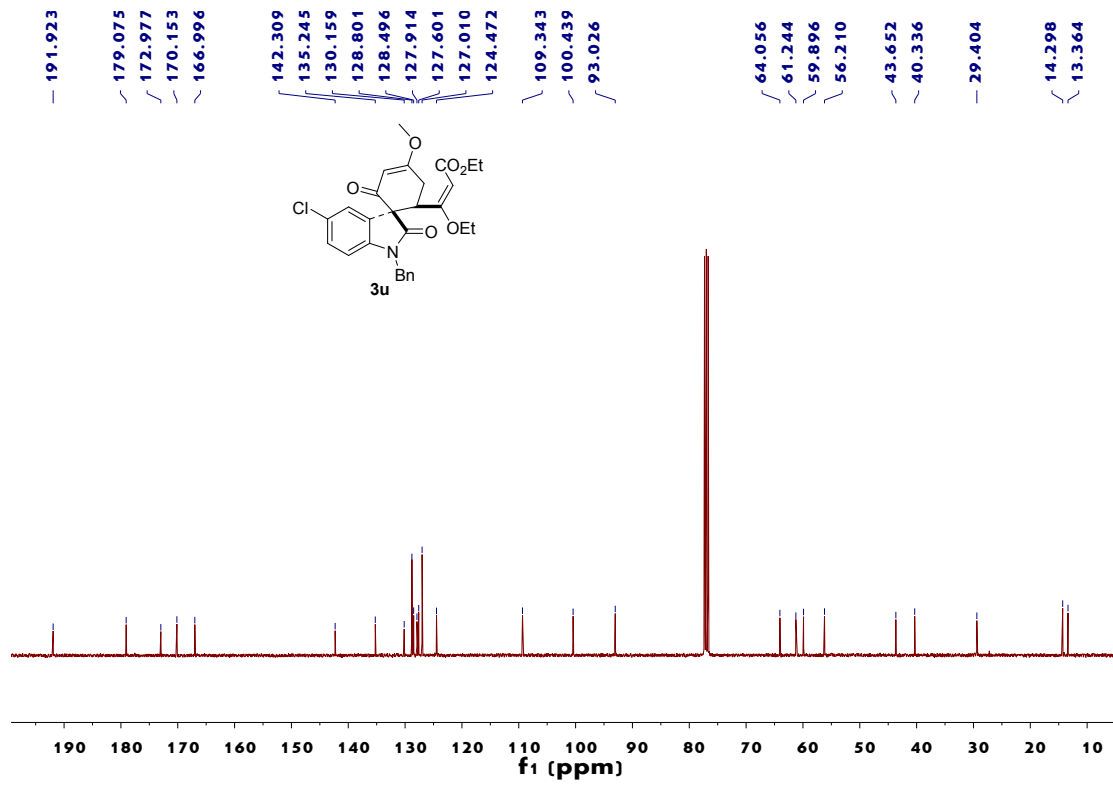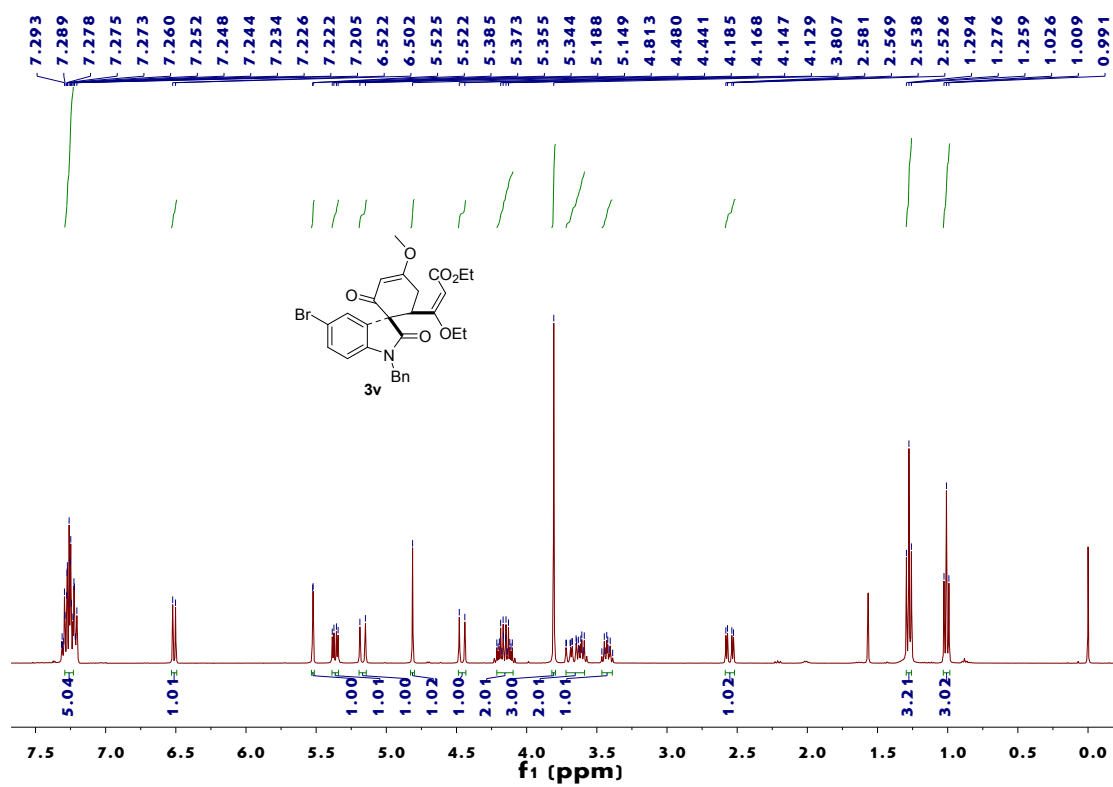

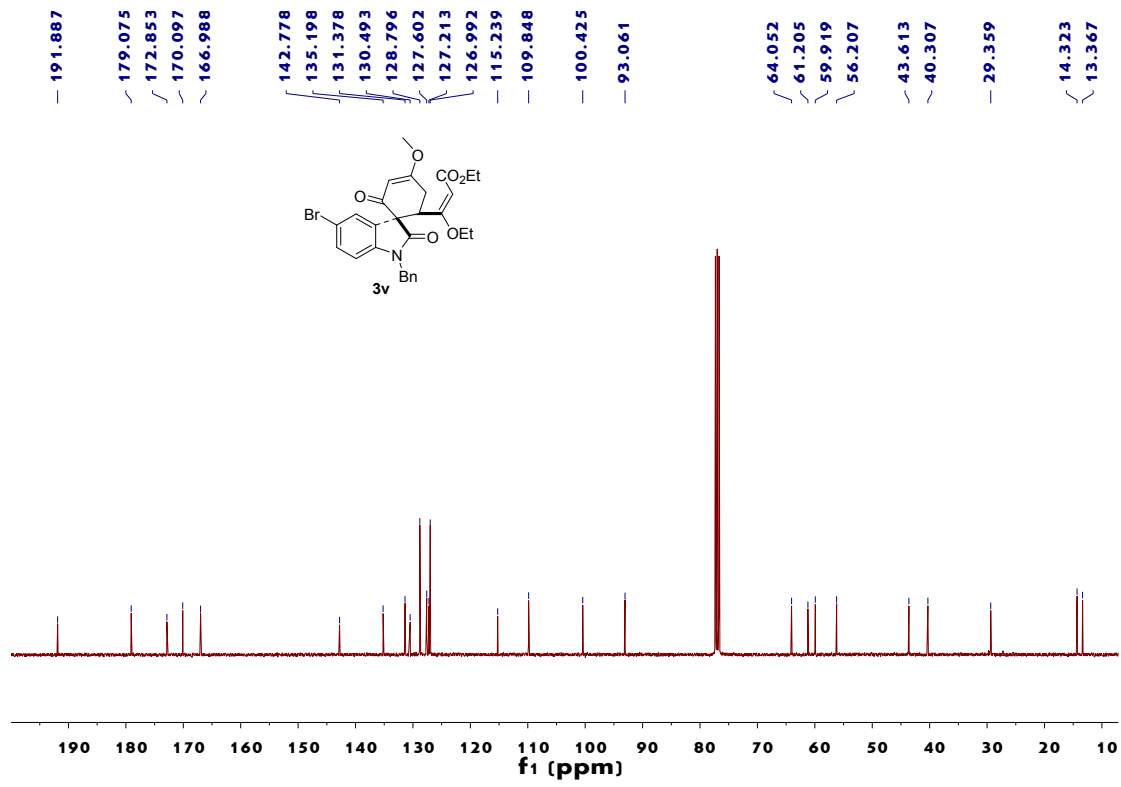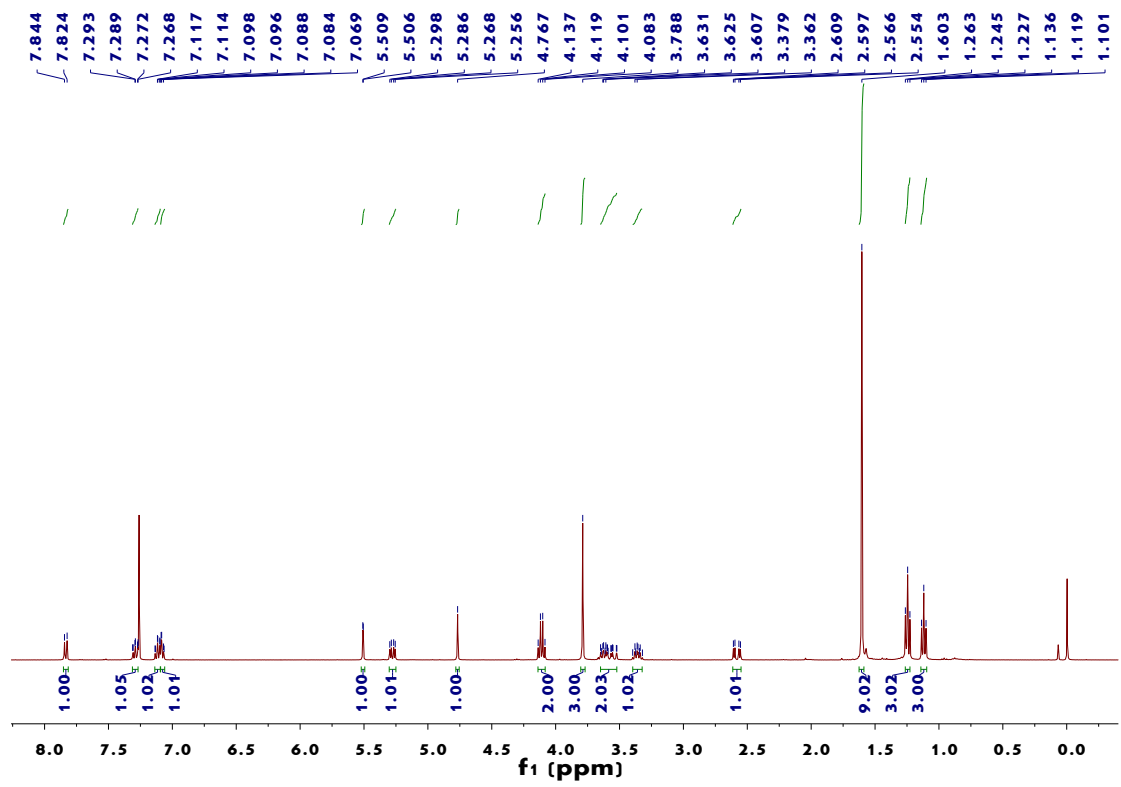

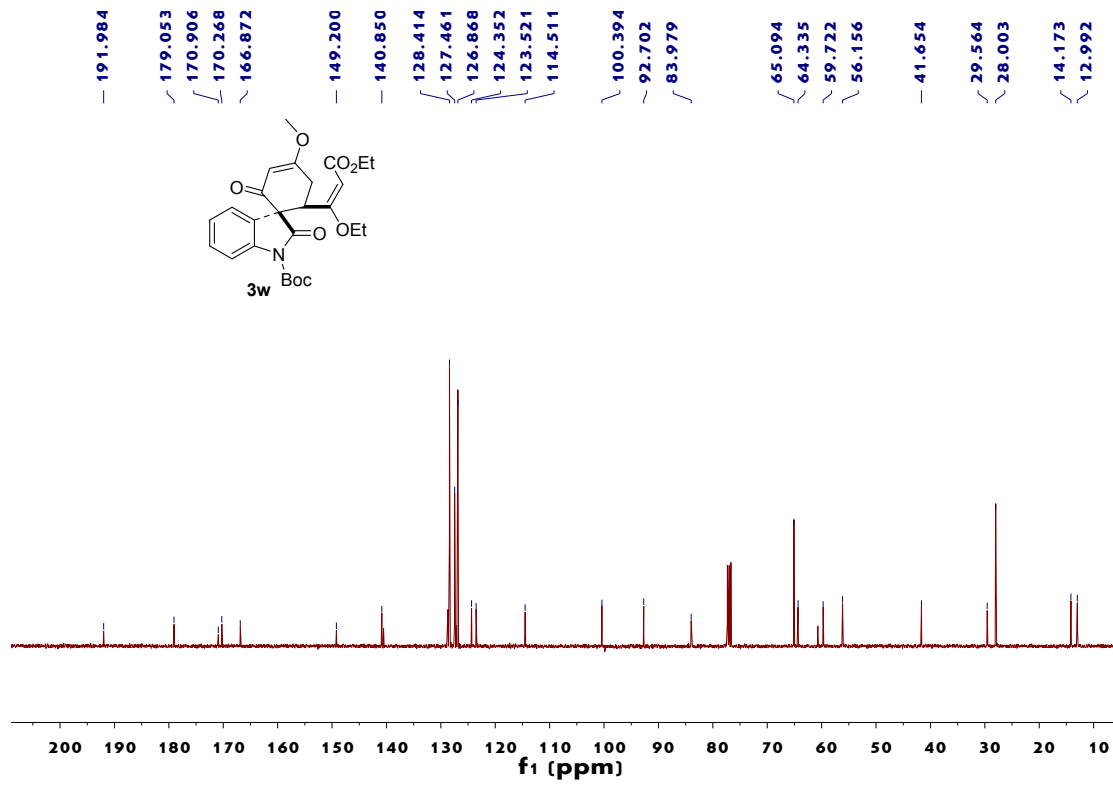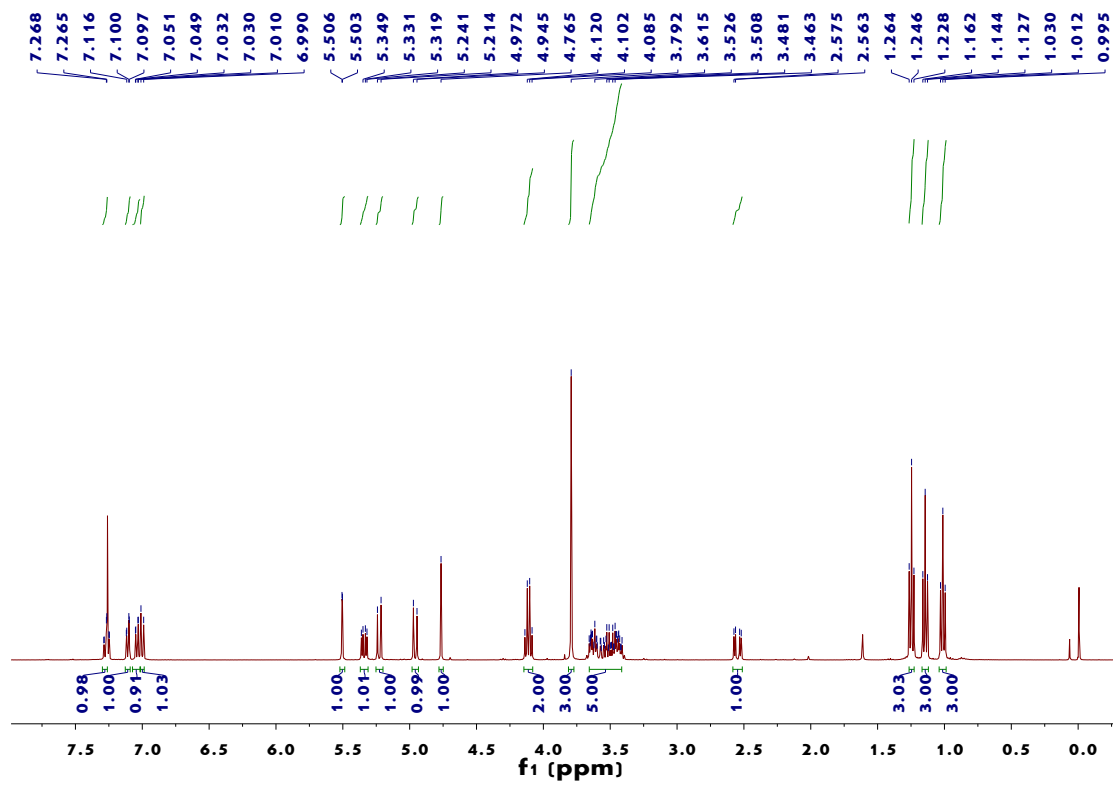

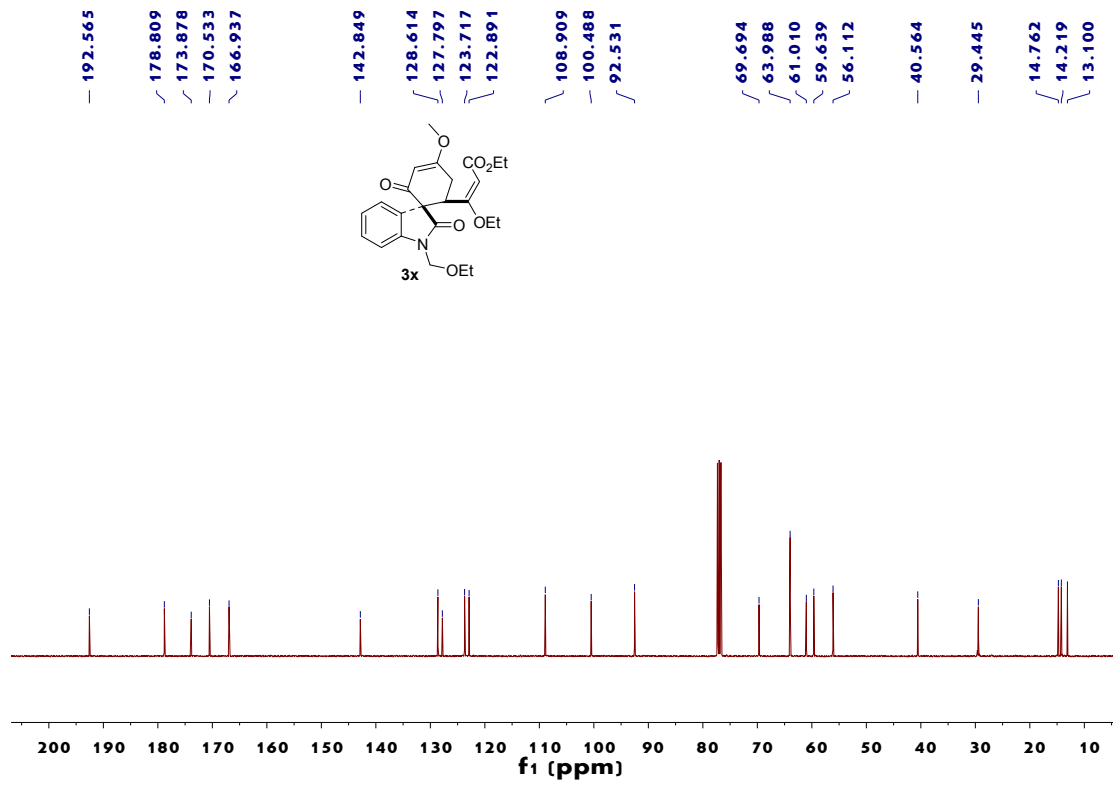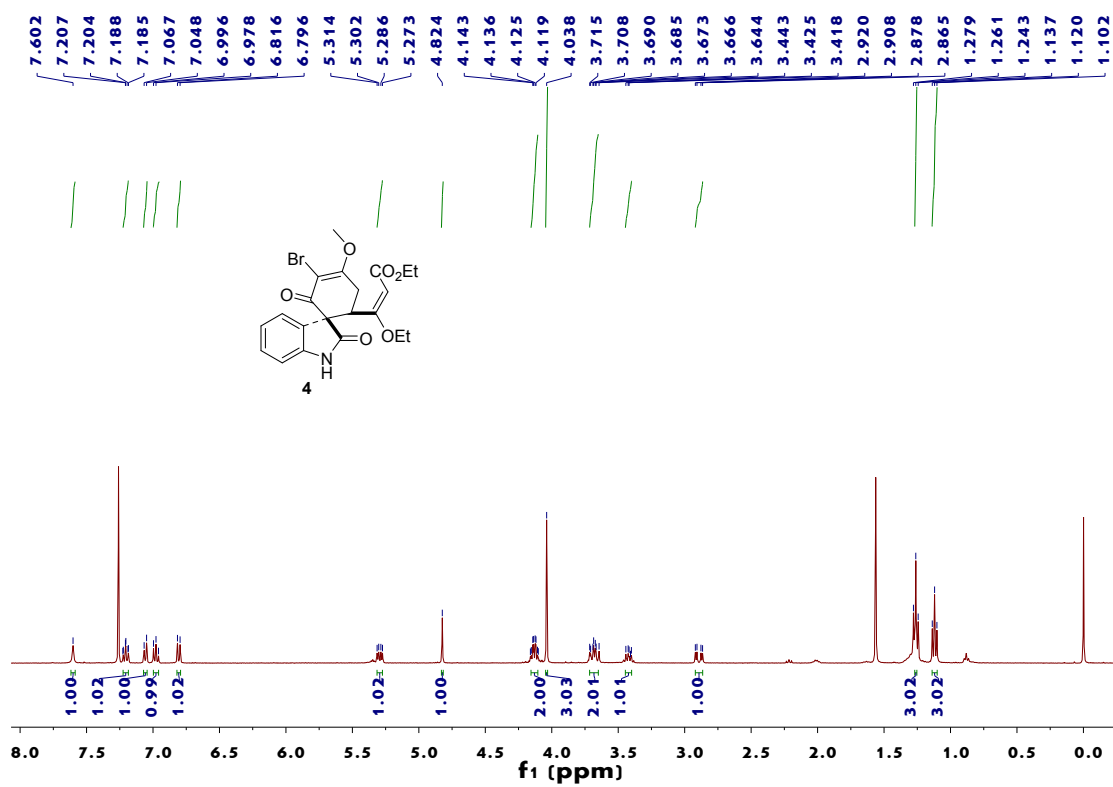

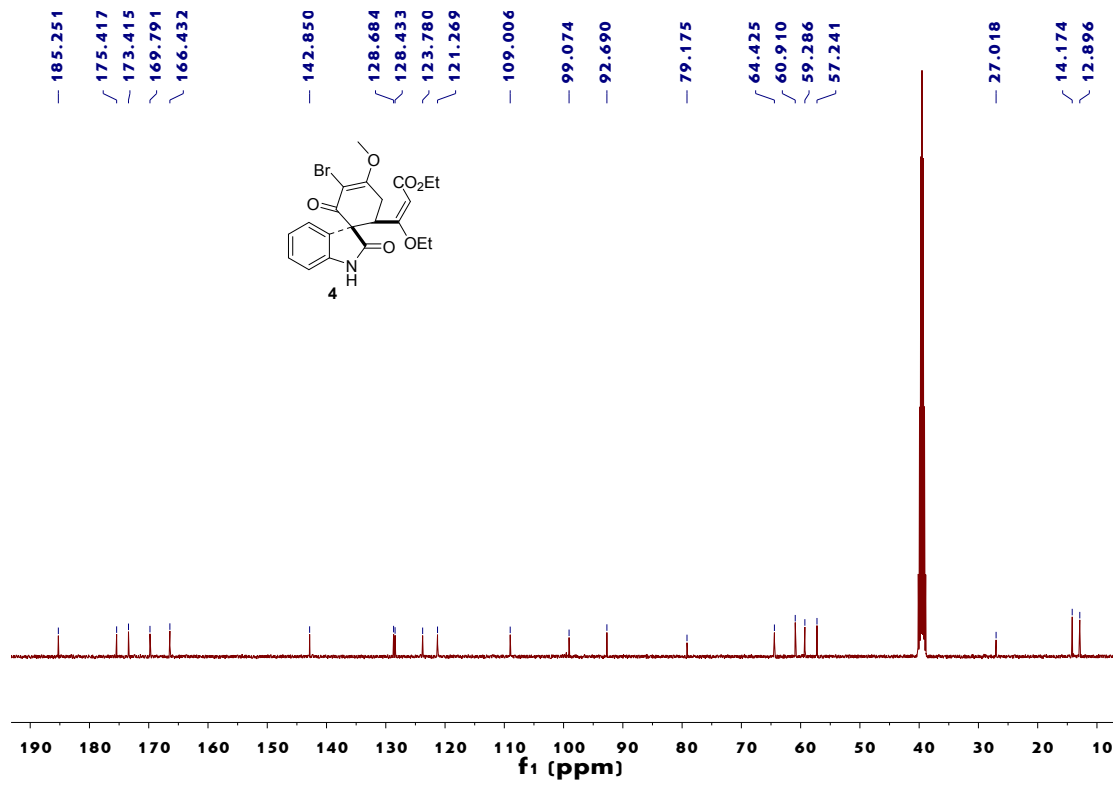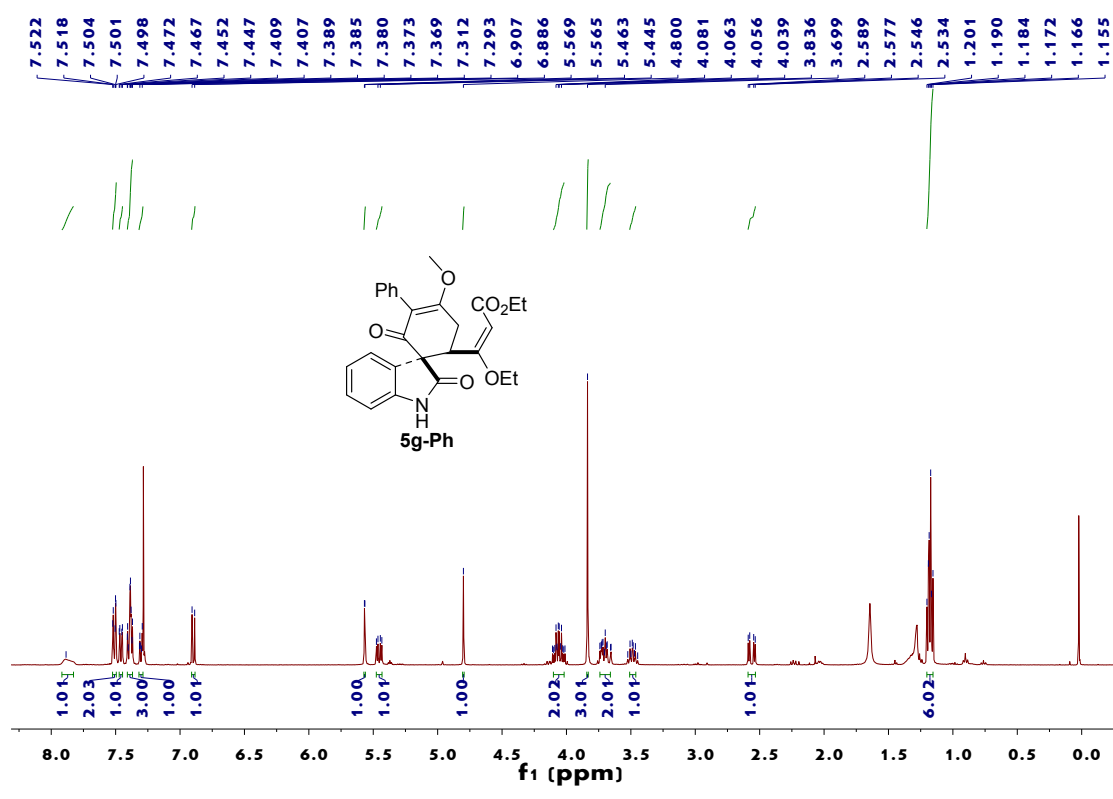

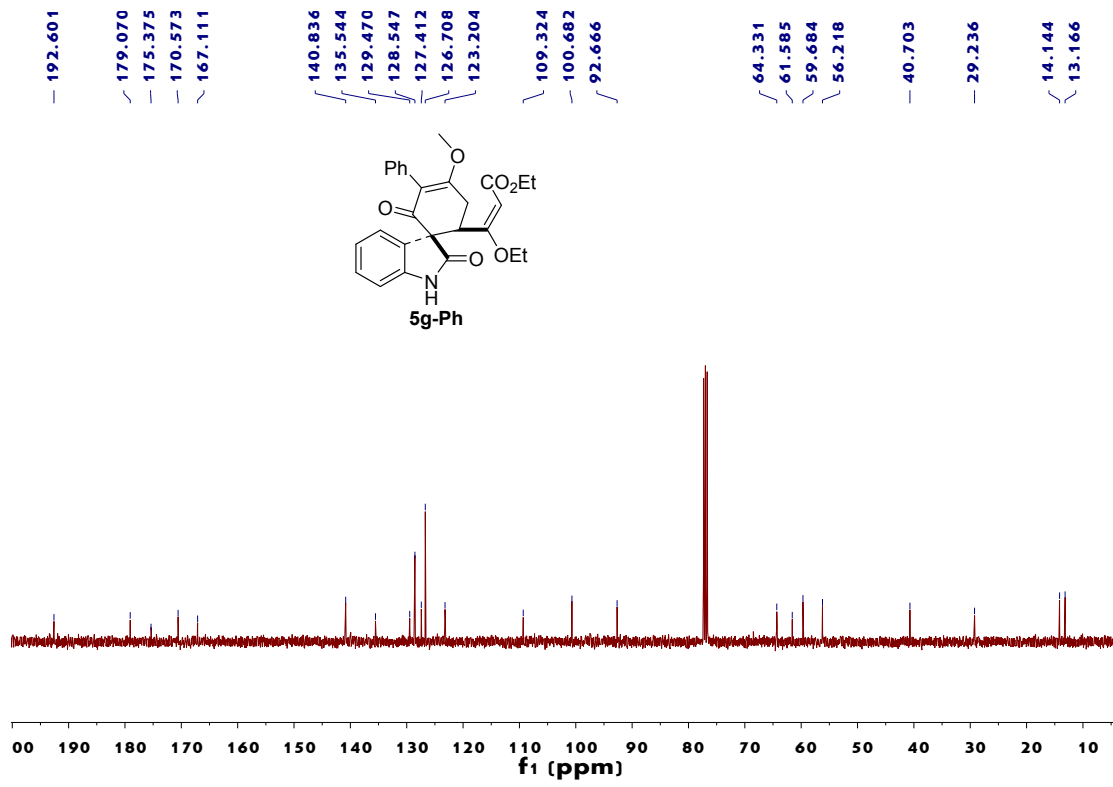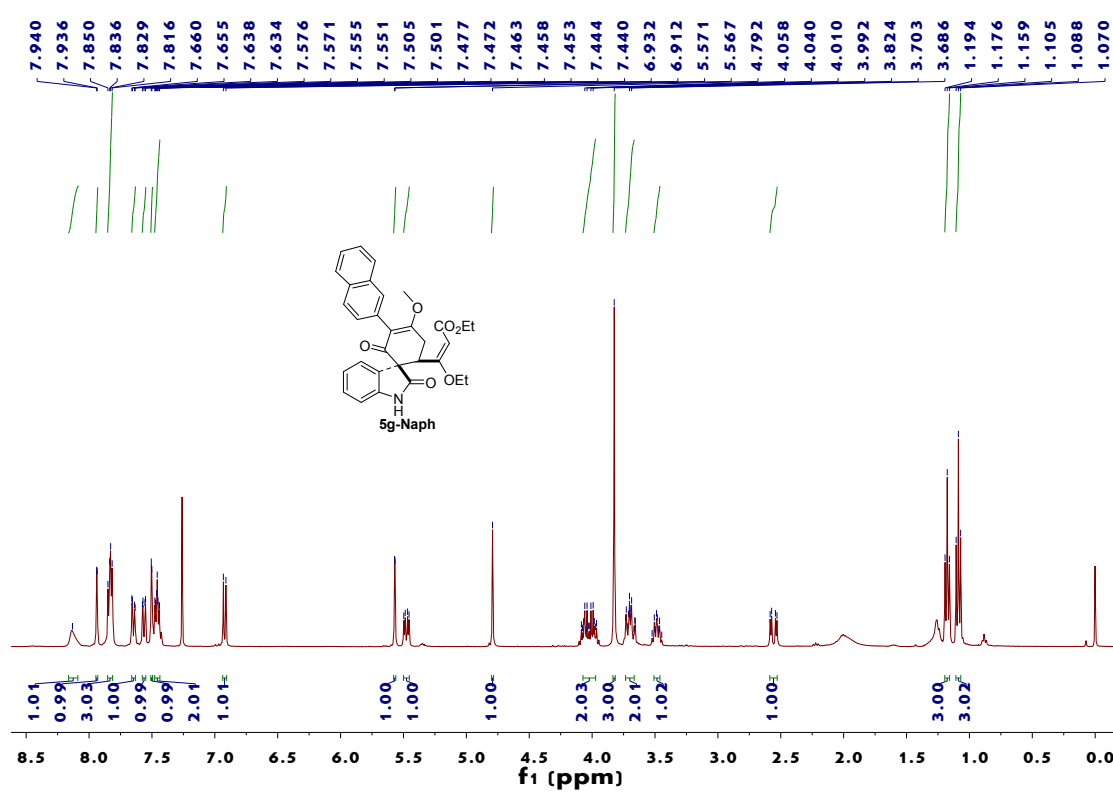

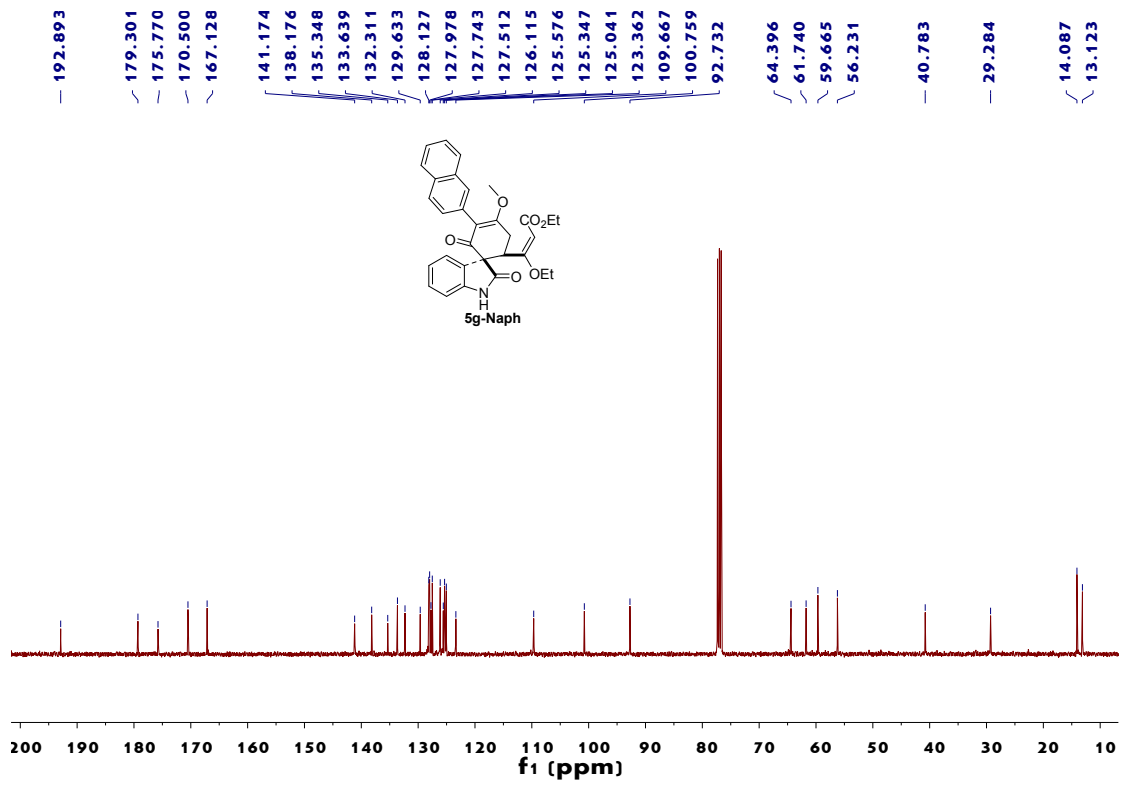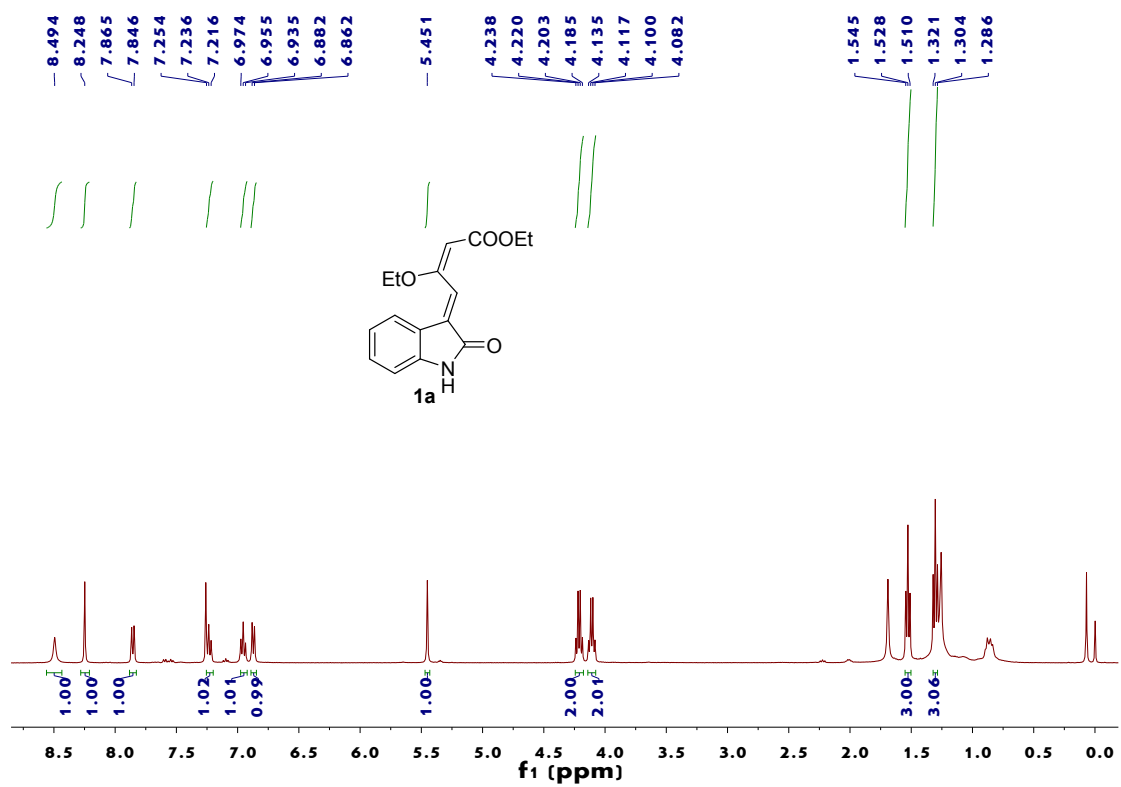

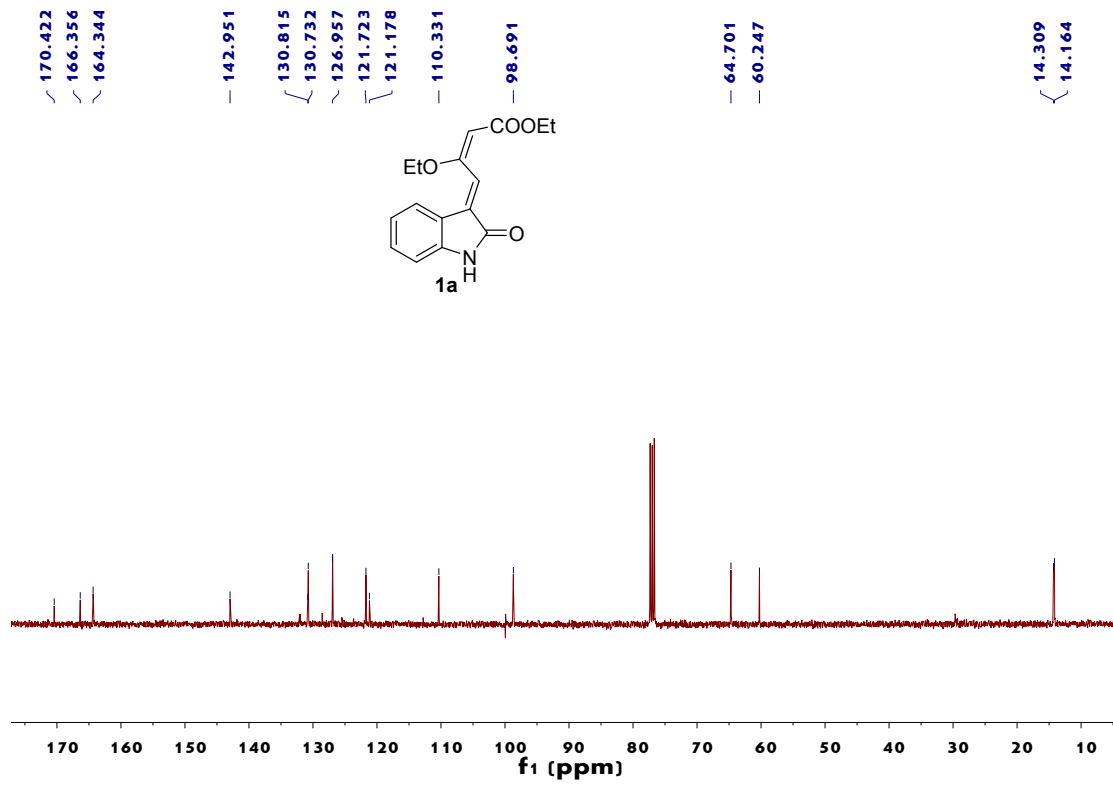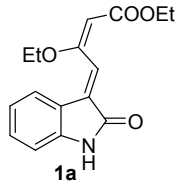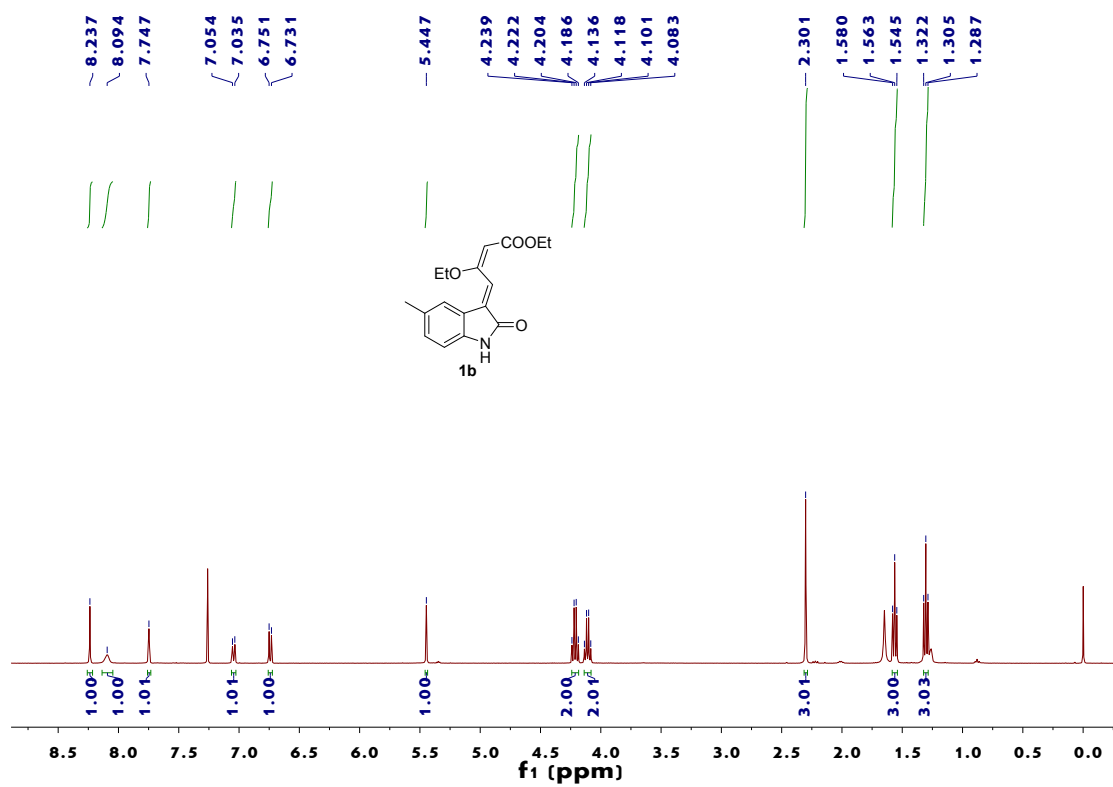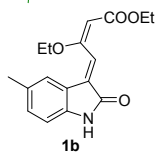



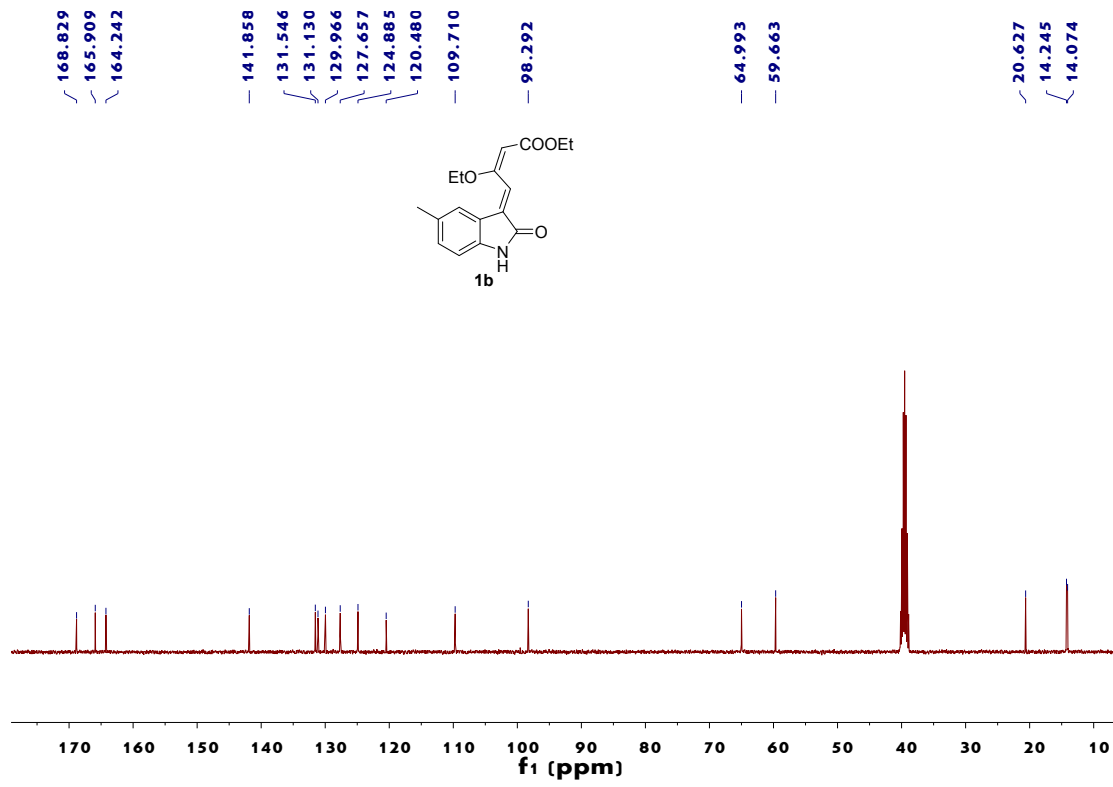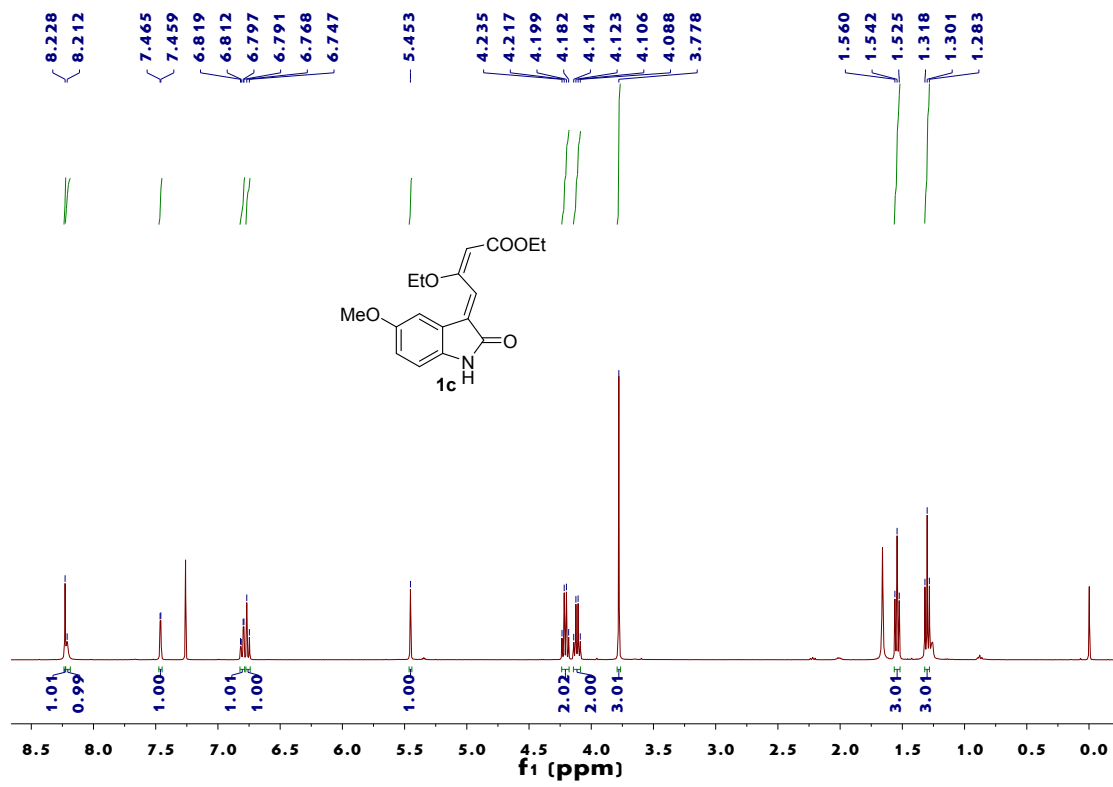

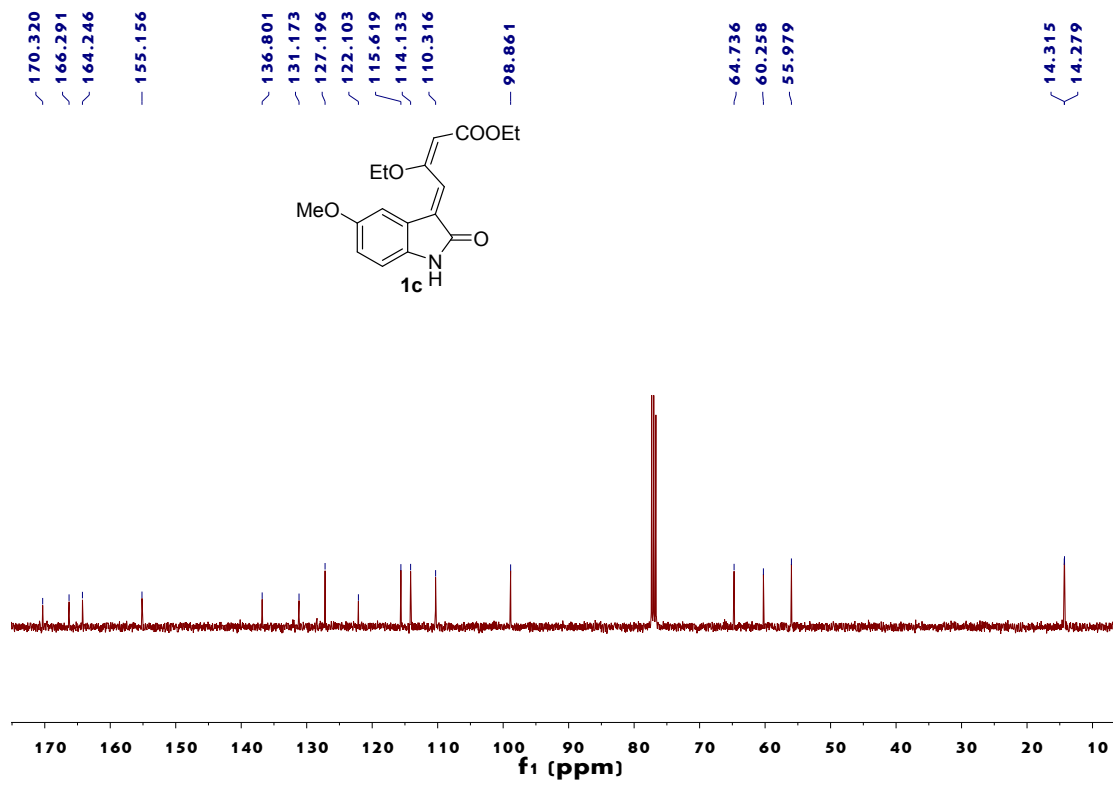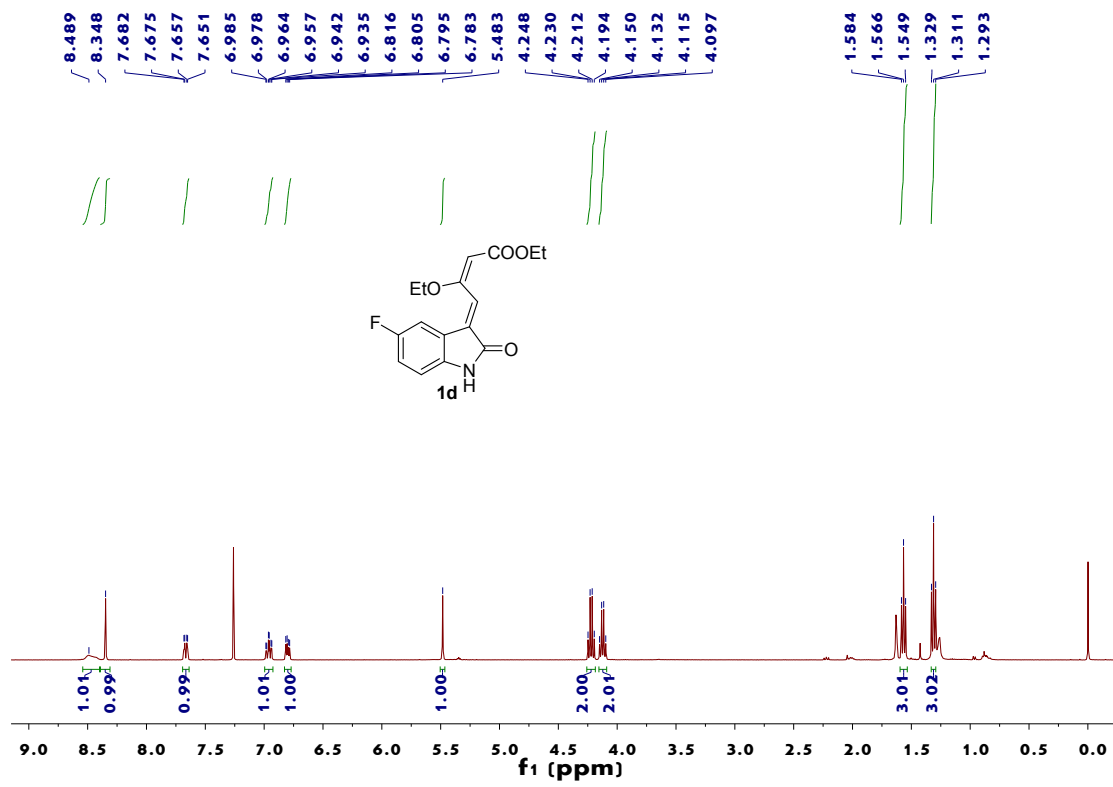

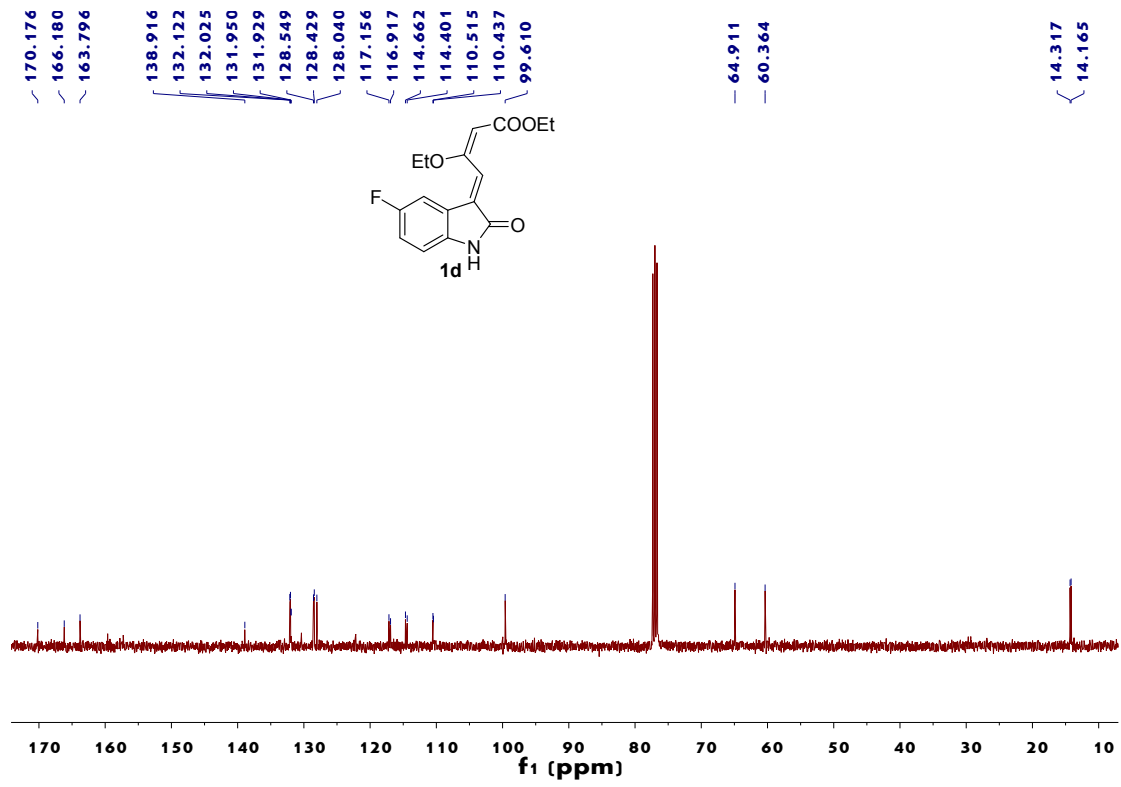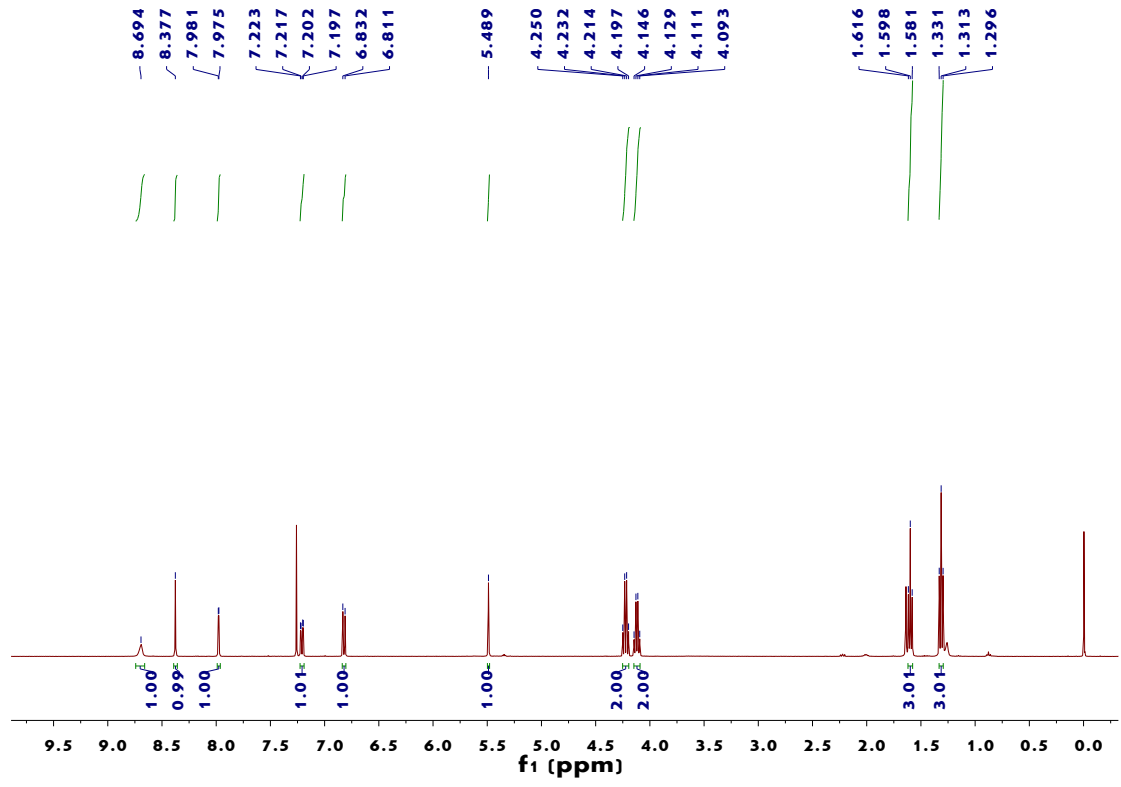

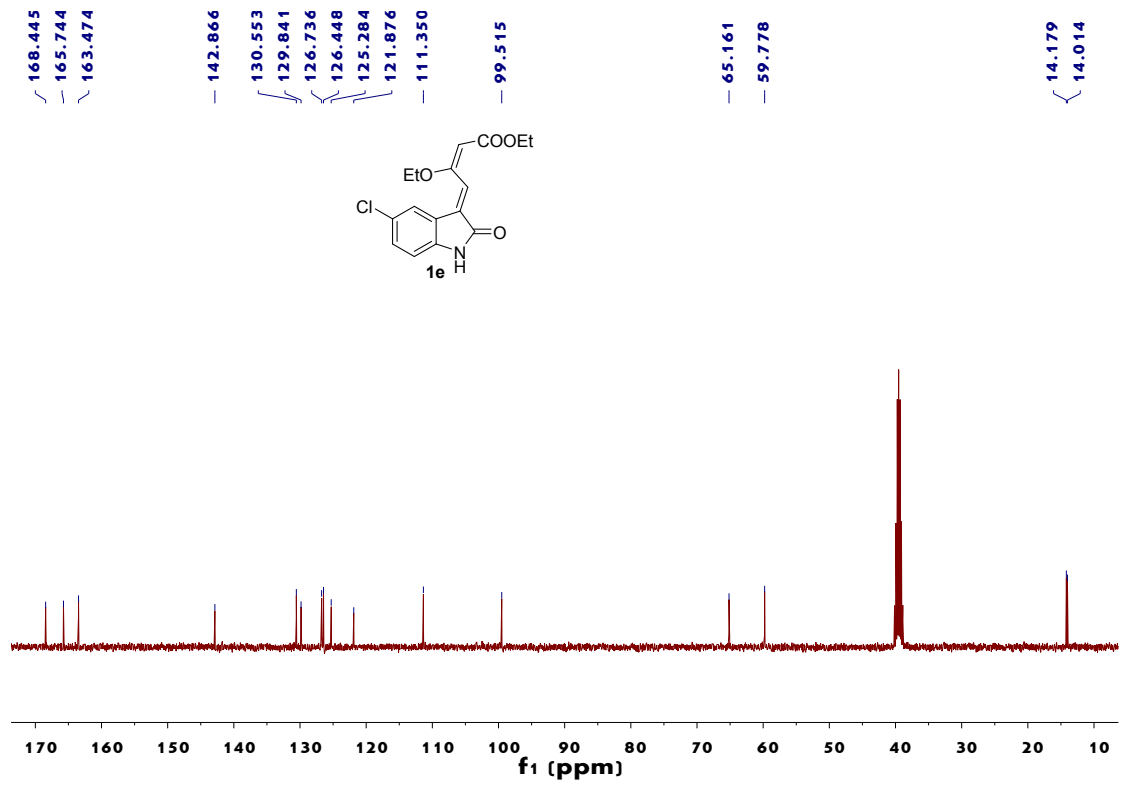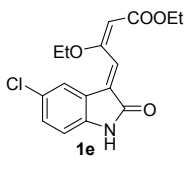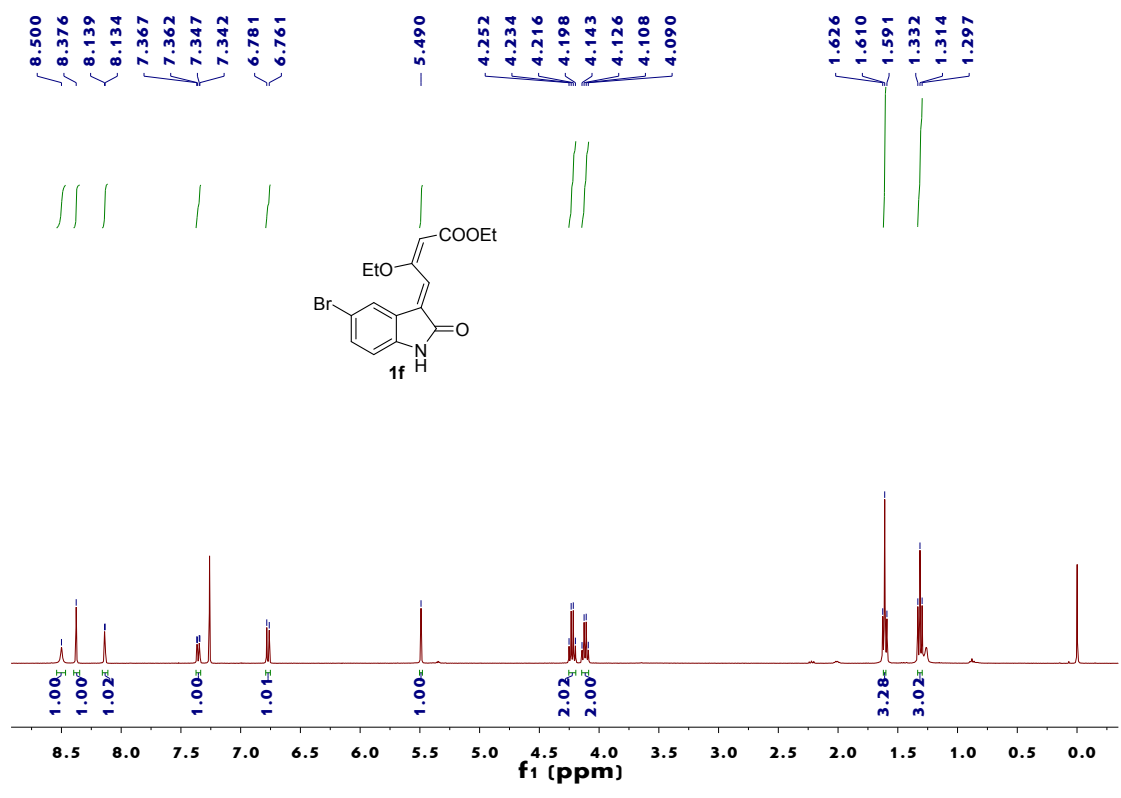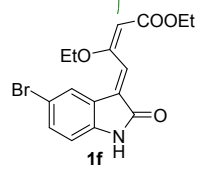

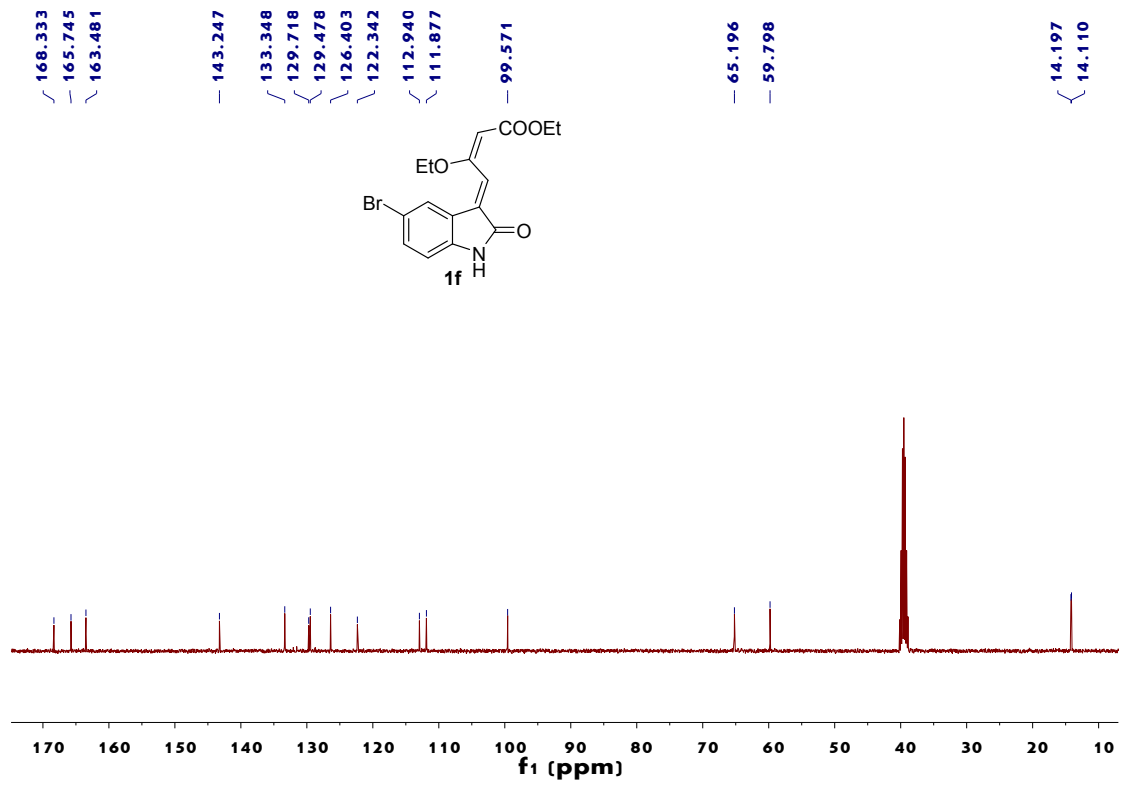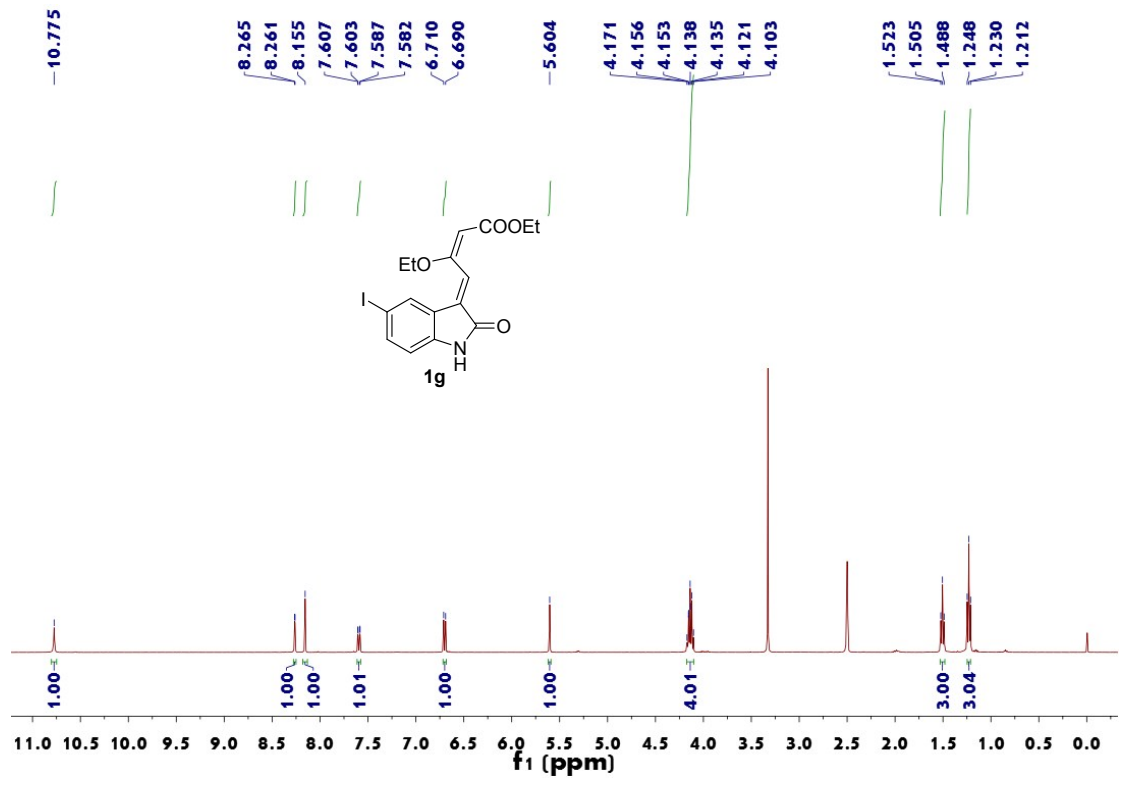

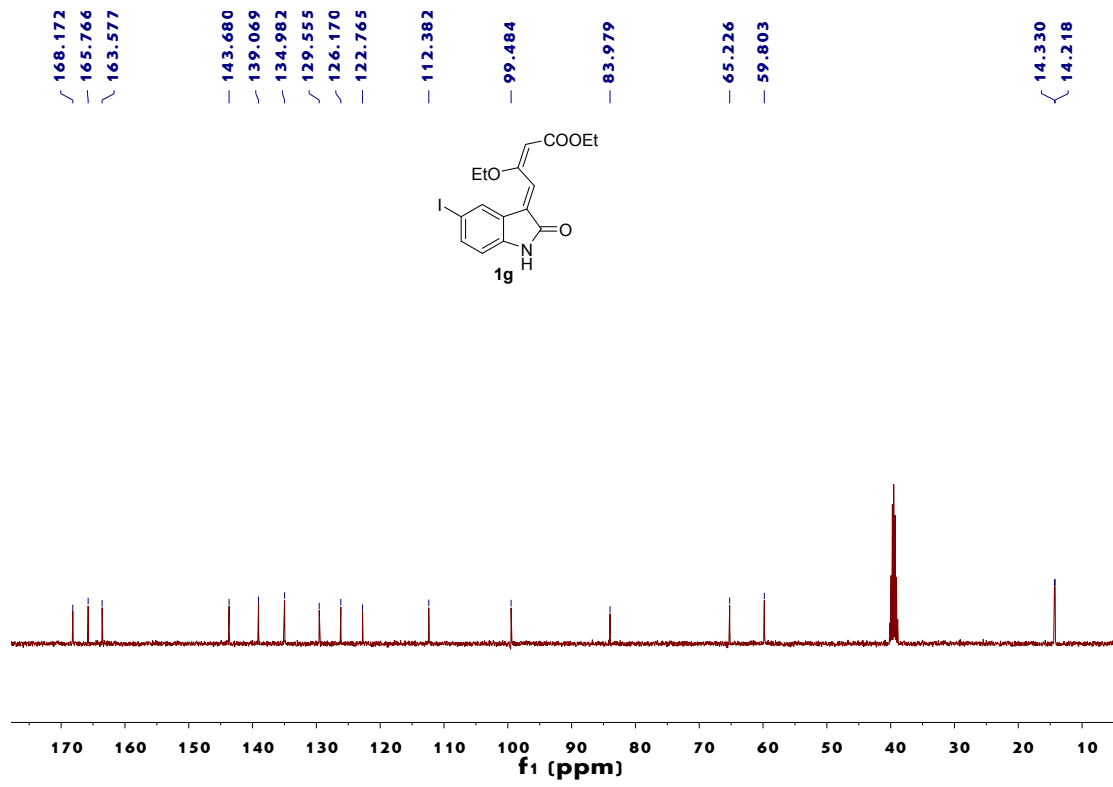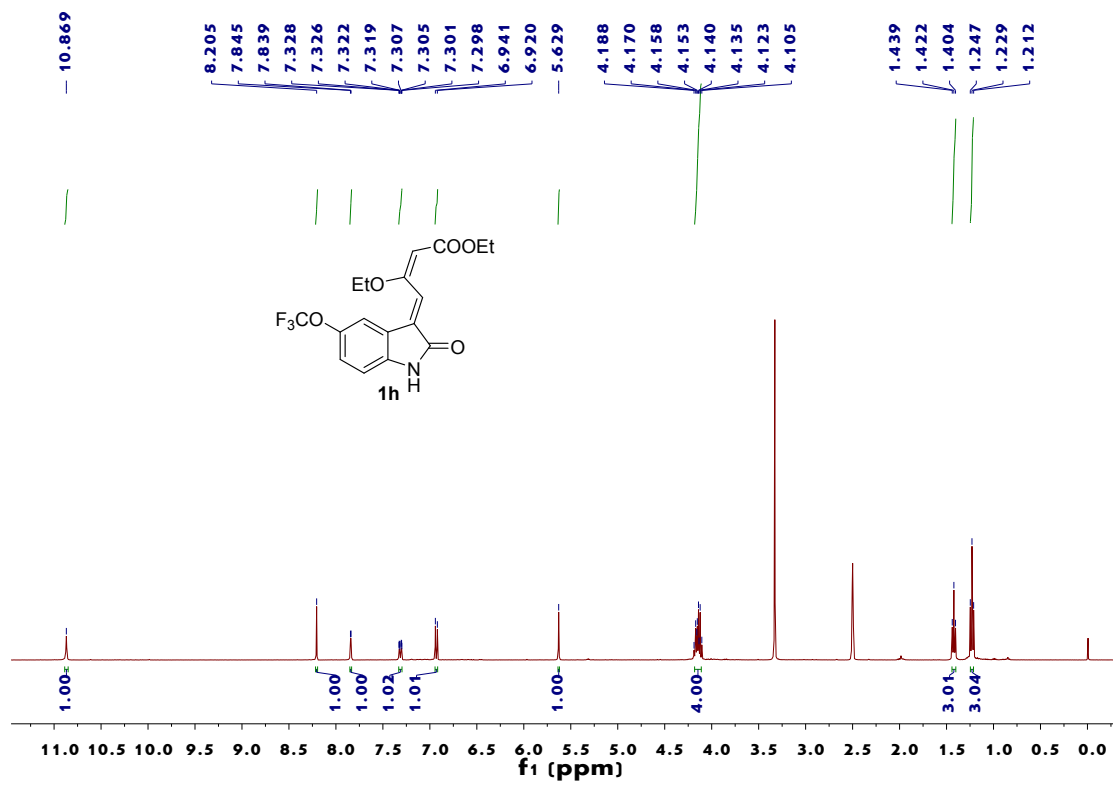

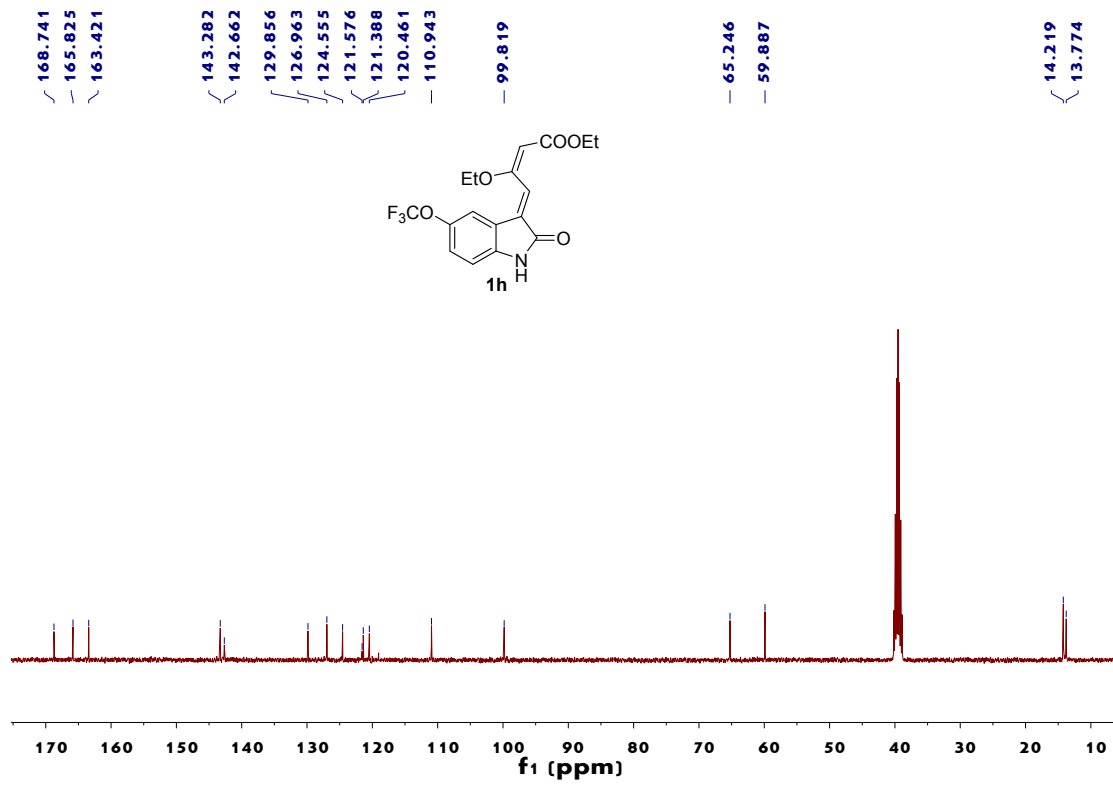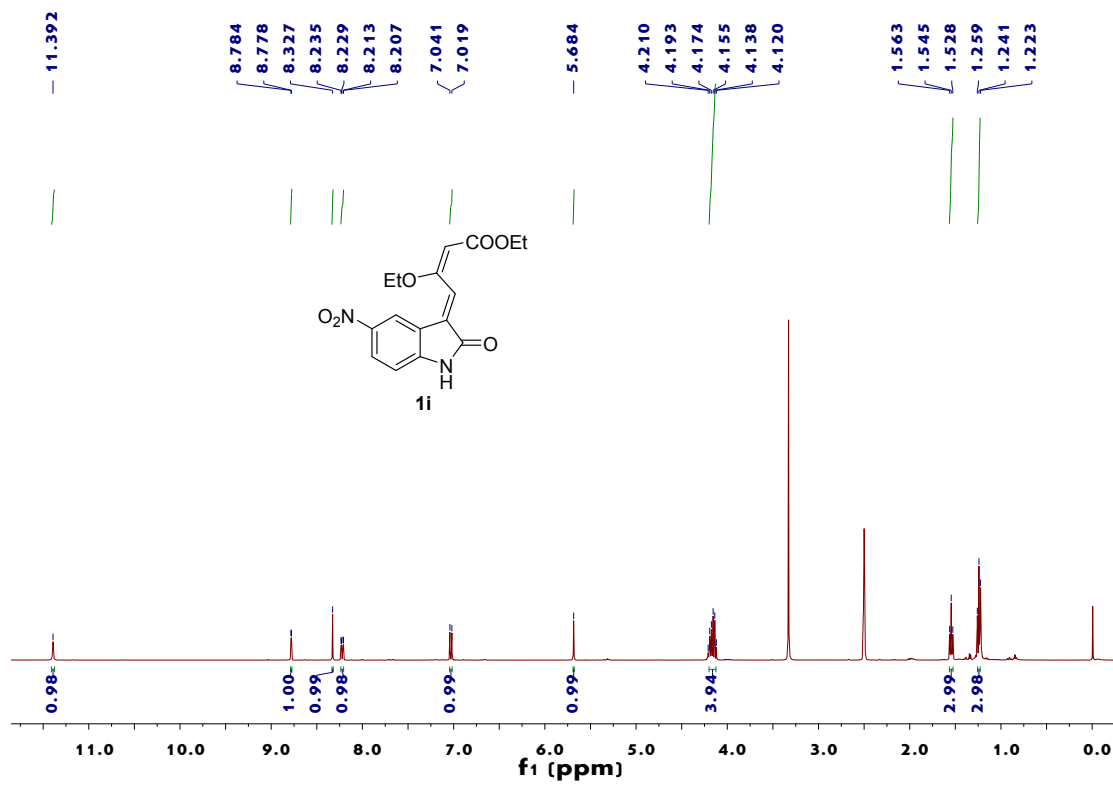

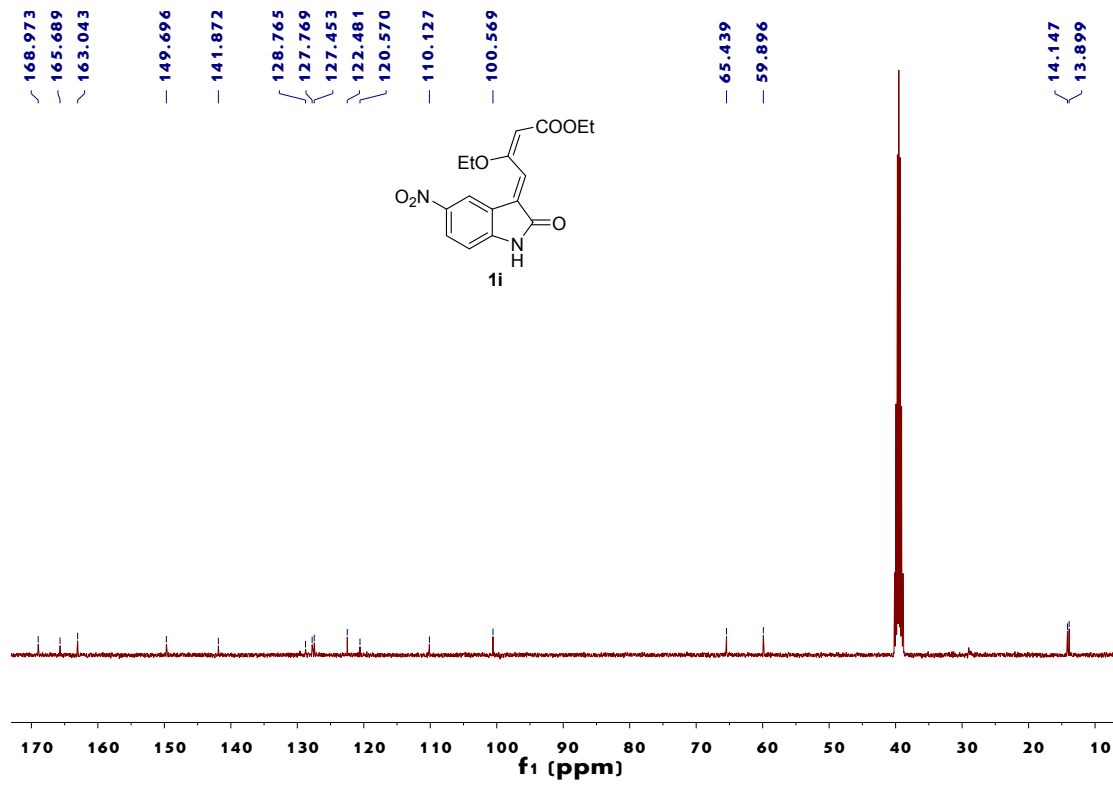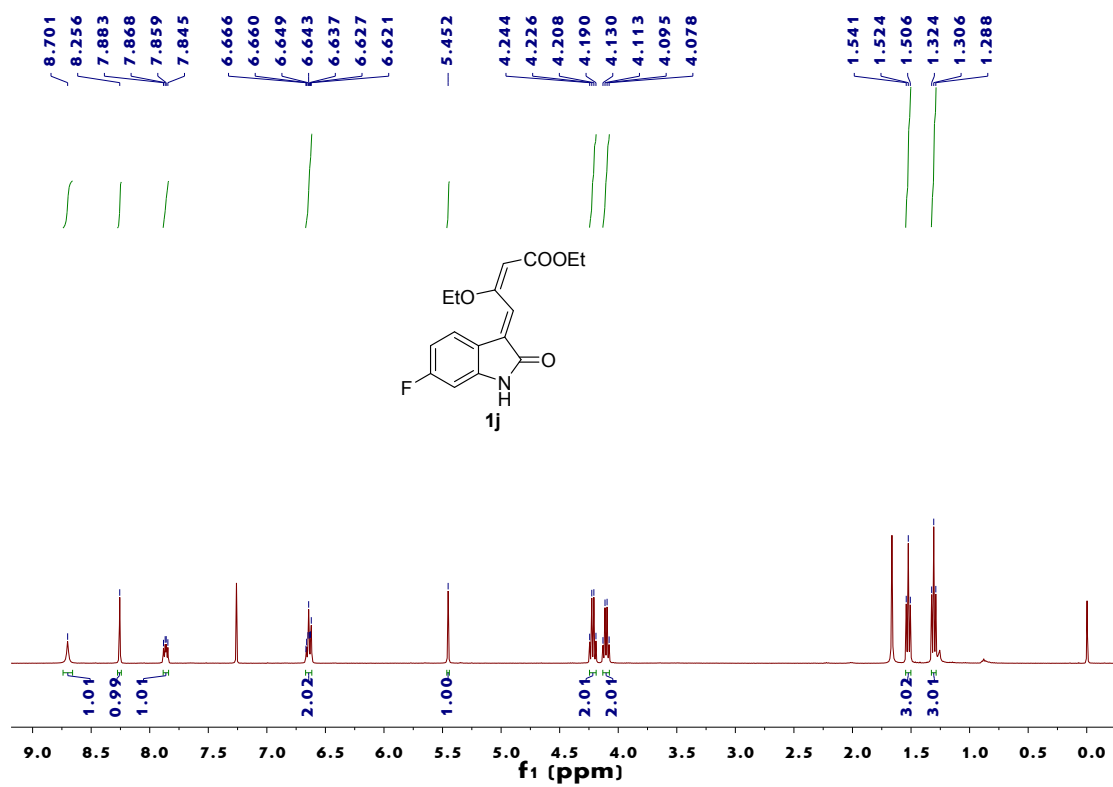



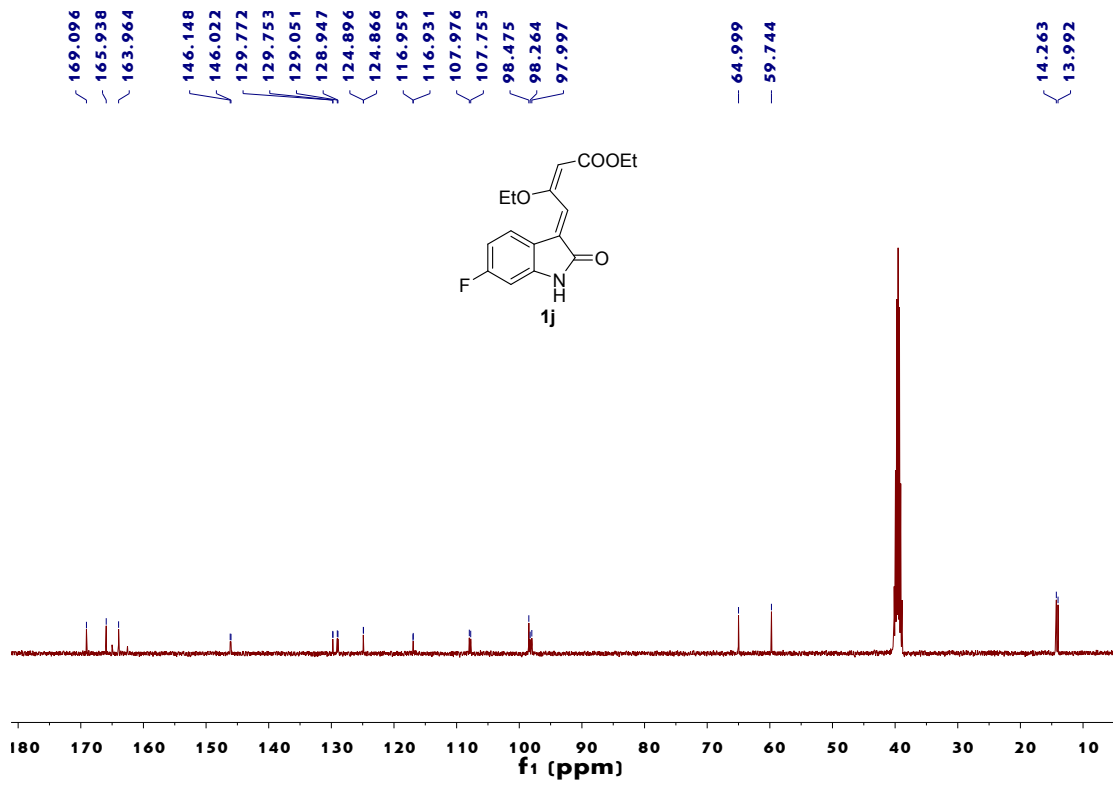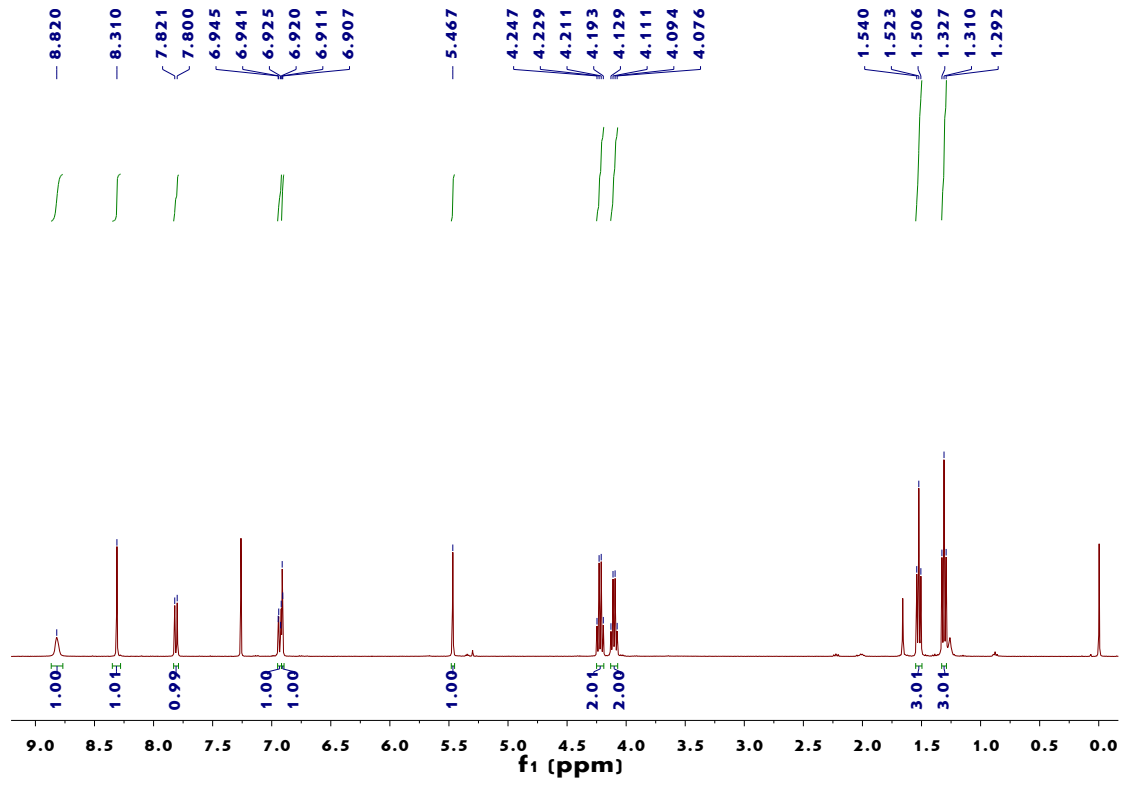

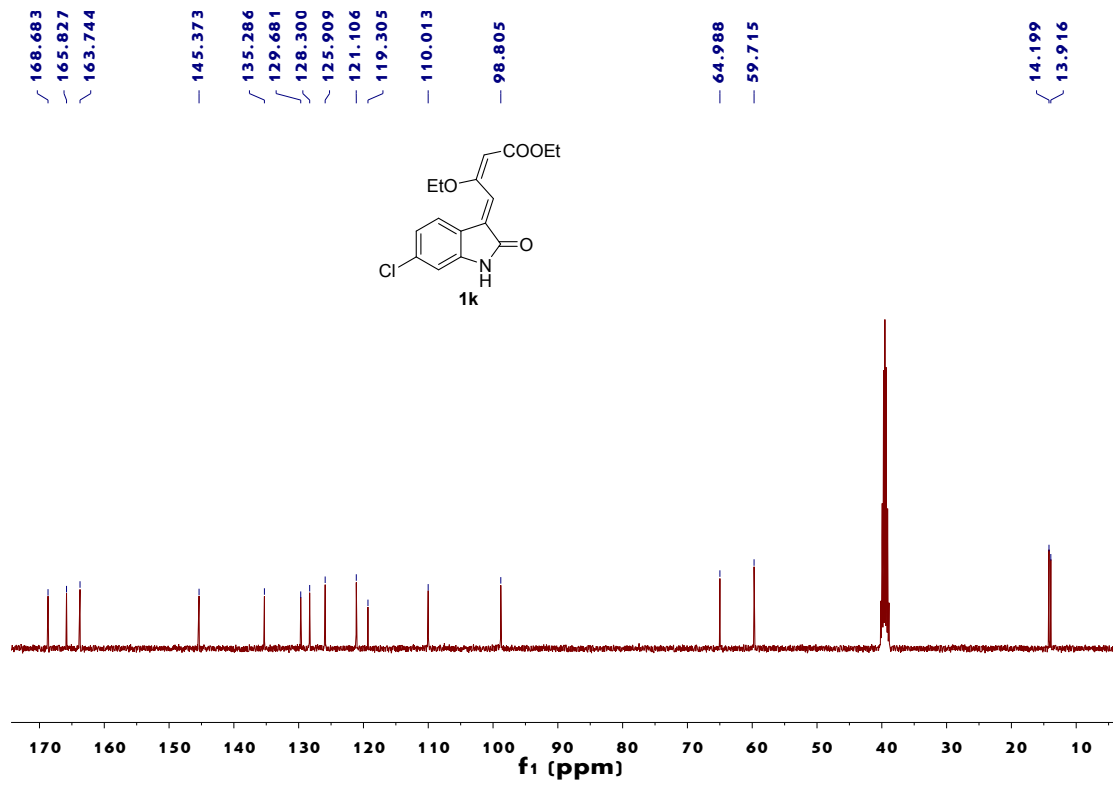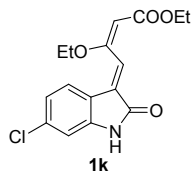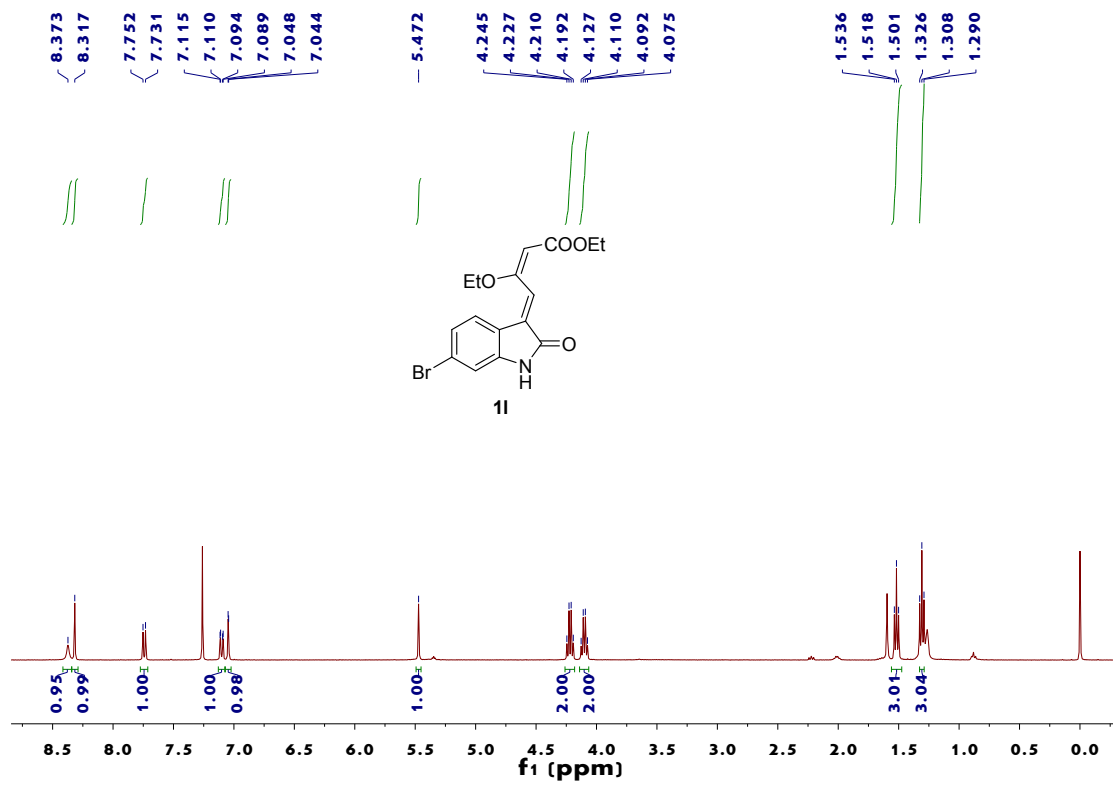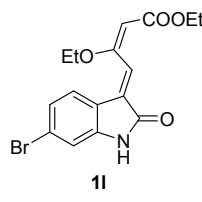

168.547  
165.819  
163.749

145.411

129.770  
128.485  
126.076  
123.999  
119.634  
112.807

98.833

64.986  
59.711

14.191  
13.903

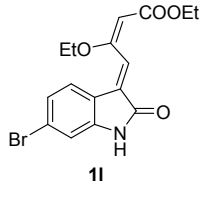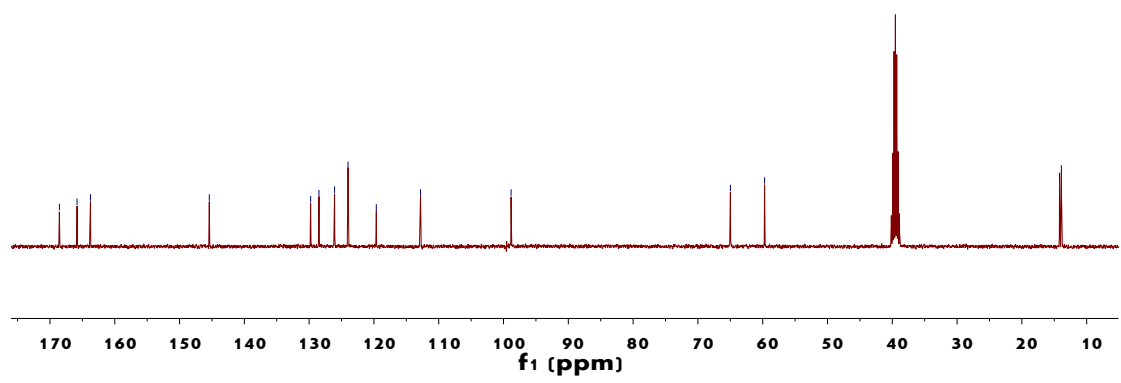

11.174

8.088  
7.683  
7.664  
7.237  
7.235  
7.217  
7.214  
7.210  
7.191  
7.189  
7.003  
6.990  
6.983  
6.970  
6.963  
6.950  
5.589

4.180  
4.163  
4.145  
4.127  
4.110  
4.092

1.422  
1.404  
1.387  
1.239  
1.222  
1.204

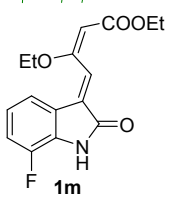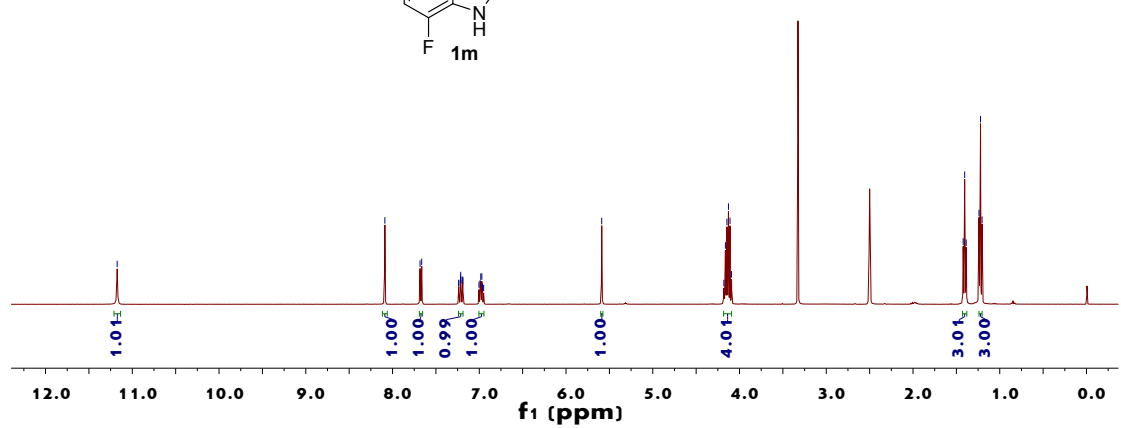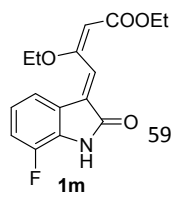

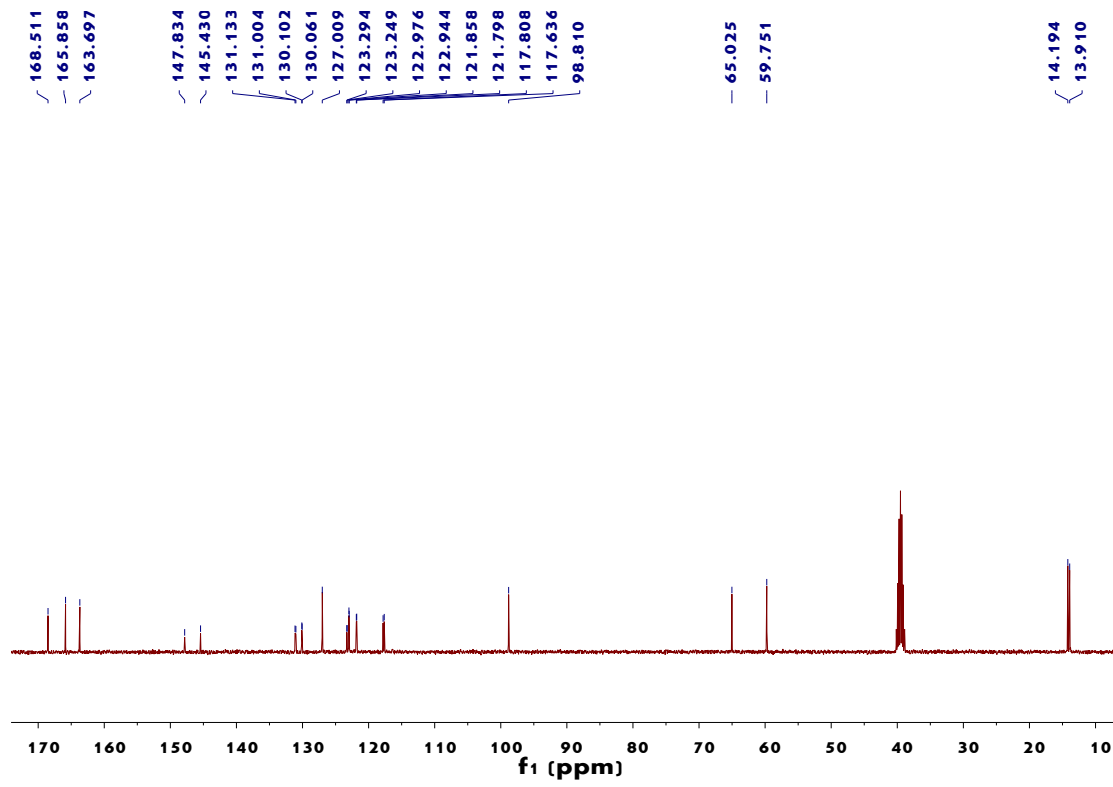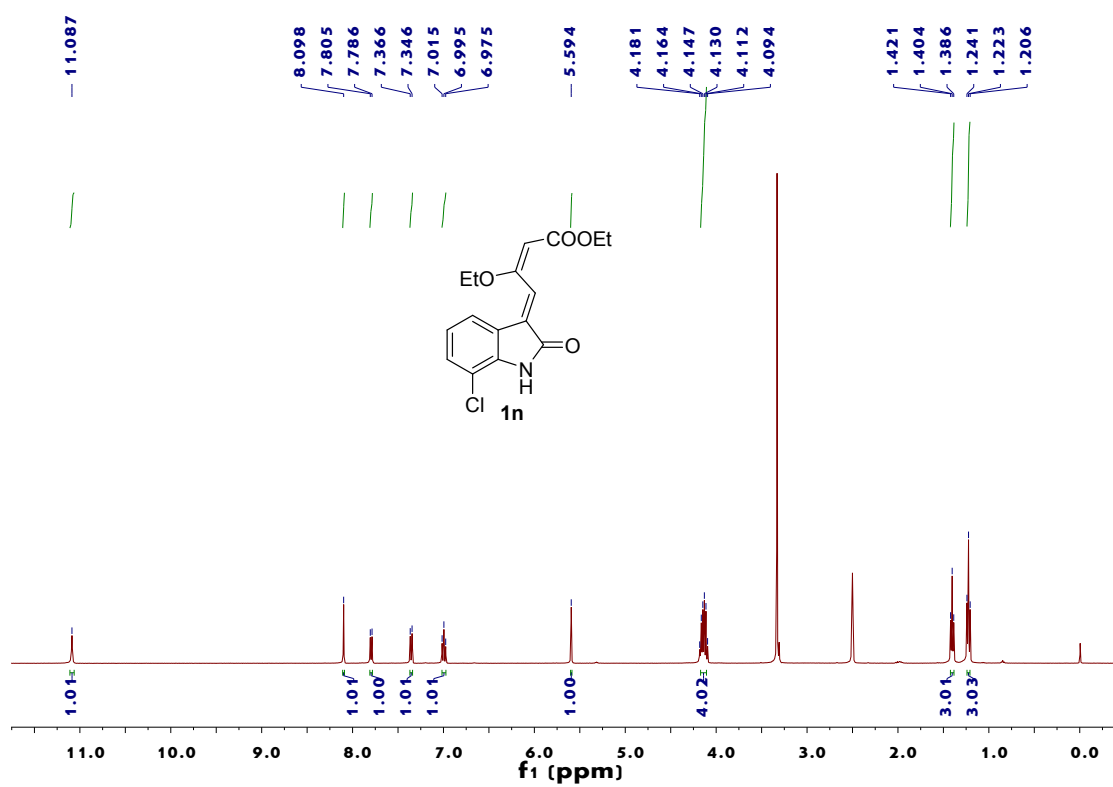

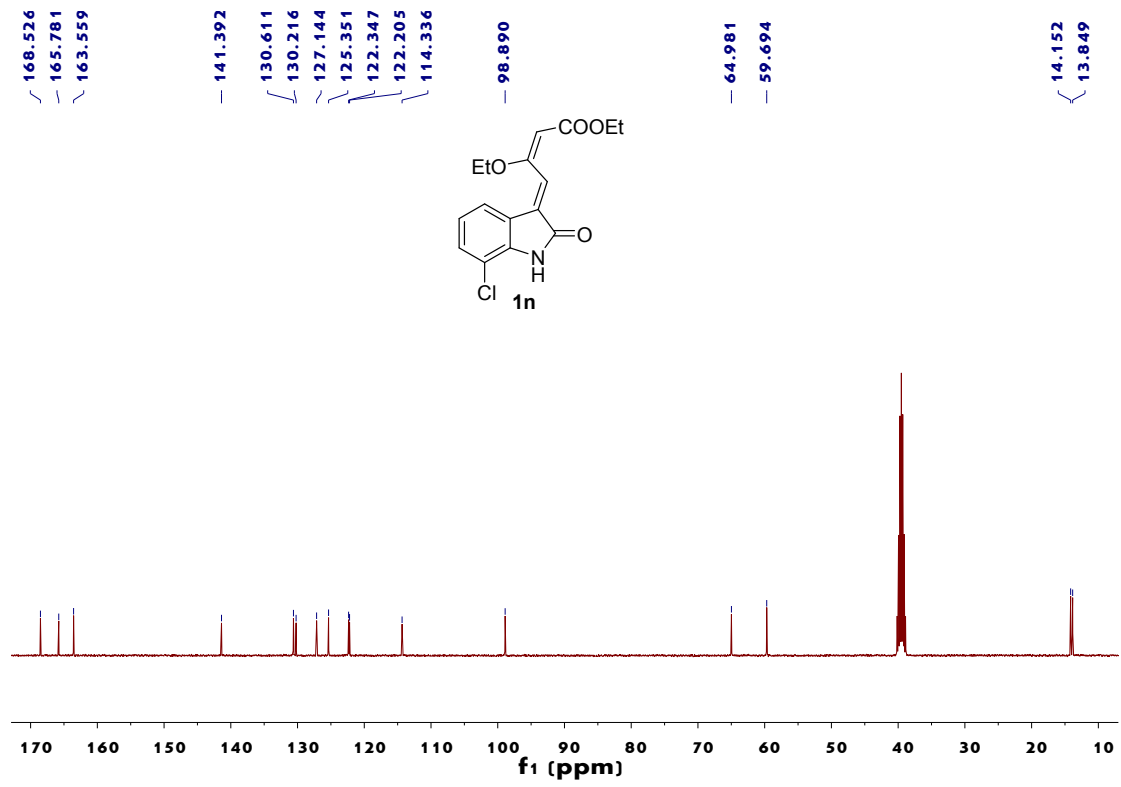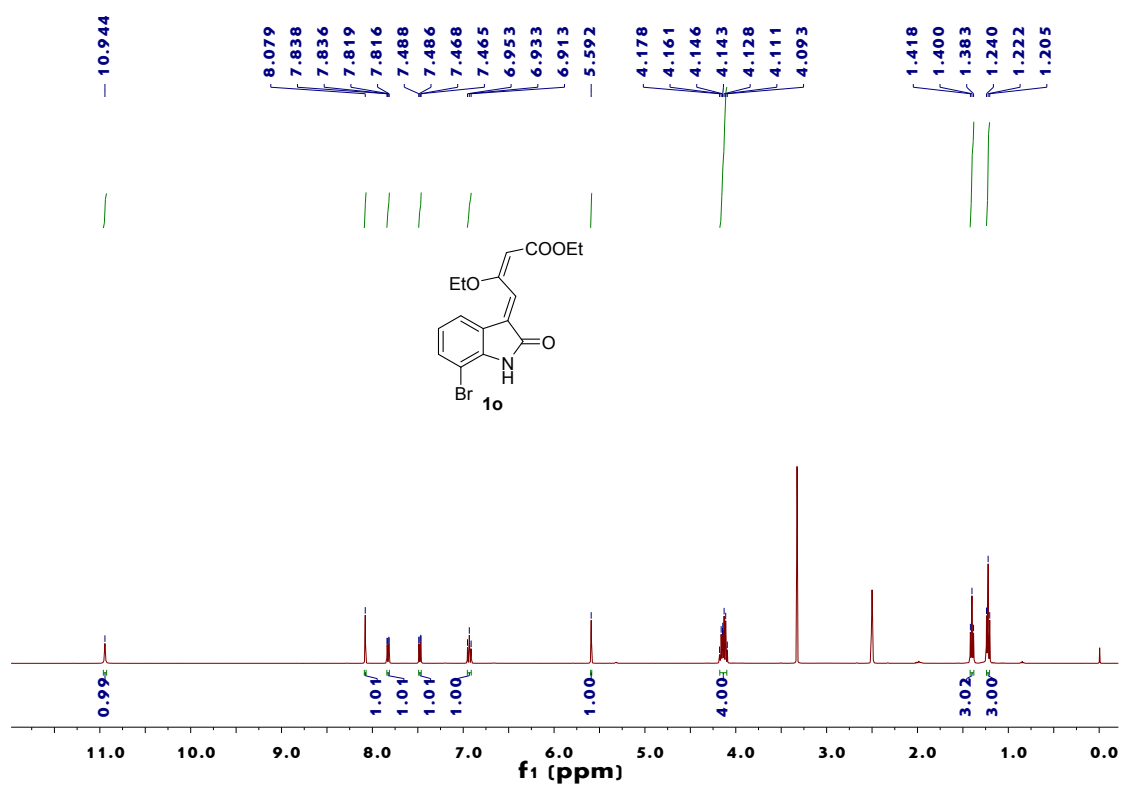

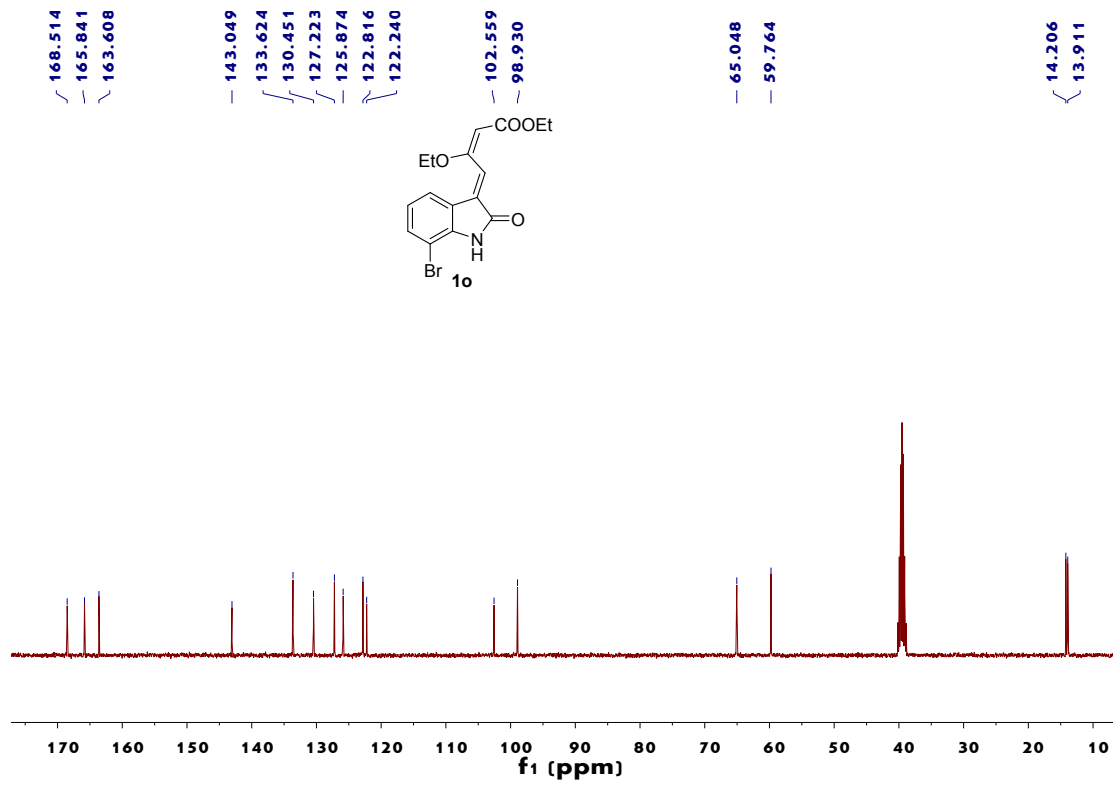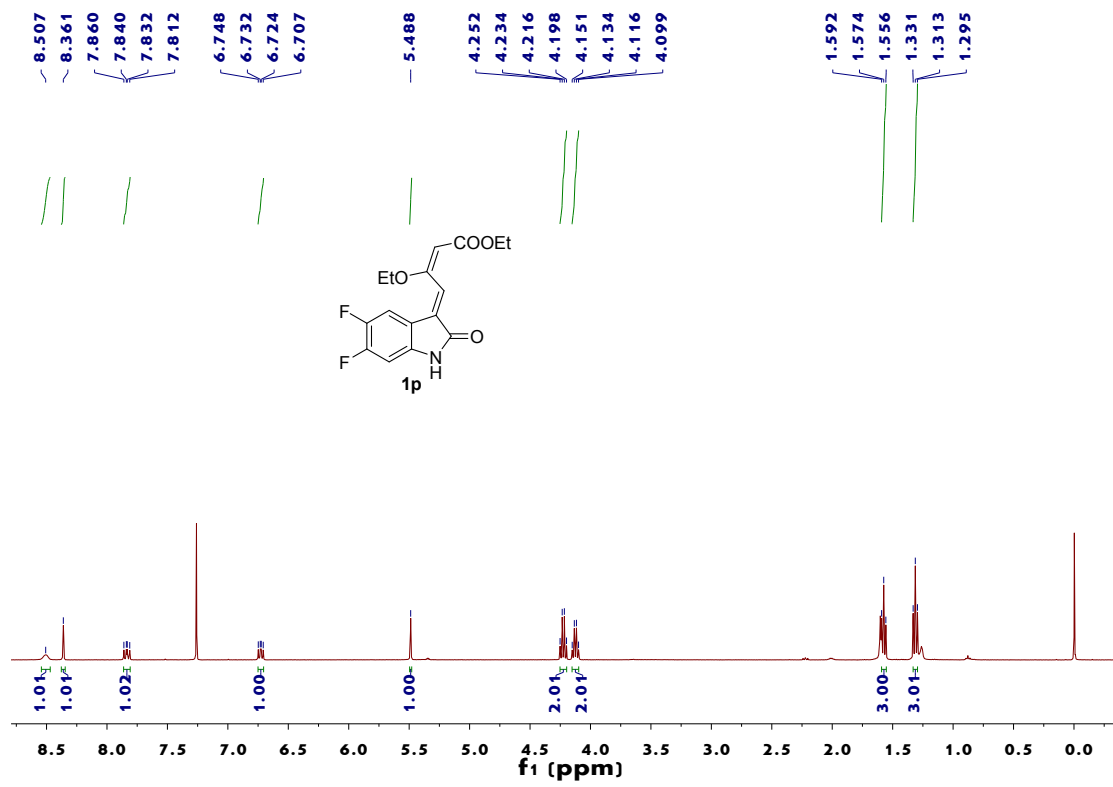

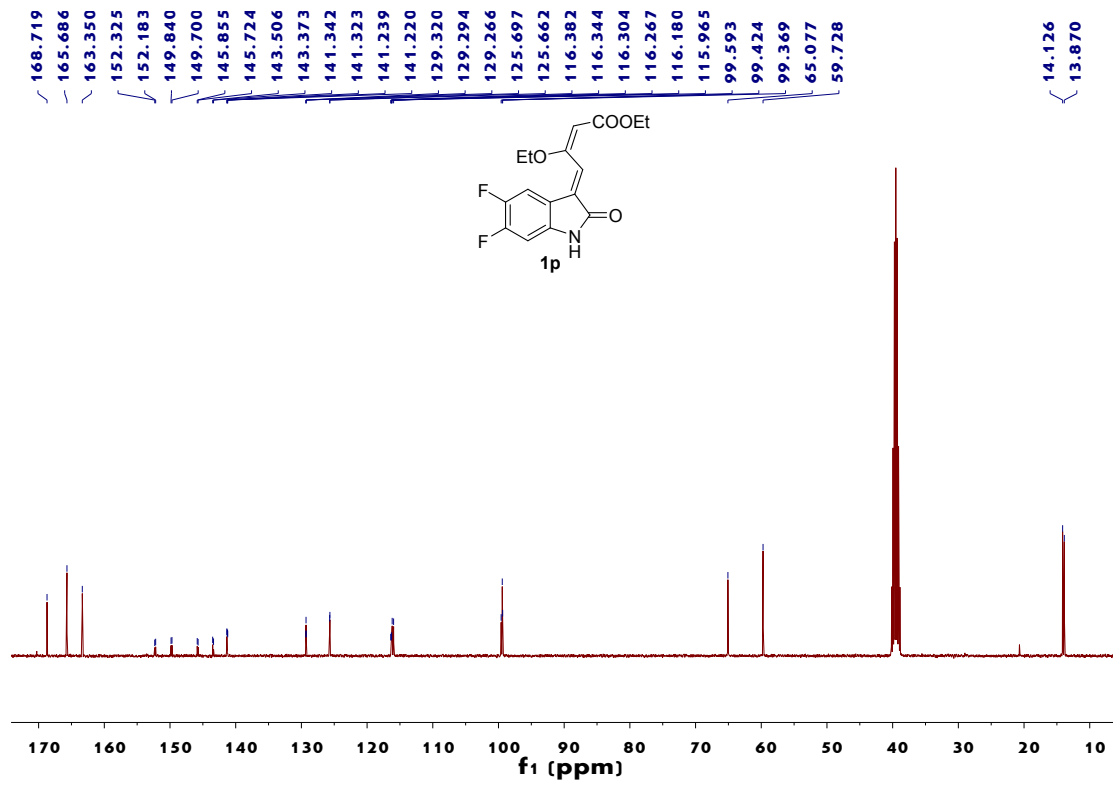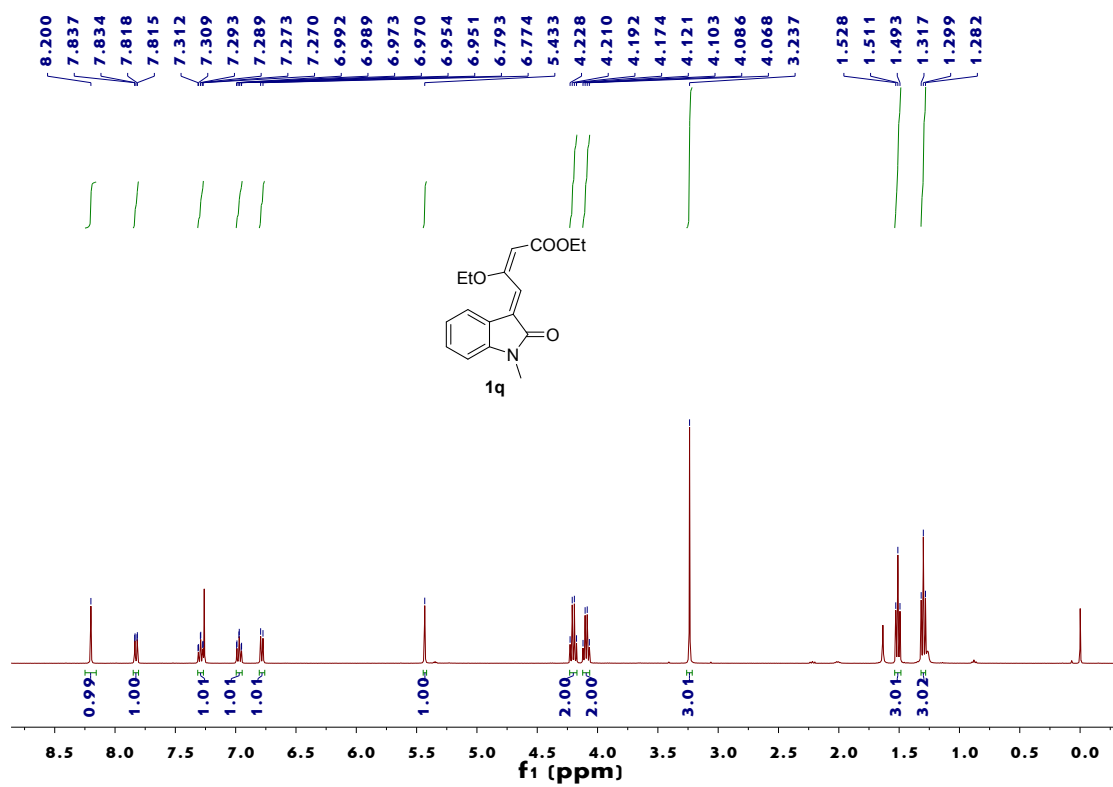

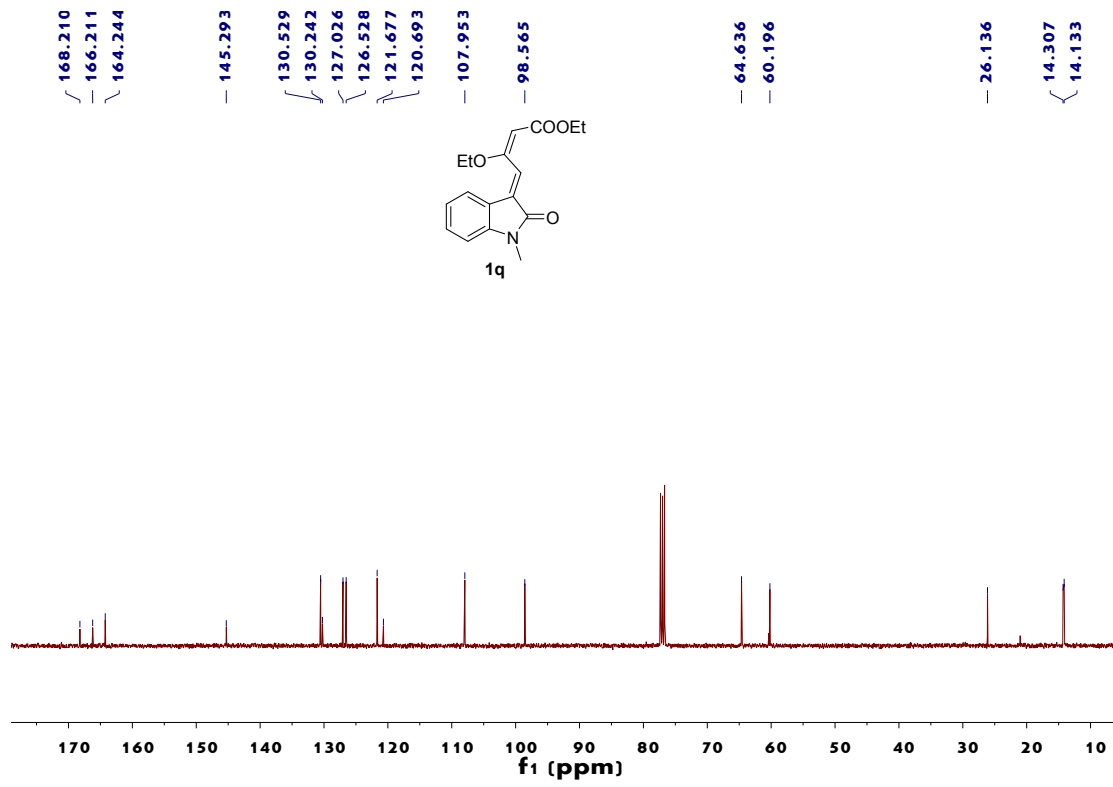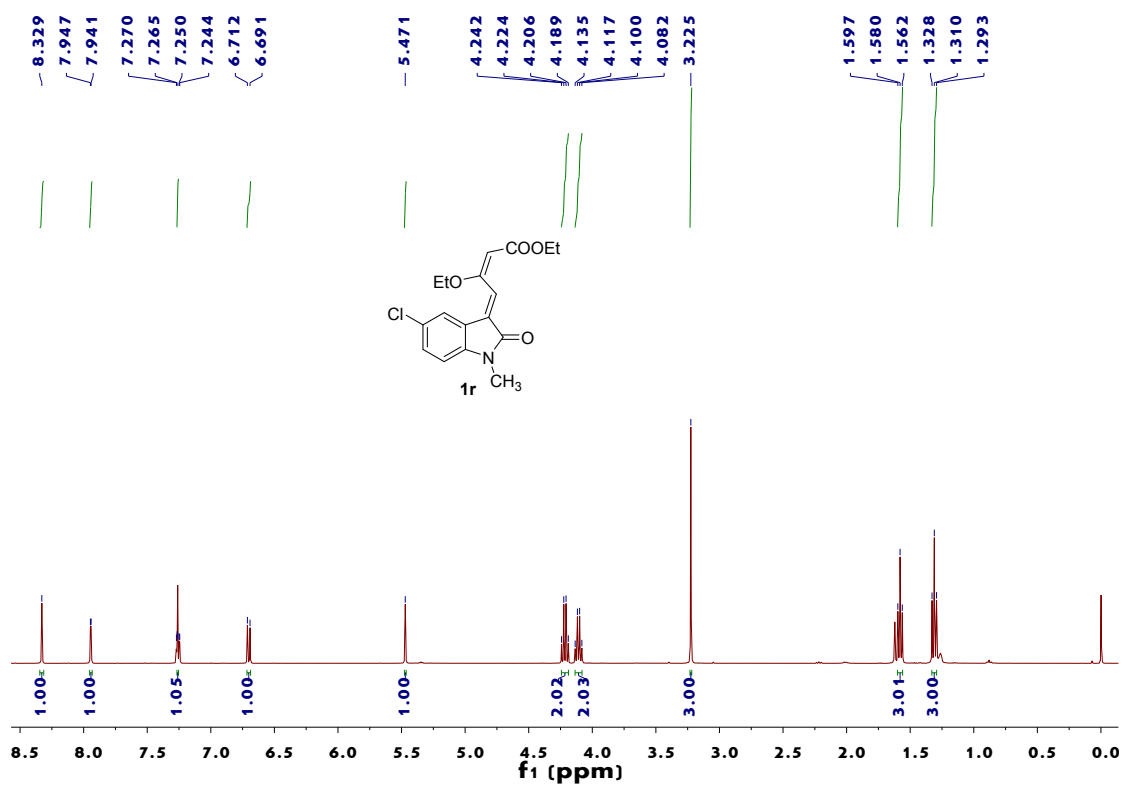



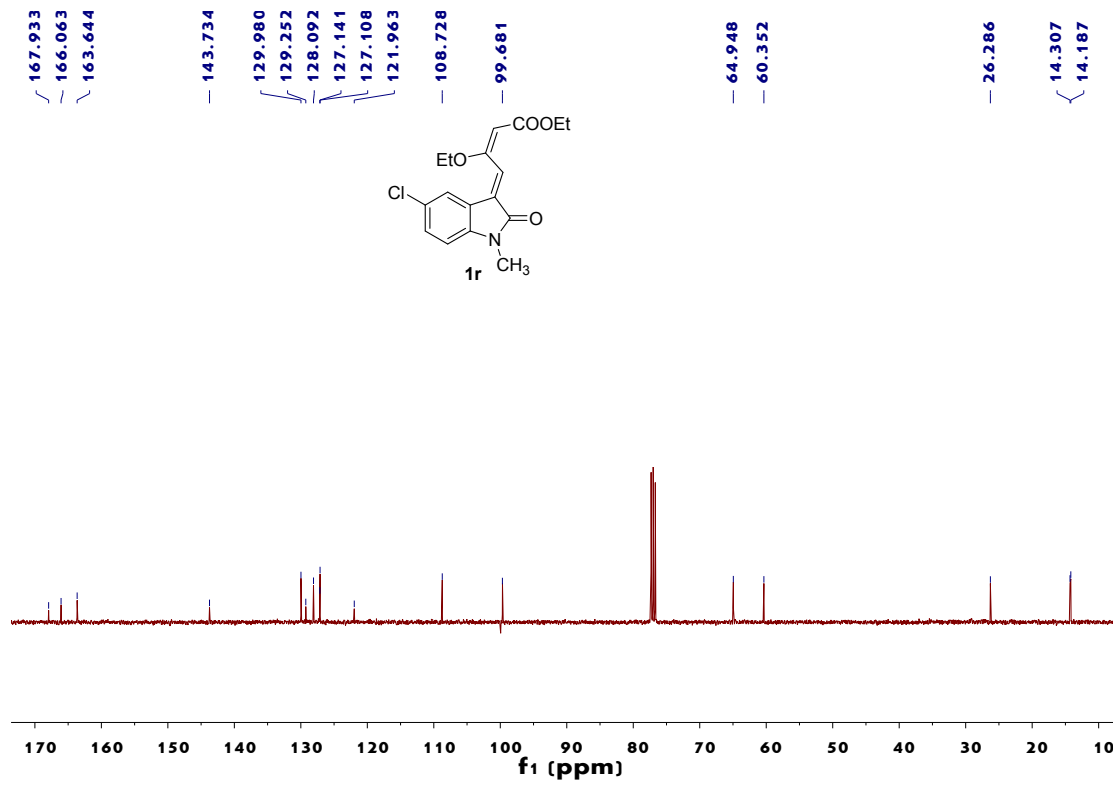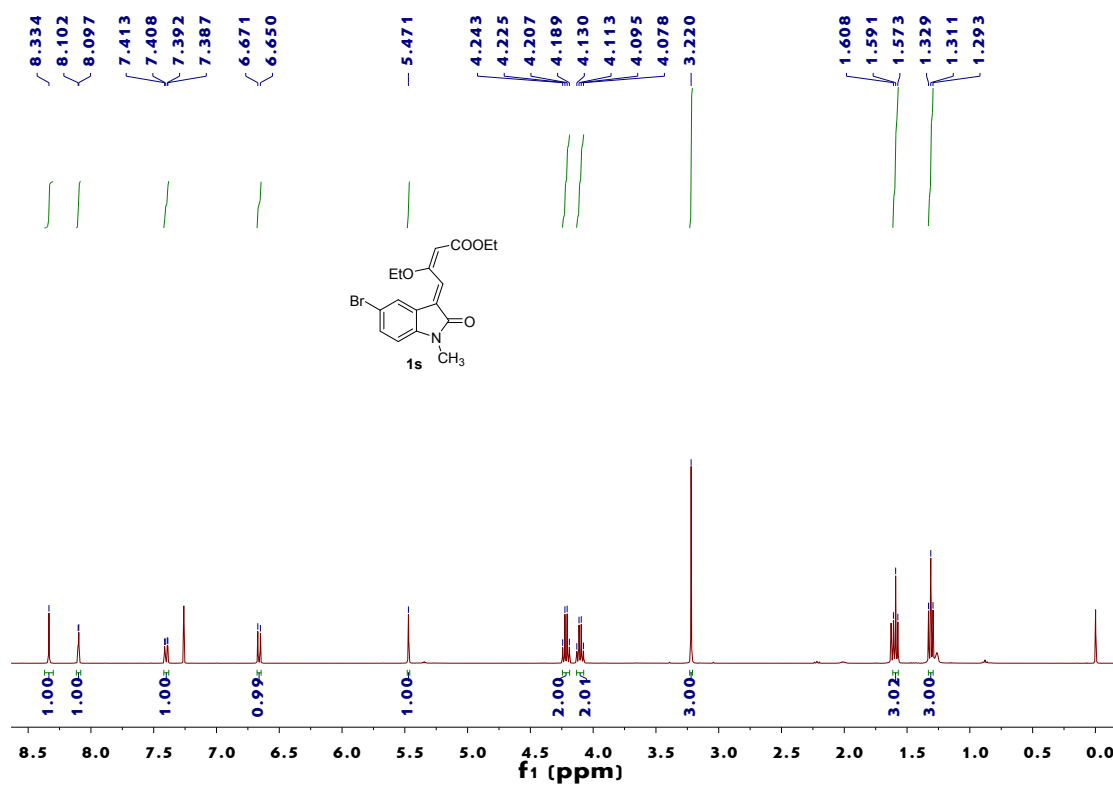

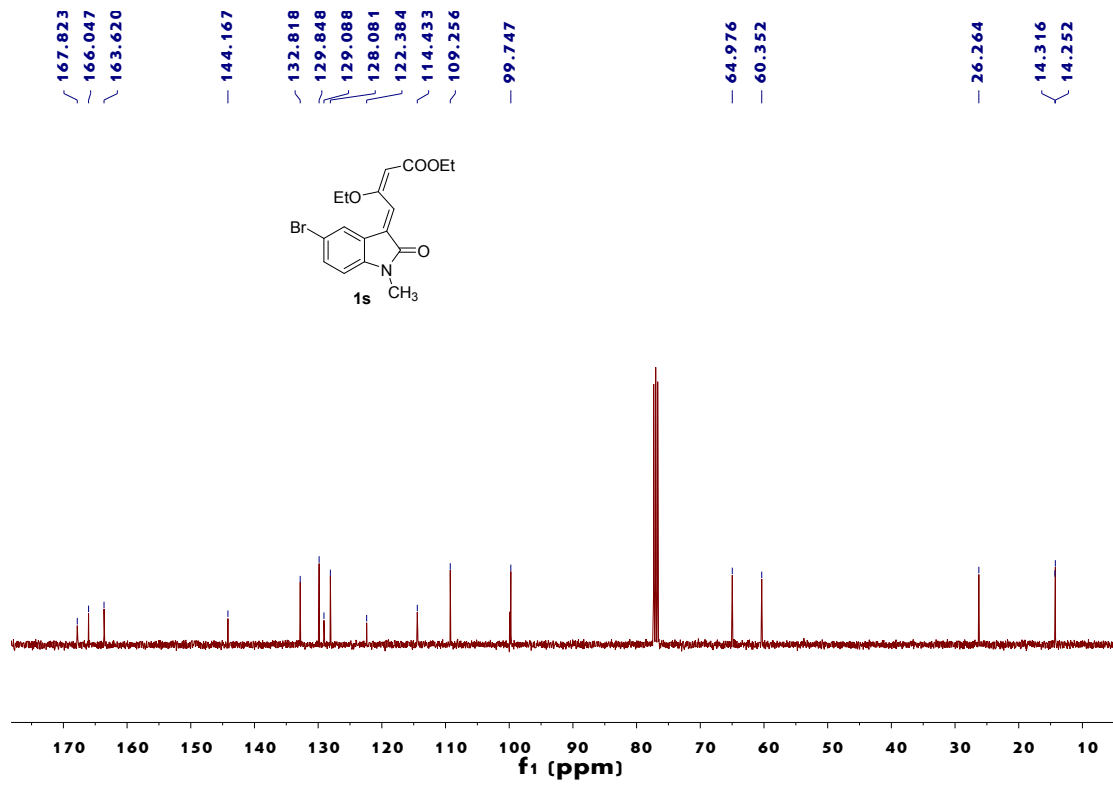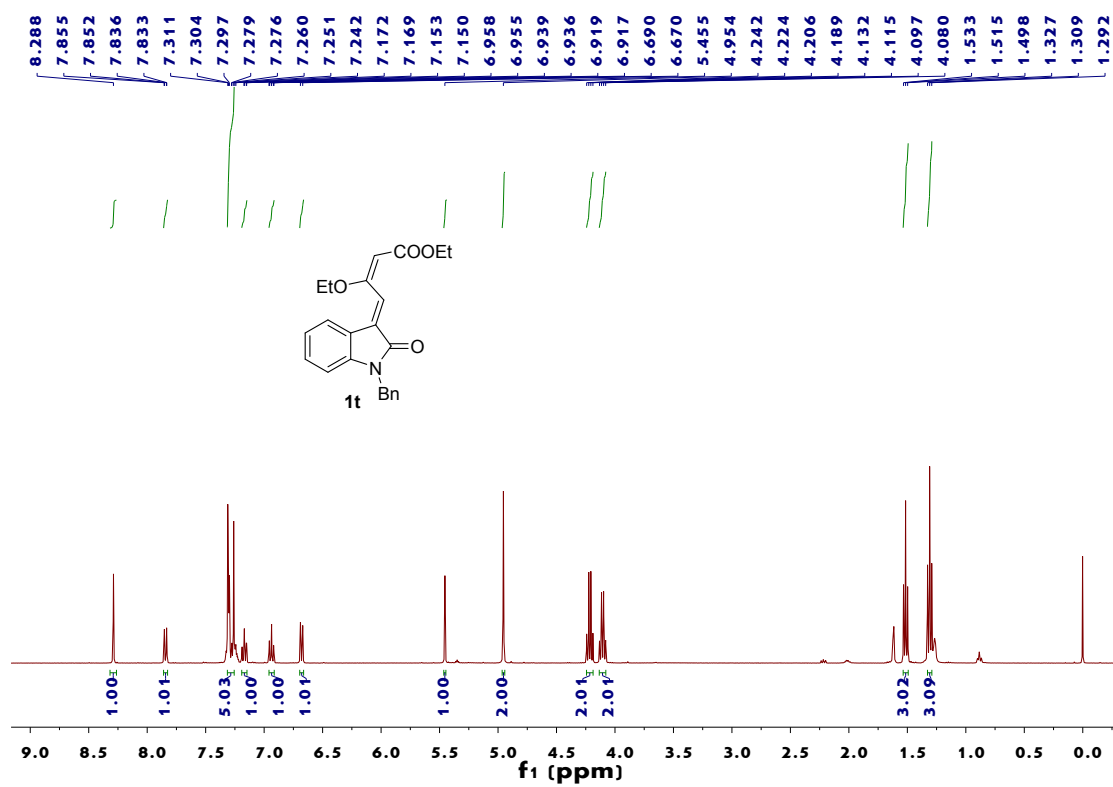

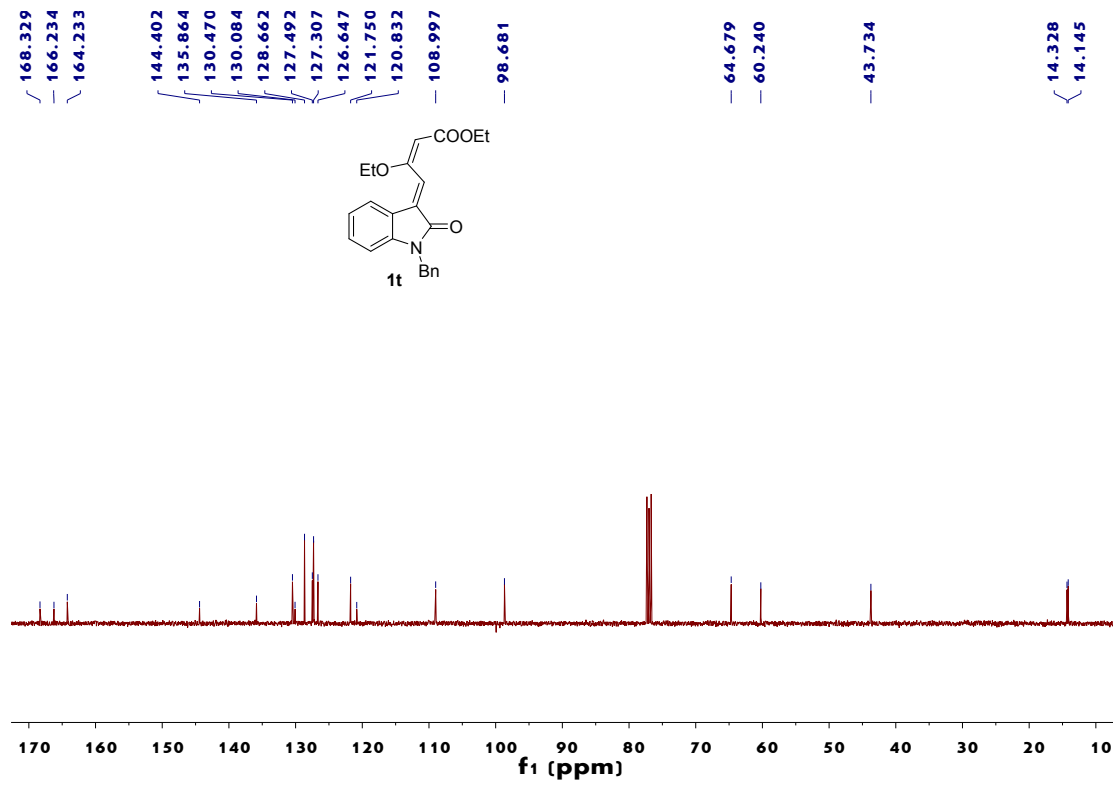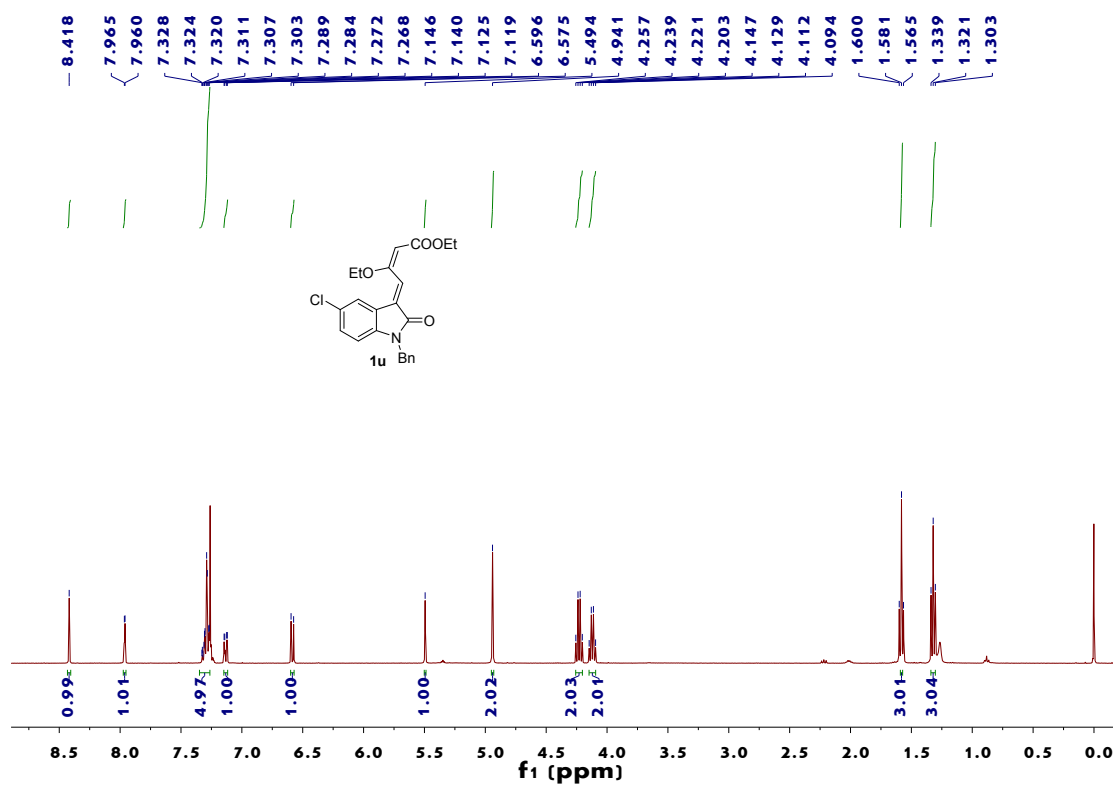

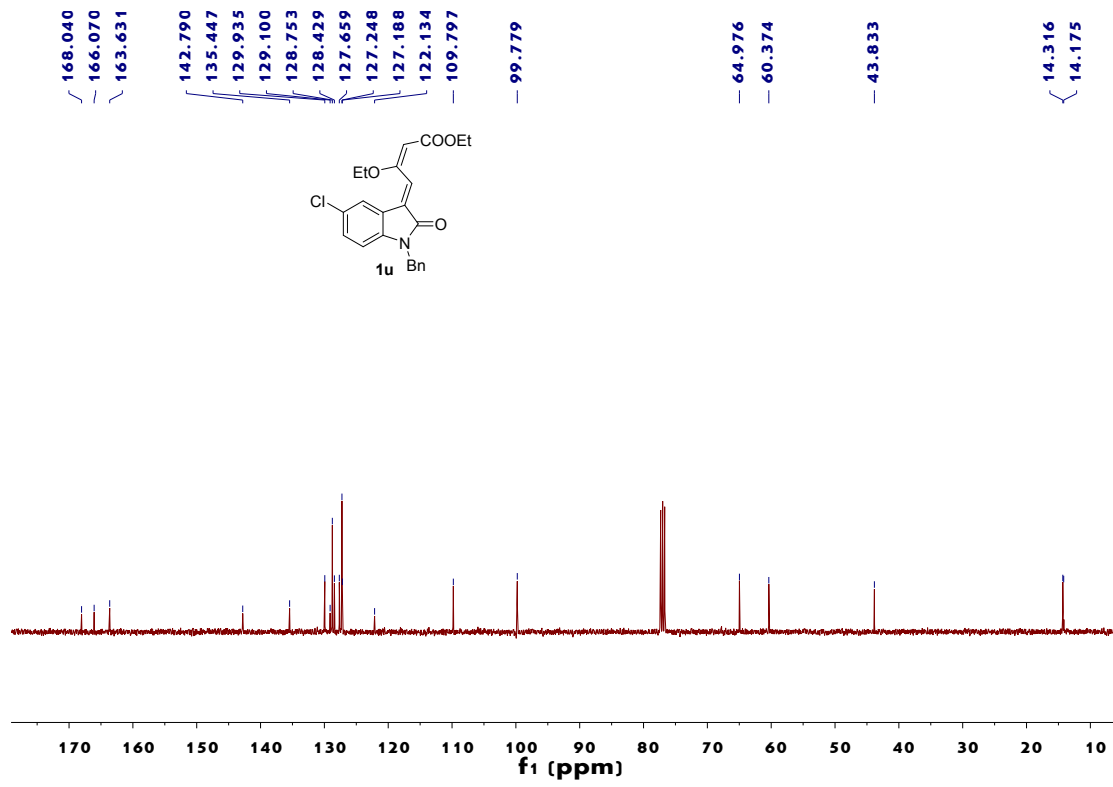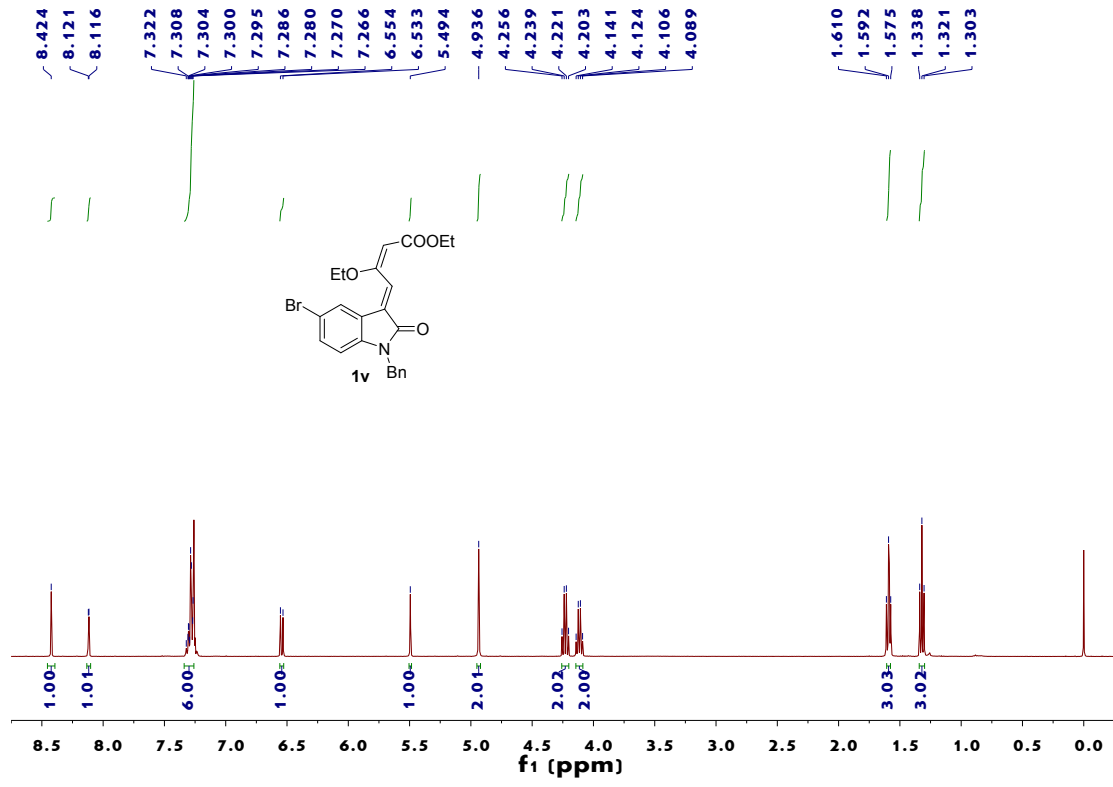

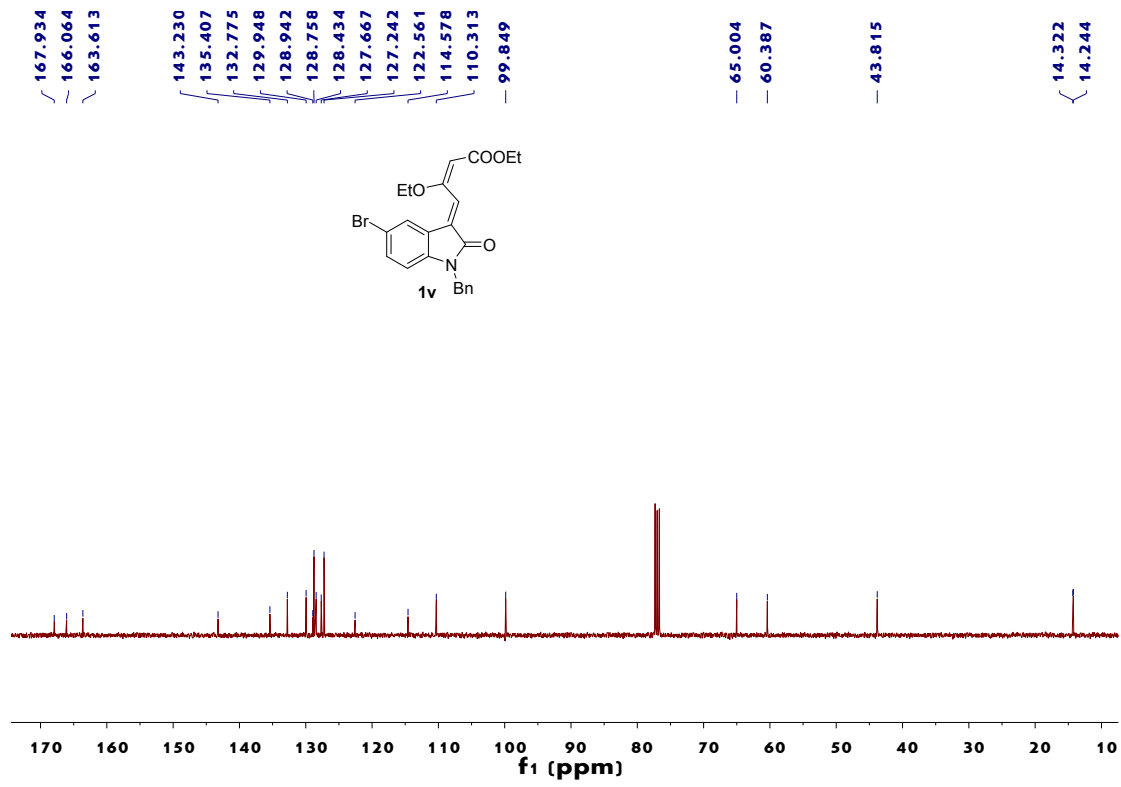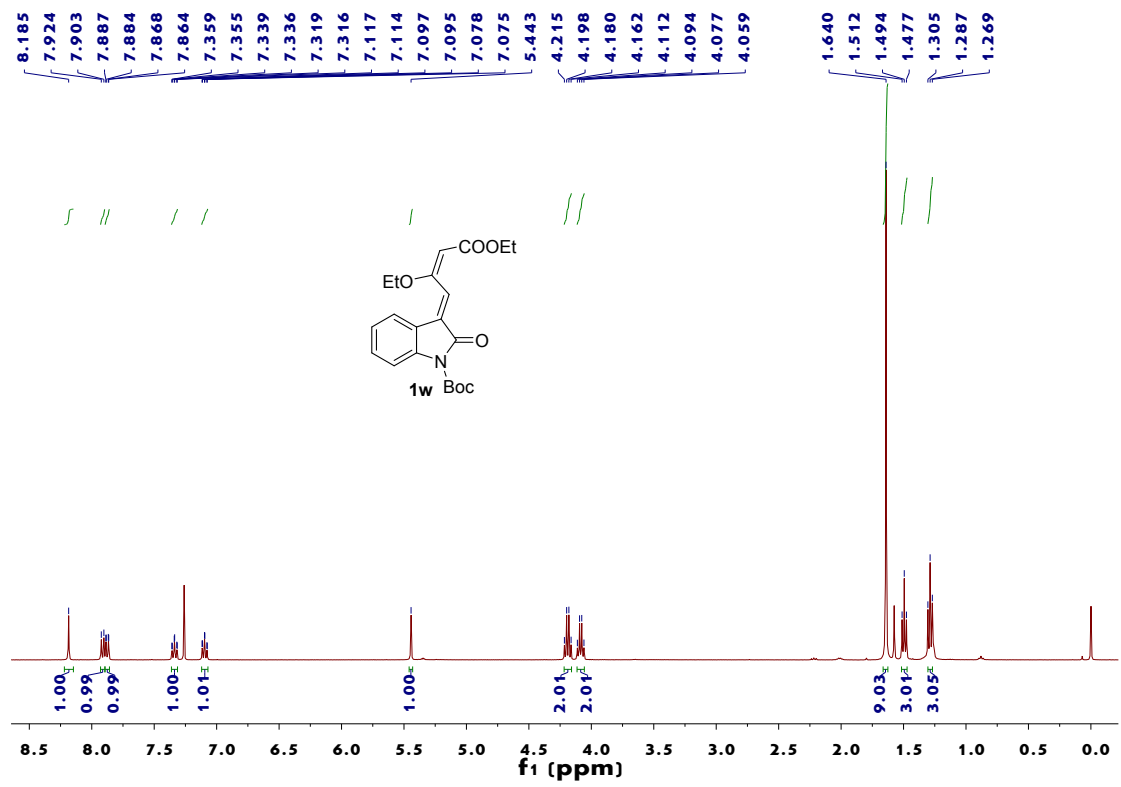

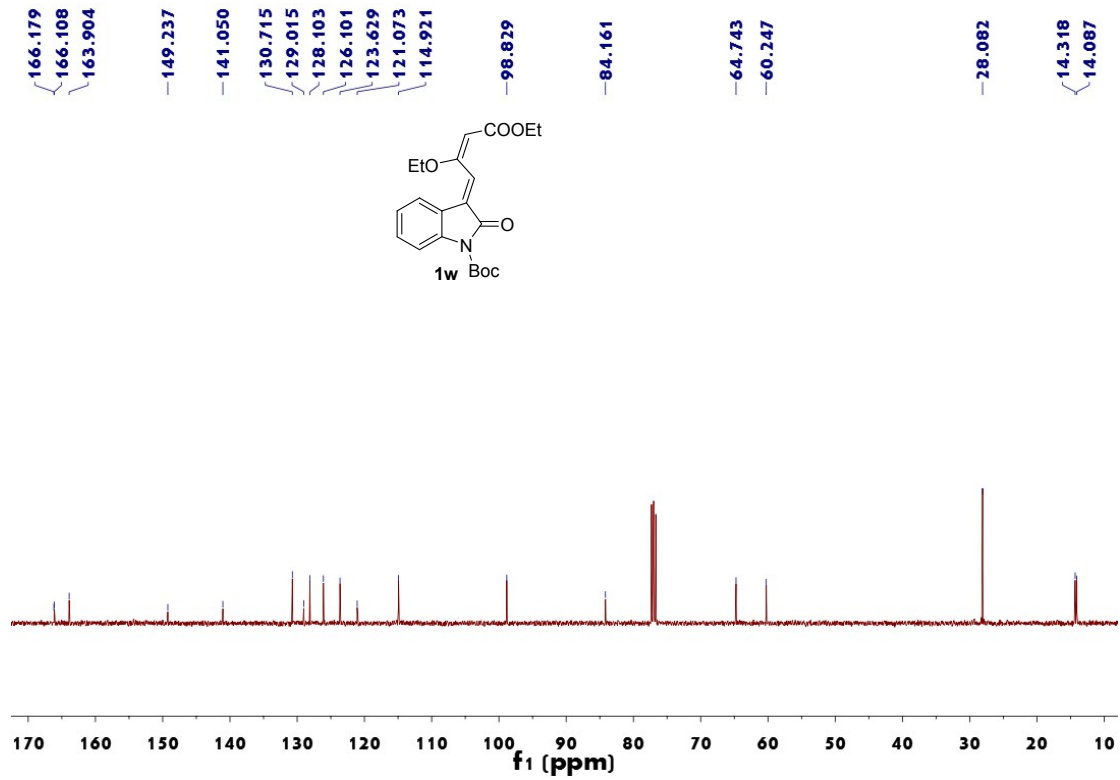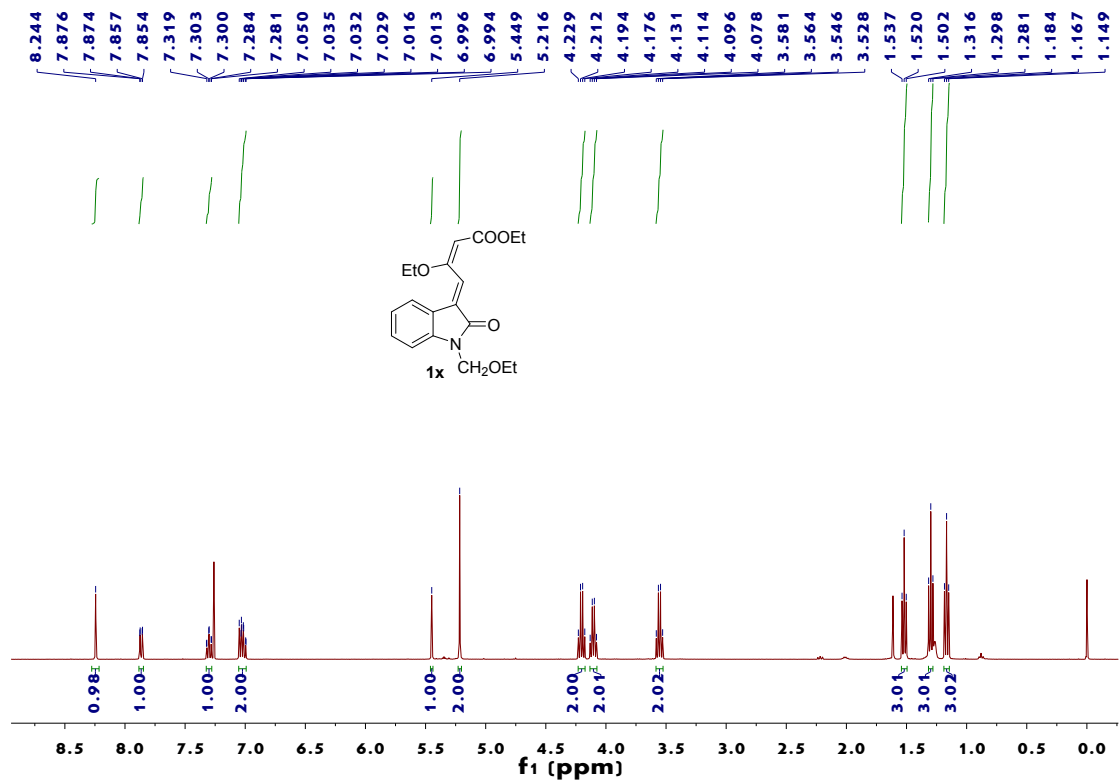

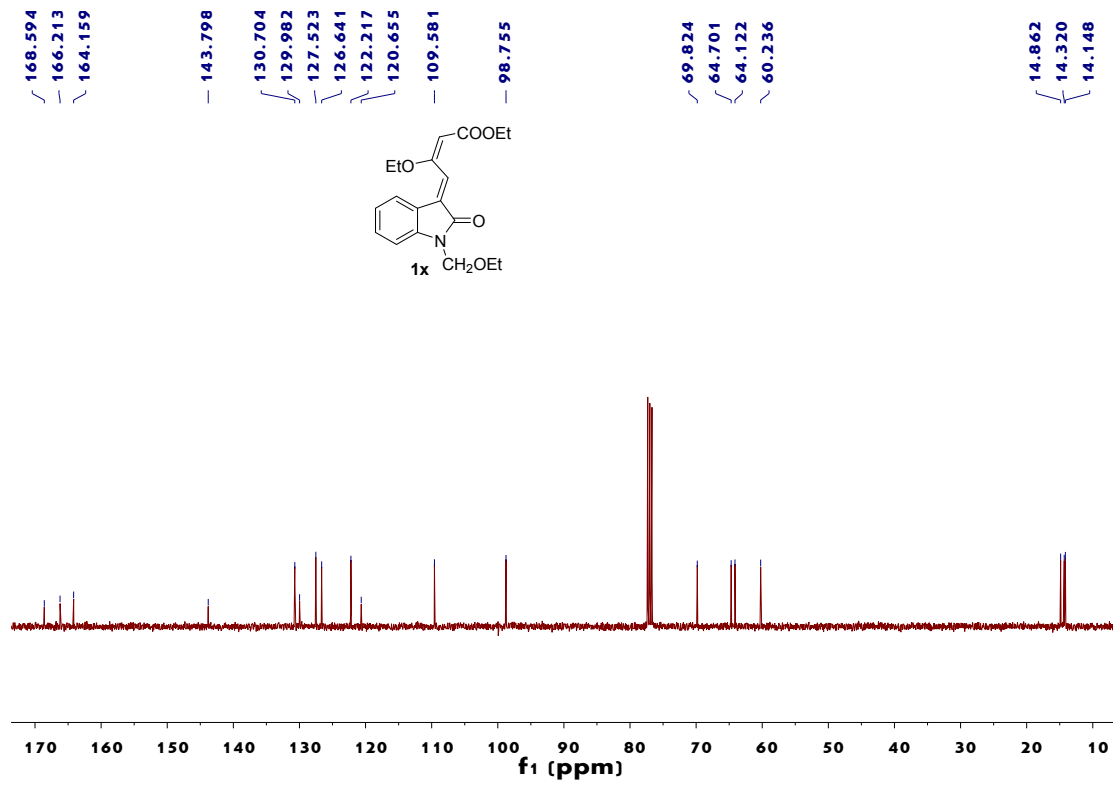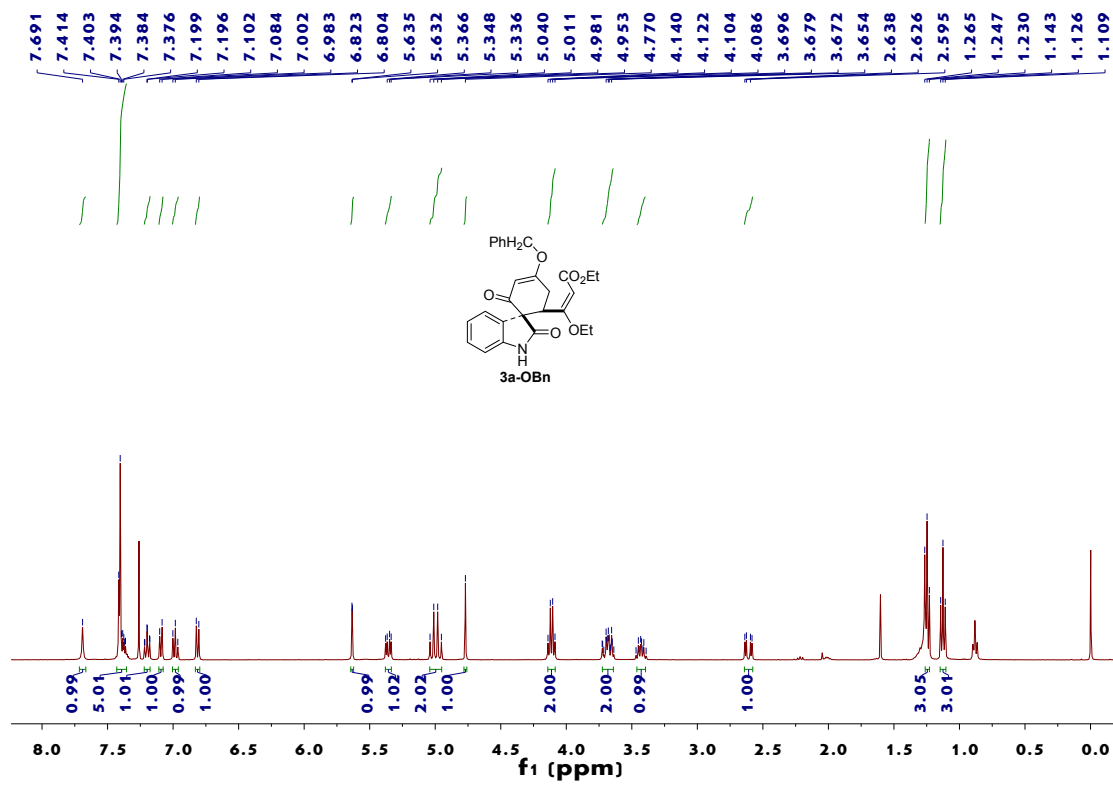

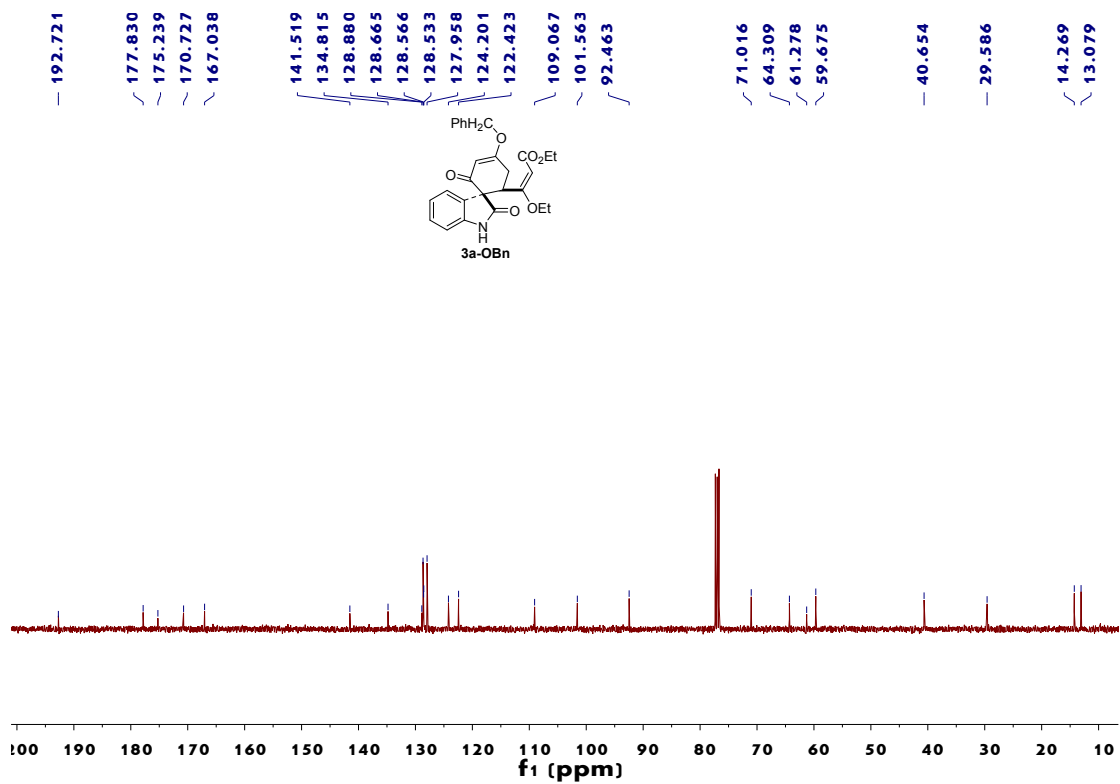

## 5 X-ray structure of **1h** and **3s**

### **1h**

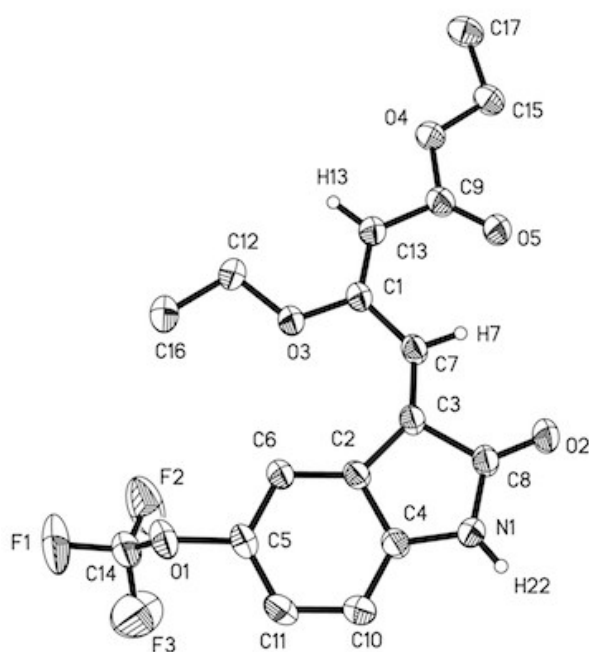



3s

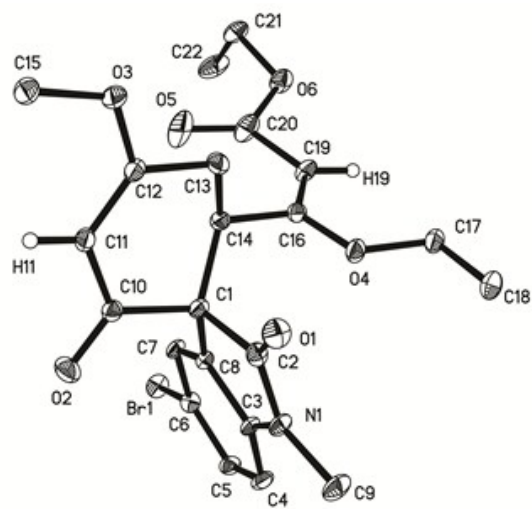

Supplement: c5ob02383a1.pdf [file c5ob02383a1.pdf]
